# Supplementary material for: Metal-free 3D donor–acceptor COF with low exciton binding for solar fuel production based on CO2reduction
Source: Royal Society of Chemistry journal article supplement (doi:10.1039/d3ta00901g), 2023-01-01
Supplement: d3ta00901g1.pdf [file d3ta00901g1.pdf]

## Supporting Information

### **Metal Free 3D Donor-Acceptor COF with Low Exciton Binding for Solar Fuel Production Based on CO<sub>2</sub> Reduction**

Anupam Dey<sup>a</sup>, Faruk Ahamed Rahimi<sup>a</sup>, Soumitra Barman<sup>a</sup>, Arpan Hazra<sup>a</sup>, Tapas Kumar Maji<sup>a\*</sup>

Molecular Materials Laboratory, School of Advanced Materials (SAMat), Chemistry and Physics of Materials Unit, Jawaharlal Nehru Centre for Advanced Scientific Research, Bangalore- 560064, India.

\*E-mail: [tmaji@jncasr.ac.in](mailto:tmaji@jncasr.ac.in)

## 2. Experimental section.

**2.1 Materials:** All the chemicals and solvents were purchased from commercial sources and used without purification. Tetrakis(triphenylphosphine)palladium (0) (99%) was purchased from Sigma–Aldrich. 1,1,2,2-Tetraphenylethylene (98%) and Tris(p-aminophenyl) amine were purchased from Alfa Aesar. Bromine (99.99%), 1,4-Dioxane, n-butanol (99.5%), o-dichlorobenzene (99%), acetic acid (99.8%), aniline and 4-formylphenylboronic acid (95.0%) were purchased Spectrochem.

### 2.2 Characterization techniques and instrumentation:

- **NMR (Liquid State):**  $^1\text{H}$  NMR and  $^{13}\text{C}$  NMR spectrum were recorded on Bruker AVANCE-400 spectrometer (at 400 MHz) with chemical shifts recorded as ppm, and all spectra were calibrated against TMS.
- **PXRD:** X-ray diffraction patterns for COF was recorded in Rigaku Smart Lab SE instrument using Cu-K $\alpha$  radiation ( $\lambda = 1.5406 \text{ \AA}$ ).
- **TGA:** Mettler Toledo-TGA 850 instrument was used to measure the thermal stability in  $\text{N}_2$  atmosphere within the temperature range 30 - 800 °C at a heating rate of 5 °C/min.
- **$\text{N}_2$  Sorption isotherm:**  $\text{N}_2$  adsorption measurements were carried out at 77 K in a QUANTACHROME QUADRASORD-SI analyzer. Samples were degassed at 150 °C and  $1 \times 10^{-1}$  Pa vacuum for 12 h before performing adsorption isotherm measurement.
- **FTIR:** FTIR spectra were recorded in Bruker FT-IR spectrometer. Samples were prepared as pellets using KBr for IR measurement.
- **$^{13}\text{C}$ -Solid State NMR:**  $^{13}\text{C}$ -Solid state cross-polarization magnetic angle spinning (CP/MAS) NMR spectrum measured on a Varian infinity plus 300WB spectrometer.
- **FESEM, EDS and TEM analysis:** Morphological studies have been carried out using Bruker Leica-S440I Field Emission Scanning Electron Microscope (FE-SEM) by placing

samples on a silicon wafer under high vacuum with an accelerating voltage of 100 kV. Energy dispersive spectroscopy (EDS) analysis was performed with an EDAX genesis instrument attached to the FESEM column. Transmission Electron Microscopy (TEM) analysis has been performed using JEOL JEM-3010 with an accelerating voltage at 300 kV.

- **Solid State UV-Vis Study:** Solid state UV-Vis studies were performed in solid state using Perkin Elmer Model Lambda 900 spectrophotometer instrument.

- **Temperature Dependent Photoluminescence (TDPL):** The temperature dependent photoluminescence (TDPL) studies were performed on an Edinburgh instrument (FLS 1000) by coated the sample on a quartz plate. In the range of 125-400K photoluminescence (PL) spectra have been recorded and from these integrated PL data  $E_b$  was calculated by using the Arrhenius equation,  $I_T = I_0 / (1 + A \exp(-E_b / k_B T))$ ; where  $I_0$  = initial integrated PL data at 125K,  $I_T$  = integrated PL data at different temperature,  $A$  = pre-exponential factor,  $E_b$  = exciton binding energy,  $k_B$  = Boltzmann constant ( $8.6173 \times 10^{-5}$  eVK<sup>-1</sup>) and  $T$  = temperature in kelvin scale.

We have plotted,  $\ln [(I_T/I_0)-1]$  against  $1/kT$  and fitted the data following linear equation  $Y=a+b*X$ . From slope we have calculated exciton binding energy,  $E_b = 84.2$  meV.

- **Time-Resolved Photoluminescence (TRPL):** The time-resolved photoluminescence (TRPL) study was also performed on an Edinburgh instrument (FLS 1000) in MeCN dispersed medium. Lifetime data for TT-COF in Ar, CO<sub>2</sub> purged atmosphere and TEA added CO<sub>2</sub> atmosphere were collected upon exciting at 510 nm. The average lifetime is calculated using following formula-

$$\tau_{avg} = \sum a_i \tau_i$$

Where,  $\tau_{avg}$  = average lifetime in nanoseconds,  $a_i$  = Normalized pre-exponential factor of the  $i$ -th components that exist in the excited state,  $\tau_i$  = sum of excited-state lifetime of  $i$ -th component. The details are provided in **Table S3**.

- **Electrochemical Characterization:** The electrochemical experiments i.e., Mott-Schottky analysis, impedance measurement and transient photocurrent measurement were carried out with a portable CHI760E workstation (CHI Instruments, USA) via a conventional three-electrode system in a N<sub>2</sub> purged 0.2 M Na<sub>2</sub>SO<sub>4</sub> aqueous solution. The Ag/AgCl electrode and platinum plate were used as the reference electrode and counter electrode respectively. For preparation of working electrode, 5 mg of TT-COF was dispersed in a solution of 100 μL water, 100 μL isopropyl alcohol (IPA) and 10 μL of nafion and kept it for sonication upto 30 min to prepare homogenous ink.

(i) **Mott-Schottky Analysis:** For electrode preparation, 12 μL of the slurry coated on glassy carbon electrode and then dried in room temperature and it was done at 4 different frequencies (at 2000 Hz, 3000Hz, 4000Hz and 5000Hz) in the potential window of -2.0 to +2.0 V.

(ii) **Electrochemical Impedance Measurement:** For electrode preparation, 12 μL of the slurry coated on glassy carbon electrode and then dried in room temperature and a white LED lamp (LEICA KL1600 LED) was used for illumination and measurement was recorded at -1.4 V (vs Ag/AgCl) applied bias from 0.1 Hz to 100 kHz (under the dark condition and LED lamp).

(iii) **Transient Photocurrent Measurement:** For electrode preparation, 300 μL of same slurry coated on ITO glass plate (1 cm x 1 cm) and then dried in room temperature. The transient photocurrent responses were carried out in presence of 290 W Xenon arc lamp upon consecutive light "ON-OFF" cycles for 30 s over 16 cycles.

## 2.2 Synthesis:

### A. Synthesis of Tetrakis(4-bromophenyl) ethylene [TPE-(Br)<sub>4</sub>]:

To an ice-water bath solution of 1, 1, 2, 2-Tetraphenylethylene (TPE, 5, 6.64 g, 20 mmol) in 40 mL glacial acetic acid, Bromine (8.3 mL, 160 mmol) was added dropwise via a pressure-equalizing dropping funnel in 15 minutes, under Argon atmosphere. After further adding 30 mL dichloromethane (DCM), the solution was heated to 50 ° C for 30 minutes. The reaction mixture was then carefully poured into 200 mL ice water, and the resulted precipitate was filtered and washed with 50 mL water and 50 mL ethanol, three times, respectively. After dried at 100 ° C under vacuum overnight, the obtained product tetra (4-bromophenyl) ethylene [TPE-(Br)<sub>4</sub>] was used directly for the next step without further purification.

#### **B. Synthesis of 1,1,2,2-Tetrakis[4-formyl-(1,1'-biphenyl)]ethane [TFTPE(CHO)<sub>4</sub>]:**

TFTPE (CHO)<sub>4</sub> was synthesized according to a published procedure.<sup>1</sup> An aqueous solution of K<sub>2</sub>CO<sub>3</sub> (1.66 g, 12 mmol) in water (15 mL) and tetrabutylammonium bromide (1.13 g) were added to a solution of tetrakis(4-bromophenyl)ethylene (684 mg, 1.00 mmol) and 4-formylphenylboronic acid (900 mg, 6.00 mmol) in toluene (80 mL). Pd (PPh<sub>3</sub>)<sub>4</sub> (10 mg, 10 mole %) was added, and then the mixture was stirred at 85 °C for 24 h. After cooling to room temperature, water was added, and the organic layer was separated in CHCl<sub>3</sub>. Further, purification was carried out by column chromatography in CHCl<sub>3</sub>/Acetone (95/5) solvent mixture. Then recrystallization in CHCl<sub>3</sub>/diethyl ether gave a yellowish-green solid (535 mg, 71%); <sup>1</sup>H-NMR (DMSO-d<sub>6</sub>, 25 °C, 400 MHz): δ (ppm) = 10.03 (s, 4H), 7.94 (d, J = 8.3 Hz, 8H), 7.91 (d, J = 8.3 Hz, 8H), 7.69 (d, J = 8.3 Hz, 8H), 7.24 (d, J = 8.3 Hz, 8H). <sup>13</sup>C-NMR (DMSO-d<sub>6</sub>, 25 °C, 400 MHz): δ (ppm)= 192.68, 144.91, 143.33, 140.35, 136.89, 135.07, 131.66, 130.12, 127.08, 126.70. MALDI: m/z=748.066 (molecular mass).

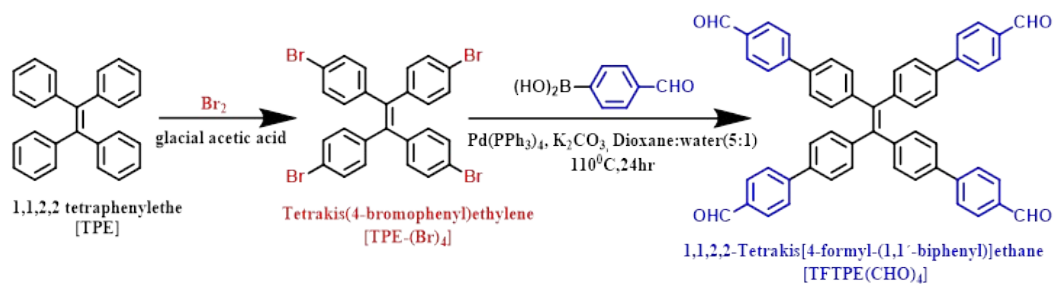

**Scheme-S1.** Synthesis of TFTPE (CHO)<sub>4</sub>

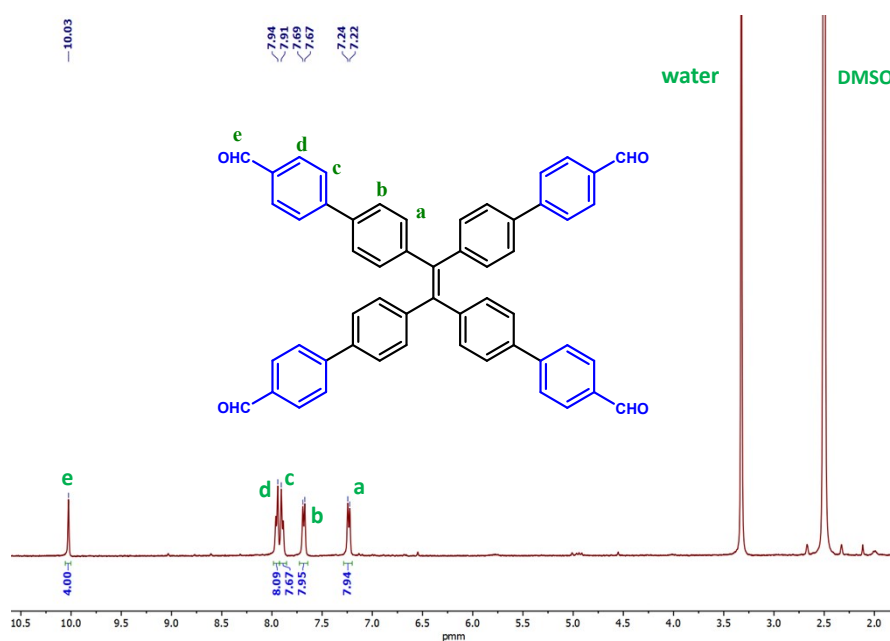

**Fig. S1.** <sup>1</sup>H-NMR of TFTPE (CHO)<sub>4</sub>

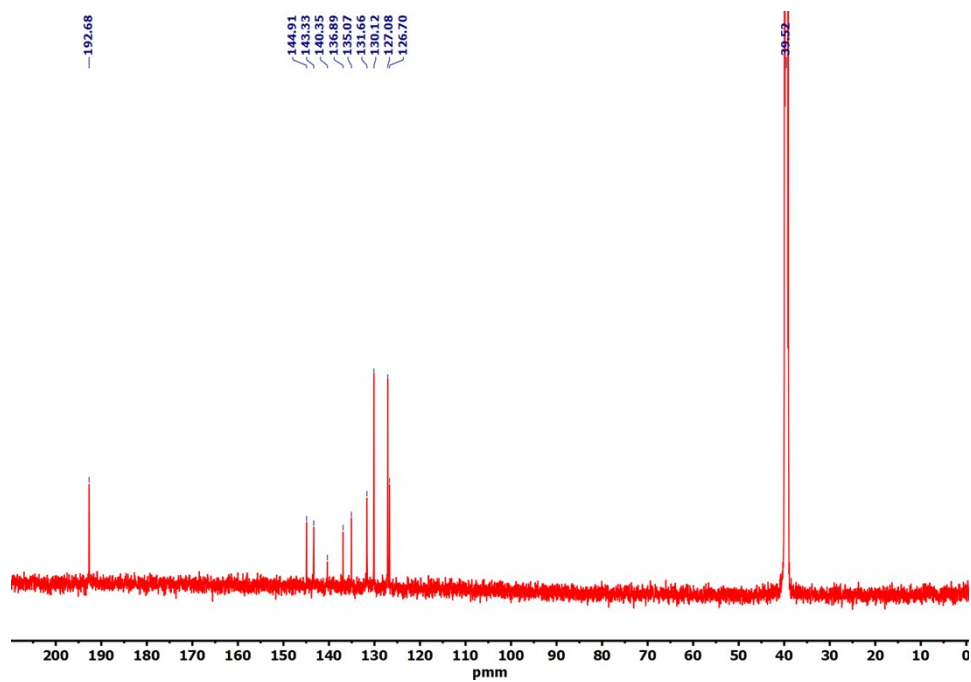

**Fig. S2.**  $^{13}\text{C}$ -NMR of TFTPE (CHO) $_4$

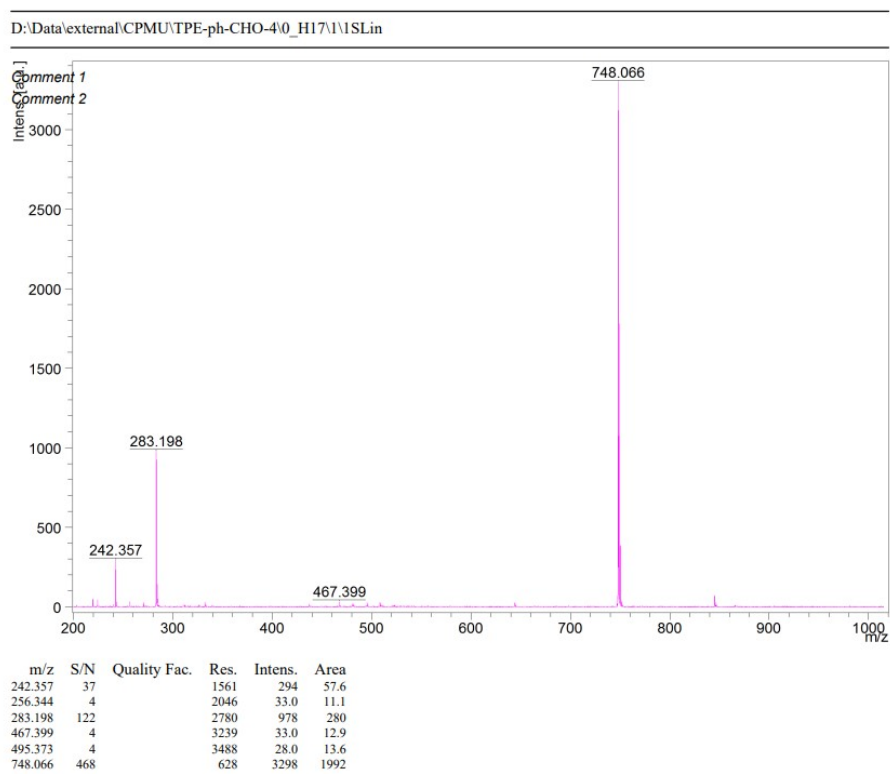

**Fig. S3.** MALDI of TFTPE (CHO) $_4$

**Synthesis of TT-COF:**

A Pyrex tube measuring 10 × 8 mm (o.d × i.d) was loaded with TFTPE(CHO)<sub>4</sub> (11.2 mg, 0.015 mmol), tris(4-aminophenyl) amine (TAPA) (5.8 mg, 0.02 mmol), n-BuOH (0.5 mL) and o-dichlorobenzene (O-DCB) (0.5mL) and sonicated for 15 mins. After 0.1 mL aqueous acetic acid (6 M) and aniline (27 uL, 0.21 mmol) addition the mixture was again sonicated for 10 mins to afford a homogeneous dispersion. The tube was undergone three cycles of freeze-pump-thaw under liquid N<sub>2</sub> and 10<sup>-4</sup> mbar internal pressure. Then it was sealed by a flame to a length of 10 cm, approximately. The reaction was heated to 120 °C for 5 days yielding an orange solid, COF-19. The solid was isolated by filtration and washed with dry THF and dried at 60 °C for 3 h to yield 14.1 mg TT-COF (82% yield based on TFTPE(CHO)<sub>4</sub>).

**Table S1.** Fractional atomic coordinates for the unit cell of TT-COF.

| <b>TT-COF</b>                                          |          |          |          |              |          |          |          |
|--------------------------------------------------------|----------|----------|----------|--------------|----------|----------|----------|
| <b>Space group: C2/M</b>                               |          |          |          |              |          |          |          |
| <b>a = 47.318491 Å, b = 90.970425 Å, c = 28.01194Å</b> |          |          |          |              |          |          |          |
| <b>α = 90°, β = 88.30852°, γ = 90°</b>                 |          |          |          |              |          |          |          |
| <b>Atoms</b>                                           | <b>X</b> | <b>Y</b> | <b>Z</b> | <b>Atoms</b> | <b>X</b> | <b>Y</b> | <b>Z</b> |
| <b>C1</b>                                              | 0.61607  | 0.73547  | -0.07746 | <b>C103</b>  | 1.08278  | 0.79148  | 0.61116  |
| <b>C2</b>                                              | 0.09241  | 0.24089  | -0.05192 | <b>C104</b>  | 1.10009  | 0.79947  | 0.64131  |
| <b>C3</b>                                              | 0.08181  | 0.23336  | -0.01179 | <b>C105</b>  | 1.10839  | 0.79346  | 0.68419  |
| <b>C4</b>                                              | 0.59478  | 0.7203   | 0.00296  | <b>C106</b>  | 1.07351  | 0.79786  | 0.56651  |
| <b>C5</b>                                              | 0.61778  | 0.71459  | -0.02409 | <b>C107</b>  | 1.06003  | 0.7947   | 1.05146  |
| <b>C6</b>                                              | 0.62835  | 0.72217  | -0.06413 | <b>C108</b>  | 1.05125  | 0.80105  | 1.09471  |
| <b>C7</b>                                              | 0.58549  | 0.71325  | 0.04818  | <b>C109</b>  | 1.06787  | 0.79954  | 1.1345   |
| <b>N8</b>                                              | 0.57372  | 0.68406  | 0.19893  | <b>C110</b>  | 1.09307  | 0.79157  | 1.13192  |



|            |         |         |          |             |         |         |          |
|------------|---------|---------|----------|-------------|---------|---------|----------|
| <b>C9</b>  | 0.56784 | 0.67859 | 0.2458   | <b>C111</b> | 1.10188 | 0.78516 | 1.08886  |
| <b>C10</b> | 0.05365 | 0.18735 | 0.28024  | <b>C112</b> | 1.05847 | 0.80594 | 1.1793   |
| <b>C11</b> | 0.04871 | 0.18212 | 0.32611  | <b>C113</b> | 0.20345 | 0.72075 | 0.68894  |
| <b>C12</b> | 0.55765 | 0.66802 | 0.338    | <b>C114</b> | 0.2118  | 0.7143  | 0.64626  |
| <b>C13</b> | 0.57245 | 0.65935 | 0.30422  | <b>C115</b> | 0.20265 | 0.70024 | 0.63556  |
| <b>C14</b> | 0.57788 | 0.66471 | 0.25831  | <b>C116</b> | 0.18484 | 0.69254 | 0.66717  |
| <b>C15</b> | 0.35662 | 0.4862  | 0.39782  | <b>C117</b> | 0.17674 | 0.69882 | 0.7105   |
| <b>C16</b> | 0.85236 | 0.97915 | 0.4419   | <b>C118</b> | 0.21194 | 0.69395 | 0.5907   |
| <b>C17</b> | 0.83853 | 0.96553 | 0.44426  | <b>C119</b> | 0.16343 | 0.70657 | 0.08823  |
| <b>C18</b> | 0.82889 | 0.95886 | 0.40221  | <b>C120</b> | 0.17182 | 0.70055 | 0.13106  |
| <b>C19</b> | 0.3324  | 0.46645 | 0.35862  | <b>C121</b> | 0.18962 | 0.70843 | 0.1607   |
| <b>C20</b> | 0.34624 | 0.47991 | 0.35646  | <b>C122</b> | 0.19892 | 0.72238 | 0.14726  |
| <b>C21</b> | 0.81607 | 0.94394 | 0.40256  | <b>C123</b> | 0.19033 | 0.72855 | 0.10479  |
| <b>N22</b> | 0.2804  | 0.39123 | 0.41477  | <b>C124</b> | 0.19907 | 0.70207 | 0.20529  |
| <b>C23</b> | 0.26708 | 0.37775 | 0.40308  | <b>H125</b> | 0.08262 | 0.25106 | -0.06272 |
| <b>C24</b> | 0.27607 | 0.36556 | 0.42762  | <b>H126</b> | 0.06402 | 0.23788 | 0.00845  |
| <b>C25</b> | 0.26374 | 0.35207 | 0.41982  | <b>H127</b> | 0.62773 | 0.7044  | -0.01401 |
| <b>C26</b> | 0.24193 | 0.3507  | 0.38731  | <b>H128</b> | 0.64648 | 0.71791 | -0.08409 |
| <b>C27</b> | 0.73402 | 0.86272 | 0.35979  | <b>H129</b> | 0.04662 | 0.19833 | 0.27208  |
| <b>C28</b> | 0.74644 | 0.87627 | 0.3675   | <b>H130</b> | 0.03746 | 0.18892 | 0.35207  |
| <b>C29</b> | 0.1437  | 0.25616 | -0.11021 | <b>H131</b> | 0.57955 | 0.64844 | 0.31377  |
| <b>C30</b> | 0.14961 | 0.26134 | -0.06207 | <b>H132</b> | 0.58951 | 0.65799 | 0.23249  |
| <b>C31</b> | 0.67165 | 0.75511 | -0.03715 | <b>H133</b> | 0.86017 | 0.9841  | 0.47404  |
| <b>C32</b> | 0.67874 | 0.76076 | 0.00698  | <b>H134</b> | 0.83607 | 0.96015 | 0.47863  |
| <b>C33</b> | 0.16377 | 0.27276 | 0.02752  | <b>H135</b> | 0.32448 | 0.46197 | 0.32594  |

|            |         |         |          |             |          |         |          |
|------------|---------|---------|----------|-------------|----------|---------|----------|
| <b>C34</b> | 0.14087 | 0.27859 | 0.00223  | <b>H136</b> | 0.34915  | 0.48534 | 0.32235  |
| <b>C35</b> | 0.13396 | 0.27289 | -0.04203 | <b>H137</b> | 0.29253  | 0.36673 | 0.4533   |
| <b>C36</b> | 0.17243 | 0.27924 | 0.07408  | <b>H138</b> | 0.27055  | 0.34281 | 0.44055  |
| <b>N37</b> | 0.18776 | 0.30999 | 0.2211   | <b>H139</b> | 0.71759  | 0.86176 | 0.33384  |
| <b>C38</b> | 0.19731 | 0.31715 | 0.26248  | <b>H140</b> | 0.73918  | 0.8852  | 0.34565  |
| <b>C39</b> | 0.72434 | 0.82339 | 0.26256  | <b>H141</b> | 0.68378  | 0.74606 | -0.05222 |
| <b>C40</b> | 0.73353 | 0.8304  | 0.30343  | <b>H142</b> | 0.6966   | 0.75582 | 0.02362  |
| <b>C41</b> | 0.21575 | 0.33107 | 0.34443  | <b>H143</b> | 0.12802  | 0.28755 | 0.01575  |
| <b>C42</b> | 0.18843 | 0.32507 | 0.34349  | <b>H144</b> | 0.11642  | 0.27751 | -0.06077 |
| <b>C43</b> | 0.17919 | 0.31826 | 0.30249  | <b>H145</b> | 0.7381   | 0.82284 | 0.23097  |
| <b>N44</b> | 0.54983 | 0.66203 | 0.3836   | <b>H146</b> | 0.75458  | 0.83509 | 0.30352  |
| <b>C45</b> | 0.15594 | 0.73538 | 0.84985  | <b>H147</b> | 0.17438  | 0.32571 | 0.37466  |
| <b>C46</b> | 0.67907 | 0.24091 | 0.82365  | <b>H148</b> | 0.15819  | 0.31359 | 0.30225  |
| <b>C47</b> | 0.68948 | 0.23342 | 0.78375  | <b>H149</b> | 0.68887  | 0.25115 | 0.83359  |
| <b>C48</b> | 0.17666 | 0.72025 | 0.76855  | <b>H150</b> | 0.70748  | 0.23825 | 0.7654   |
| <b>C49</b> | 0.15426 | 0.7144  | 0.79737  | <b>H151</b> | 0.14364  | 0.70428 | 0.78922  |
| <b>C50</b> | 0.14408 | 0.72194 | 0.83747  | <b>H152</b> | 0.12633  | 0.7175  | 0.85792  |
| <b>C51</b> | 0.18591 | 0.71312 | 0.72252  | <b>H153</b> | 0.72401  | 0.19881 | 0.49848  |
| <b>N52</b> | 0.19755 | 0.68364 | 0.57115  | <b>H154</b> | 0.73524  | 0.18956 | 0.41942  |
| <b>C53</b> | 0.20391 | 0.67857 | 0.52414  | <b>H155</b> | 0.19549  | 0.64828 | 0.45613  |
| <b>C54</b> | 0.71793 | 0.18767 | 0.49032  | <b>H156</b> | 0.18364  | 0.65767 | 0.5369   |
| <b>C55</b> | 0.72412 | 0.18252 | 0.44484  | <b>H157</b> | -0.08694 | 0.98412 | 0.30198  |
| <b>C56</b> | 0.21653 | 0.66823 | 0.43275  | <b>H158</b> | -0.06255 | 0.9601  | 0.29724  |
| <b>C57</b> | 0.20172 | 0.6593  | 0.46583  | <b>H159</b> | 0.44855  | 0.46135 | 0.4496   |
| <b>C58</b> | 0.19512 | 0.66455 | 0.51138  | <b>H160</b> | 0.42414  | 0.48521 | 0.45365  |

|            |          |         |         |             |         |         |         |
|------------|----------|---------|---------|-------------|---------|---------|---------|
| <b>C59</b> | 0.41669  | 0.48614 | 0.37824 | <b>H161</b> | 0.48088 | 0.36676 | 0.32126 |
| <b>C60</b> | -0.07912 | 0.97912 | 0.33406 | <b>H162</b> | 0.50388 | 0.34303 | 0.33218 |
| <b>C61</b> | -0.0653  | 0.96548 | 0.33155 | <b>H163</b> | 0.0577  | 0.86211 | 0.43743 |
| <b>C62</b> | -0.05569 | 0.95881 | 0.37345 | <b>H164</b> | 0.035   | 0.88535 | 0.42761 |
| <b>C63</b> | 0.44081  | 0.46618 | 0.41724 | <b>H165</b> | 0.08909 | 0.74565 | 0.82342 |
| <b>C64</b> | 0.42708  | 0.47975 | 0.41958 | <b>H166</b> | 0.07613 | 0.75548 | 0.7477  |
| <b>C65</b> | -0.04287 | 0.94402 | 0.3724  | <b>H167</b> | 0.64362 | 0.28778 | 0.75694 |
| <b>N66</b> | 0.49245  | 0.3912  | 0.3606  | <b>H168</b> | 0.65527 | 0.27772 | 0.83338 |
| <b>C67</b> | 0.50662  | 0.37785 | 0.37091 | <b>H169</b> | 0.03758 | 0.82458 | 0.54153 |
| <b>C68</b> | 0.49779  | 0.36567 | 0.34615 | <b>H170</b> | 0.02191 | 0.83712 | 0.46919 |
| <b>C69</b> | 0.51072  | 0.35229 | 0.35287 | <b>H171</b> | 0.59884 | 0.32366 | 0.39456 |
| <b>C70</b> | 0.53309  | 0.35102 | 0.38434 | <b>H172</b> | 0.61425 | 0.31122 | 0.46692 |
| <b>C71</b> | 0.04091  | 0.863   | 0.41211 | <b>H173</b> | 0.91903 | 1.06716 | 0.39798 |
| <b>C72</b> | 0.0278   | 0.87645 | 0.4056  | <b>H174</b> | 0.94108 | 1.09172 | 0.39901 |
| <b>C73</b> | 0.62845  | 0.25608 | 0.88243 | <b>H175</b> | 1.02029 | 1.07315 | 0.35129 |
| <b>C74</b> | 0.62264  | 0.26124 | 0.83409 | <b>H176</b> | 0.99912 | 1.04854 | 0.3497  |
| <b>C75</b> | 0.10096  | 0.75484 | 0.80869 | <b>H177</b> | 1.01175 | 1.09631 | 0.41143 |
| <b>C76</b> | 0.09379  | 0.76052 | 0.76461 | <b>H178</b> | 1.16698 | 1.0621  | 0.66834 |
| <b>C77</b> | 0.60844  | 0.27269 | 0.74447 | <b>H179</b> | 1.18886 | 1.08613 | 0.66936 |
| <b>C78</b> | 0.63104  | 0.27867 | 0.77014 | <b>H180</b> | 1.22615 | 1.07894 | 0.52977 |
| <b>C79</b> | 0.63798  | 0.27296 | 0.81438 | <b>H181</b> | 1.20497 | 1.0543  | 0.52741 |
| <b>C80</b> | 0.59982  | 0.27916 | 0.69789 | <b>H182</b> | 1.23929 | 1.09619 | 0.63524 |
| <b>N81</b> | 0.58577  | 0.30959 | 0.54993 | <b>H183</b> | 1.07525 | 0.76022 | 0.67385 |
| <b>C82</b> | 0.57665  | 0.31683 | 0.50842 | <b>H184</b> | 1.06052 | 0.77114 | 0.60106 |
| <b>C83</b> | 0.0508   | 0.8243  | 0.50927 | <b>H185</b> | 1.10691 | 0.81048 | 0.63195 |

|             |         |         |         |             |         |         |         |
|-------------|---------|---------|---------|-------------|---------|---------|---------|
| <b>C84</b>  | 0.04208 | 0.83149 | 0.46844 | <b>H186</b> | 1.12116 | 0.80035 | 0.70616 |
| <b>C85</b>  | 0.55914 | 0.33116 | 0.4265  | <b>H187</b> | 1.05657 | 0.79262 | 0.54755 |
| <b>C86</b>  | 0.58532 | 0.32388 | 0.42645 | <b>H188</b> | 1.04703 | 0.79611 | 1.02083 |
| <b>C87</b>  | 0.59411 | 0.31686 | 0.46742 | <b>H189</b> | 1.03183 | 0.80733 | 1.09757 |
| <b>N88</b>  | 0.22541 | 0.66241 | 0.38748 | <b>H190</b> | 1.1055  | 0.79023 | 1.1635  |
| <b>C89</b>  | 0.94095 | 1.06831 | 0.38665 | <b>H191</b> | 1.12127 | 0.77886 | 1.08742 |
| <b>C90</b>  | 0.95325 | 1.08224 | 0.38688 | <b>H192</b> | 1.03909 | 0.8018  | 1.1959  |
| <b>C91</b>  | 0.98179 | 1.08371 | 0.37364 | <b>H193</b> | 0.21091 | 0.73178 | 0.69393 |
| <b>C92</b>  | 0.99803 | 1.07163 | 0.36013 | <b>H194</b> | 0.22518 | 0.72035 | 0.62105 |
| <b>C93</b>  | 0.98585 | 1.05776 | 0.35944 | <b>H195</b> | 0.17764 | 0.68158 | 0.6586  |
| <b>C94</b>  | 0.9967  | 1.09693 | 0.38384 | <b>H196</b> | 0.16353 | 0.69216 | 0.73376 |
| <b>C95</b>  | 1.17959 | 1.06536 | 0.63736 | <b>H197</b> | 0.23035 | 0.69878 | 0.57312 |
| <b>C96</b>  | 1.19168 | 1.07917 | 0.63816 | <b>H198</b> | 0.15025 | 0.69977 | 0.06665 |
| <b>C97</b>  | 1.20819 | 1.08391 | 0.59939 | <b>H199</b> | 0.16463 | 0.68963 | 0.14079 |
| <b>C98</b>  | 1.21255 | 1.07514 | 0.55911 | <b>H200</b> | 0.2127  | 0.72856 | 0.1699  |
| <b>C99</b>  | 1.20055 | 1.06115 | 0.55816 | <b>H201</b> | 0.19788 | 0.73949 | 0.0973  |
| <b>C100</b> | 1.22509 | 1.09667 | 0.60634 | <b>H202</b> | 0.2154  | 0.70762 | 0.22487 |
| <b>C101</b> | 1.08242 | 0.77125 | 0.66668 | <b>C203</b> | 0.3727  | 0.5     | 0.39413 |
| <b>C102</b> | 1.07388 | 0.77742 | 0.62415 | <b>C204</b> | 0.40062 | 0.5     | 0.38201 |

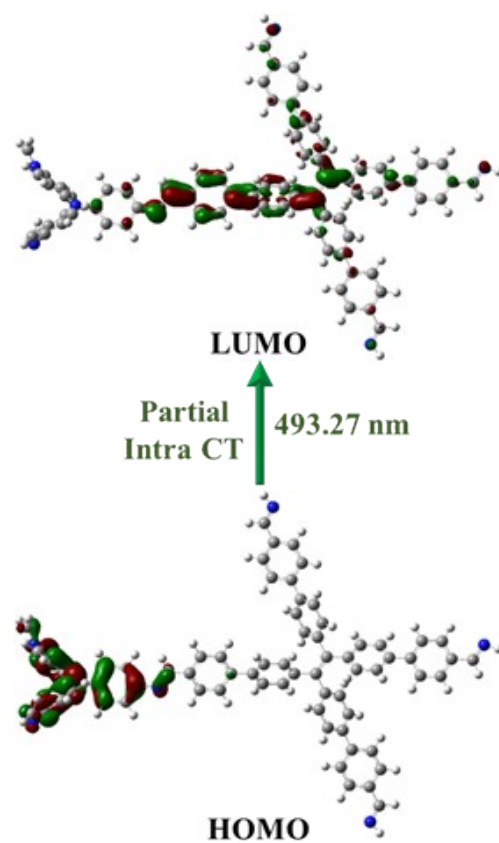

**Fig. S4.** TDDFT calculation and for TT-COF.

**Table S2.** Assignment of experimental solid-state absorption spectrum of TT-COF.

| Absorption maximum | Transition               | % Matching               | Oscillation strength ( $f$ ) | Assignment       |
|--------------------|--------------------------|--------------------------|------------------------------|------------------|
| 490 nm             | HOMO→LUMO<br>(493.27 nm) | 85%<br>( $c = 0.63947$ ) | 0.7775                       | Partial Intra CT |

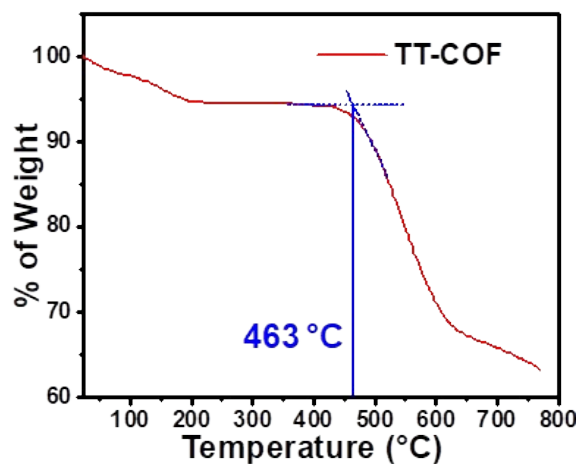

**Fig. S5.** Thermogravimetric analysis (TGA) of TT-COF under  $N_2$  atmosphere good thermal stability upto  $460^\circ C$  after some initial weight loss due to trapped solvent molecules inside the framework (boiling point of n-BuOH and O-DCB are  $117.7^\circ C$  and  $180.19^\circ C$  respectively).

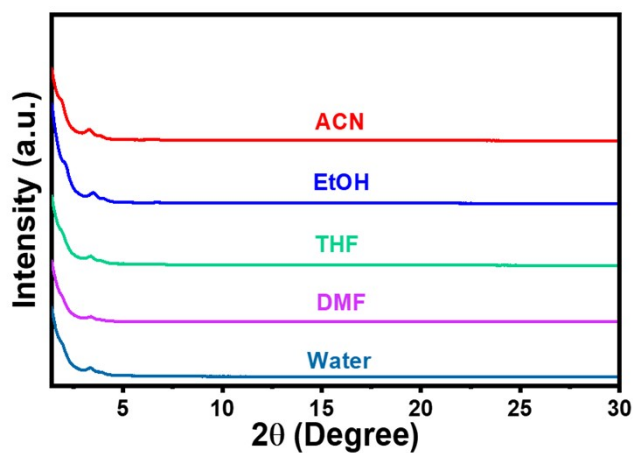

**Fig. S6.** PXRD patterns of TT-COF after soaking in different solvent for 36 h. After soaked in different solvents at room temperature for 36 h the samples were filtrated, washed with THF and dried in  $50^\circ C$  for 5 h.

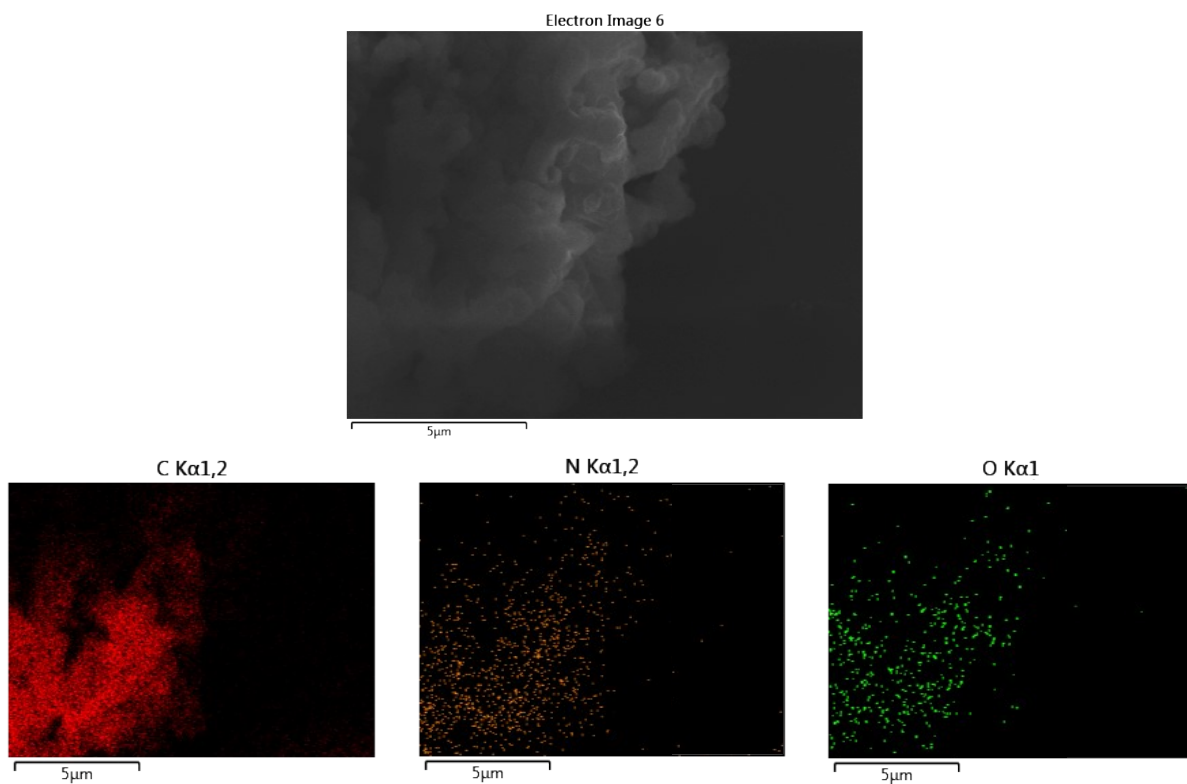

**Fig. S7.** Elemental mapping for TT-COF displays distribution of C,N and O throughout the framework.

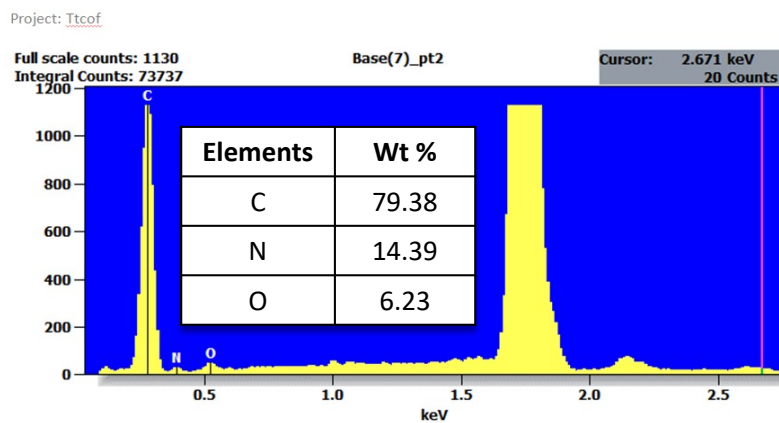

**Figure S8.** EDAX analysis for TT-COF.

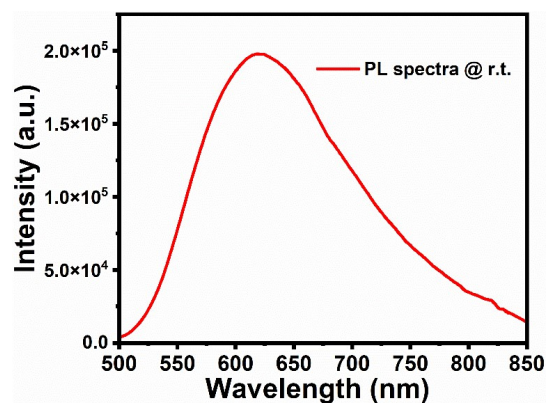

Fig. S9. PL spectrum of TT-COF at room temperature .

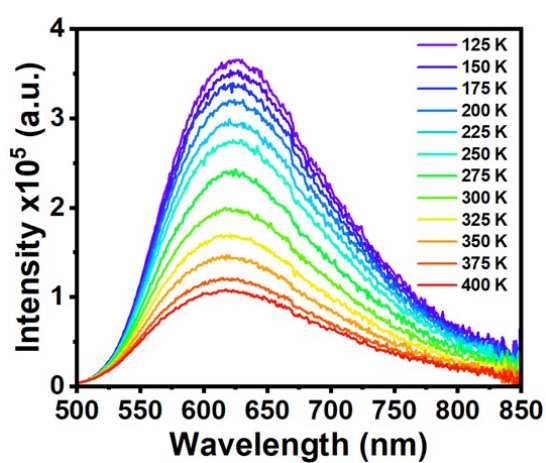

Fig. S10. PL spectra of TT-COF at different temperature.

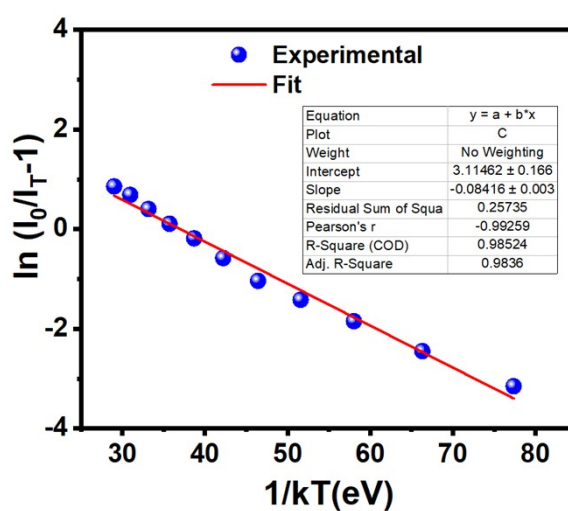

Fig. S11. Plot of  $\ln [(I_T/I_0)-1]$  vs  $1/kT$  and the data were fitted by linear equation. From slope exciton binding energy,  $E_b$  was obtained 84.2 meV which is low.



### 3. Photocatalytic CO<sub>2</sub> Reduction:

At first, a stock solution was prepared by dispersing 1 mg of finely powdered TT-COF sample in 40 ml MeCN and sonicated for 10 minutes. From this homogeneously dispersed stock solution 5 mL was taken in a 30mL quartz tube vial. Next highly pure CO<sub>2</sub> gas (99.99%) was purged into the reaction mixture for 30 minutes. Then 0.5 mL TEA was added and sealed the setup which makes 24.5 mL of void space. After that, quartz tube vial was kept in front of 290 W Xenon Arc lamp with a visible band pass filter ( $\lambda > 420$  nm) with continuous stirring for the photocatalytic reaction. During irradiation, 1 ml of gas production was continuously taken from the reaction cell at a given time interval and subsequent gas formation was analysed using gas chromatography mass spectrometry (GC-MS) (SHIMADZU GC-2010 PLUS). Produced gases were quantified by using RT® Molecular sieve 5A column (45 m, 0.32 mm ID, 30  $\mu$ m df) with a mass detector. The calibration was done by a standard gas mixture of H<sub>2</sub>, CO, CH<sub>4</sub> of different concentration in ppm-level. Importantly, GC-MS has a detection limit of 1.0 ppm for H<sub>2</sub>, CO and CH<sub>4</sub>. After the photocatalysis, the reaction mixture was filtered to remove the residual solid, and the solution was further analysed to determine the amount of liquid product. The liquid product was verified with <sup>1</sup>H-NMR using the water suppression method. All controlled photocatalytic experiments were carried out in similar way. Selectivity was calculated by using the following equation:

$$\text{Selectivity of CO} = \frac{2 \times n_{CO}}{(2 \times n_{H_2} + 2 \times n_{CO} + 8 \times n_{CH_4})} \times 100\%$$

- **Isotopic labelling (<sup>13</sup>CO<sub>2</sub>) experiment:** For isotopic labelling experiment, 1 L <sup>13</sup>CO<sub>2</sub> gas cylinder was purchased from Sigma Aldrich (details: 99.0% ATOM % <sup>13</sup>C, <3 Atom % <sup>18</sup>O; M.W. 45.00 g/mol). We have purged the <sup>13</sup>CO<sub>2</sub> for 5 min in a controlled manner to the photocatalytic reaction mixture of TT-COF.

- **Turnover Number (TON) calculation:** The turnover number (TON) is calculated by using the following formula-

$$TON = \frac{\text{Amount of product evolved } (\mu\text{mol})}{\text{amount of catalyst } (\mu\text{mol})}$$

- **Apparent quantum efficiency (AQY):** The apparent quantum efficiency (AQE) is defined by the ratio of the effective electron used for product formation to the total input photon flux. The AQE is calculated by using the below formula.

$$AQE(\%) = \frac{\text{Effective electrons in product}}{\text{Total photons}} \times 100\% = \frac{n \times Y \times N}{\theta \times t \times A} \times 100\%$$

Where, n is the number of electrons used in the photocatalysis process, Y is the yield of evolved gas from the sample (mol), N is the Avogadro's number ( $6.022 \times 10^{23} \text{ mol}^{-1}$ ),  $\theta$  is the photon flux, t is the irradiation time, and A is the illumination area. The photon flux was calculated at  $400 \pm 10 \text{ nm}$ ,  $450 \pm 10 \text{ nm}$ ,  $500 \pm 10 \text{ nm}$ ,  $550 \pm 10 \text{ nm}$ ,  $600 \pm 10 \text{ nm}$  by using separate bandpass filters with the help of power meter. The power meter (model: LaserCheck: 0623G19R) used for the experiment was purchased from Coherent.

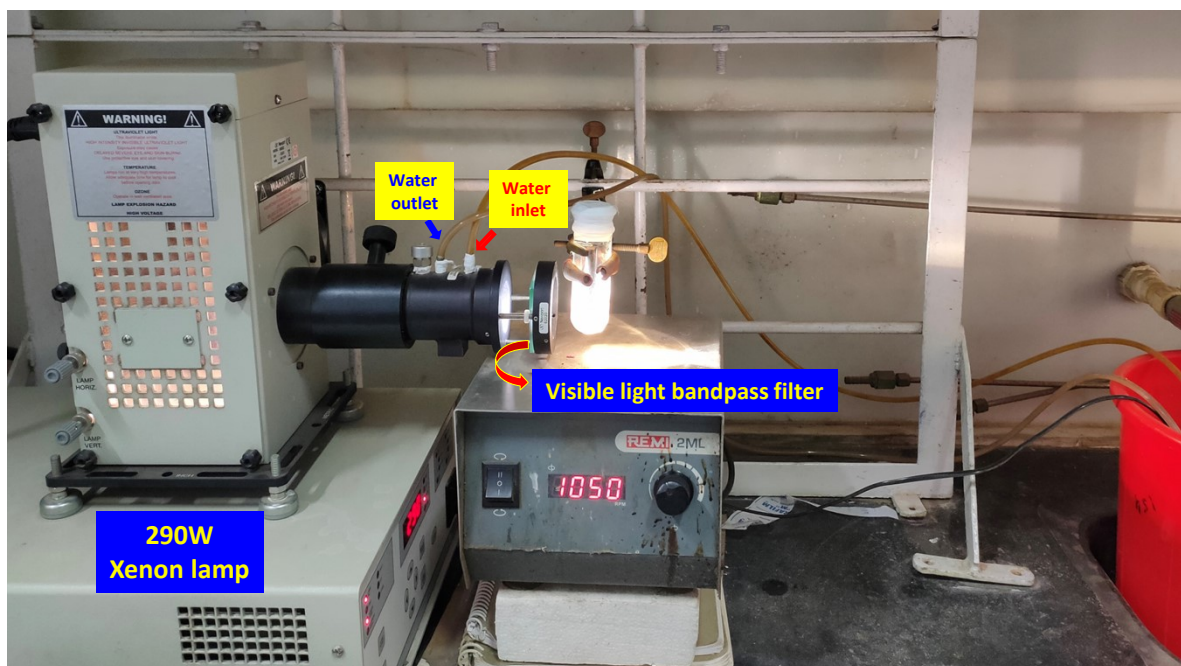

Fig. S12. Photographic image of the photocatalytic CO<sub>2</sub> reduction set up.

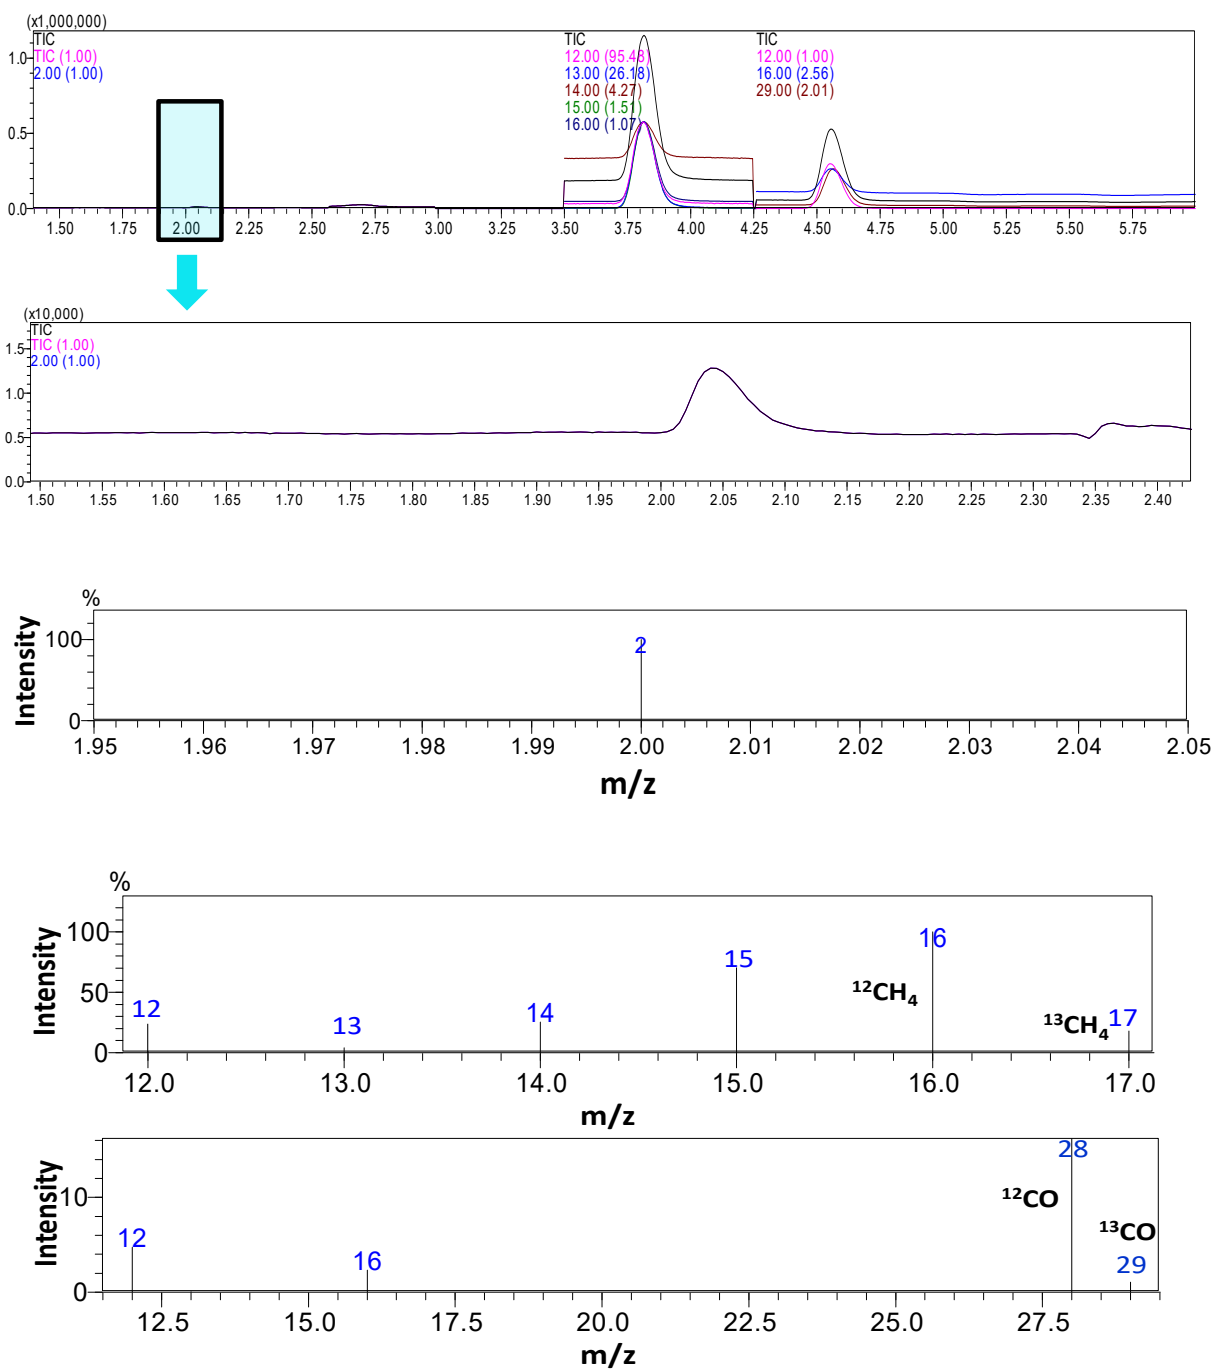

**Fig. S13.** GC chromatograms and mass spectra of obtained products (CO, CH<sub>4</sub>, H<sub>2</sub>) from the photocatalytic CO<sub>2</sub> reduction reaction under Xe lamp in <sup>12</sup>CO<sub>2</sub> atmosphere (a) GC chromatogram, retention time from 1.4 to 6 min (b) Chromatogram part for H<sub>2</sub> detection, retention time from 1.4 to 2.4 min (c) Mass spectra for H<sub>2</sub>; m/z = 2 is assigned to H<sub>2</sub> (d) Mass spectra for <sup>12</sup>CH<sub>4</sub>; m/z = 16 is assigned to <sup>12</sup>CH<sub>4</sub>. (e) Mass spectra for <sup>12</sup>CO; m/z = 28 is assigned to <sup>12</sup>CO.

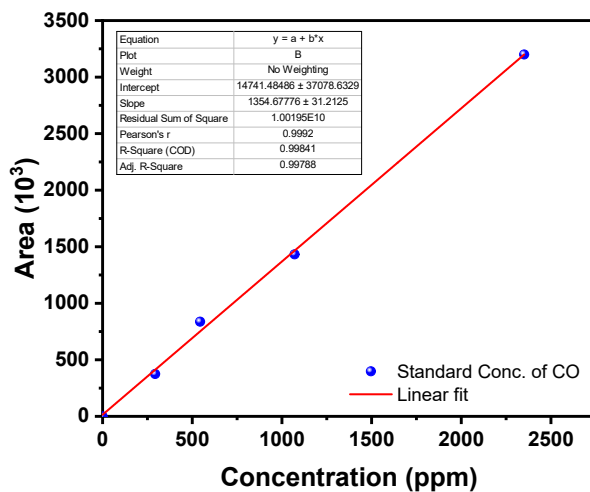

**Fig. S14.** Calibration plot for CO (calibration was performed by taking different ppm concentrations of CO gas).

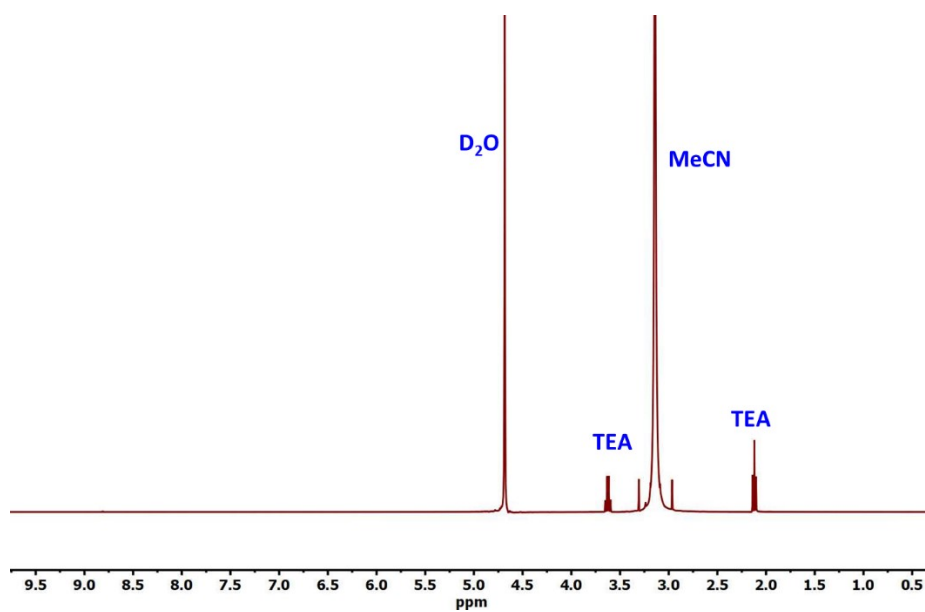

**Fig. S15.** No liquid product detection in  $^1H$  NMR spectrum after 26 h of photoirradiation in presence of  $CO_2$  by TT-COF. After filtration of catalytic reaction mixture, 500  $\mu L$  of aliquot was taken in the NMR tube with  $D_2O$  (50  $\mu L$ ) and 50  $\mu L$  4 mM DMSO as an internal standard. Water presaturation method was employed during measurement.

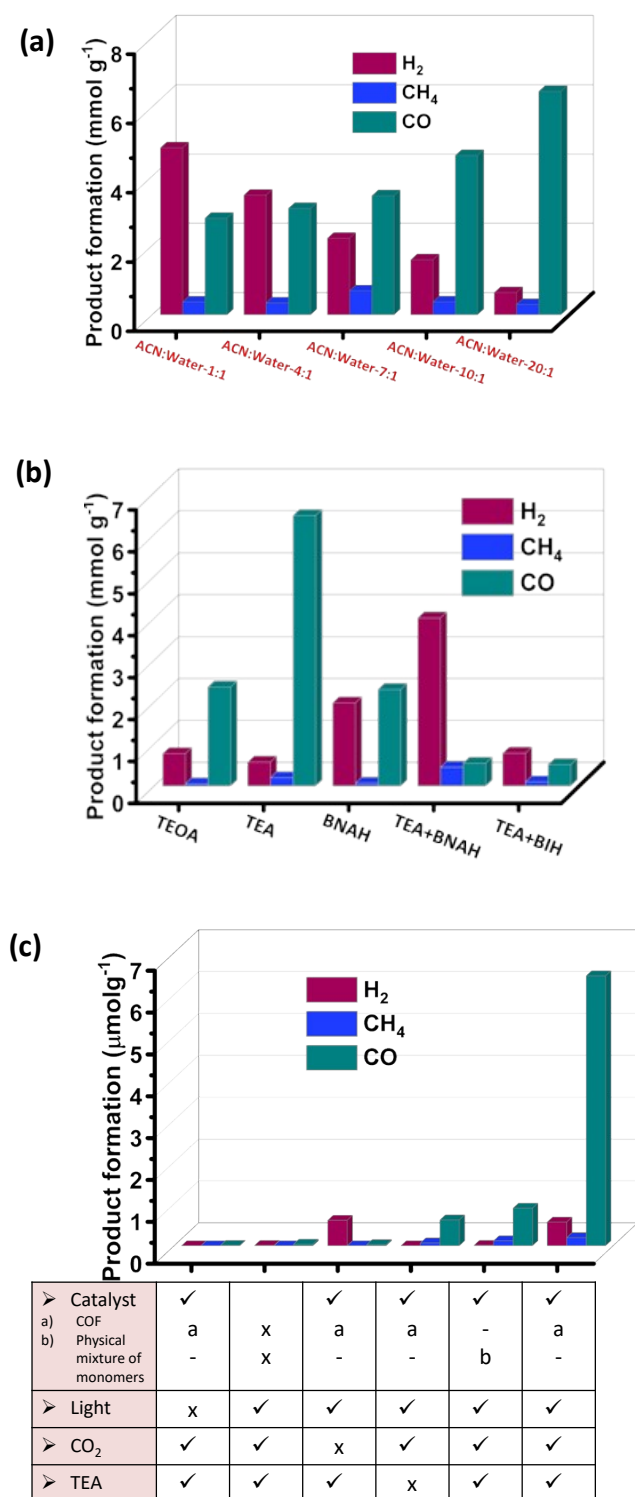

**Fig. S16.** Product distribution after 26 h of photoreduction by TT-COF **(a)** different composition of acetonitrile/water as solvent under CO<sub>2</sub> atmosphere; **(b)** In presence of different sacrificial electron donor under CO<sub>2</sub> atmosphere; **(c)** Controlled catalytic experiments displays the importance of catalyst, light, CO<sub>2</sub> and TEA in the catalysis process.

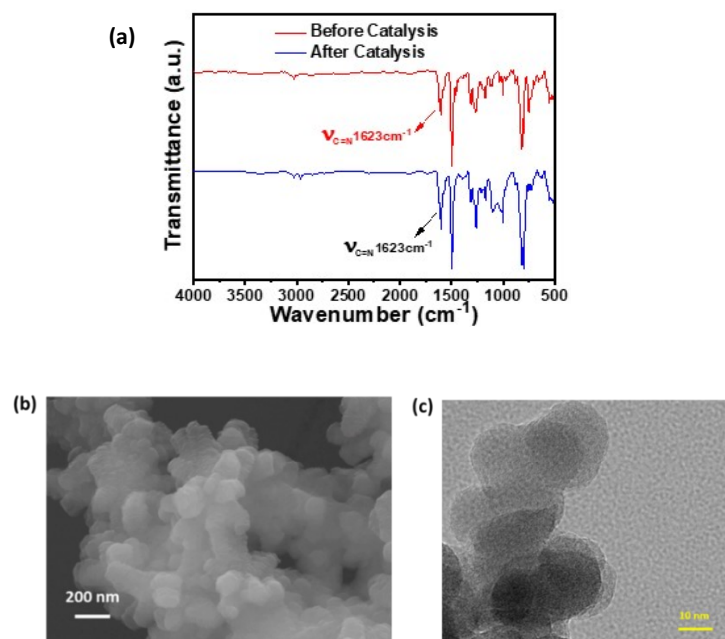

**Fig. S17.** Chemical and structural stability of TT-COF before and after 26 h irradiation **(a)** FTIR spectra reveals the existence of  $\text{-C=N}$  stretching band at  $1619\text{ cm}^{-1}$  after catalysis as like before catalysis **(b)** FESEM image after catalysis **(c)** HRTEM image after catalysis.

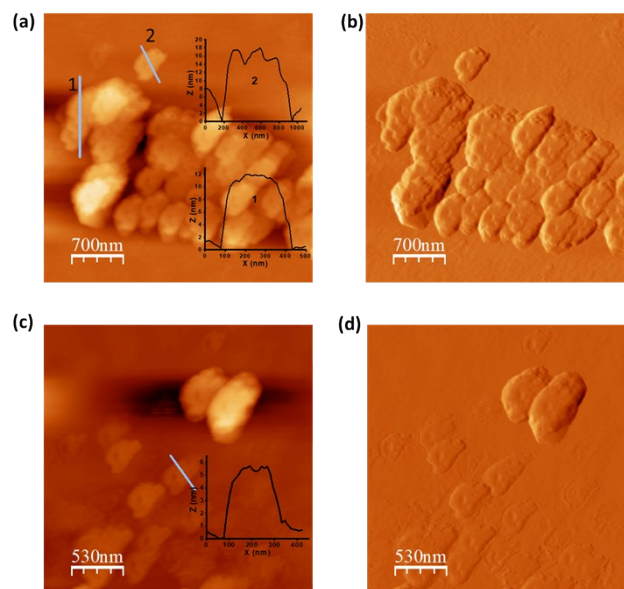

**Fig. S18.** AFM studies of TT-COF before and after 26 h irradiation **(a) & (b)** Before catalysis AFM images (height and amplitude) of TT-COF having  $\sim 12\text{-}18\text{ nm}$  height profile; **(c) & (d)**

After catalysis AFM images (height and amplitude) reveal exfoliated sheet kind of morphology having ~6 nm height profile.

### Reconversion of TT-COF after Photocatalysis:

After irradiation under visible light for 26 h the TT-COF was filtered washed with MeCN and THF. The organic filtrates were checked for any breakage of monomers from the framework (e.g., TPETP(CHO)<sub>4</sub> and TAPA), but no of monomeric species were detected. It was then vacuum-dried, and 15 mg of TT-COF was loaded into a pyrex tube measuring 10 × 8 mm (o.d × i.d). Then n-BuOH (0.5 mL) and o-dichlorobenzene (O-DCB) (0.5mL) were added and sonicated for 5 mins. After 0.1 mL aqueous acetic acid (6 M) and aniline (27 uL, 0.21 mmol) were added and sonicated for 5 mins. Next, tube was undergone three cycles of freeze-pump-thaw under liquid N<sub>2</sub> and 10<sup>-4</sup> mbar internal pressure. Then it was sealed by a flame and kept to 120 °C for 5 days. The orange solid was isolated by filtration and washed with dry THF and dried at 60 °C for 3 h to recovered TT-COF powder again. It displayed similar PXRD pattern and BET surface area of 707 m<sup>2</sup>g<sup>-1</sup> as earlier case.

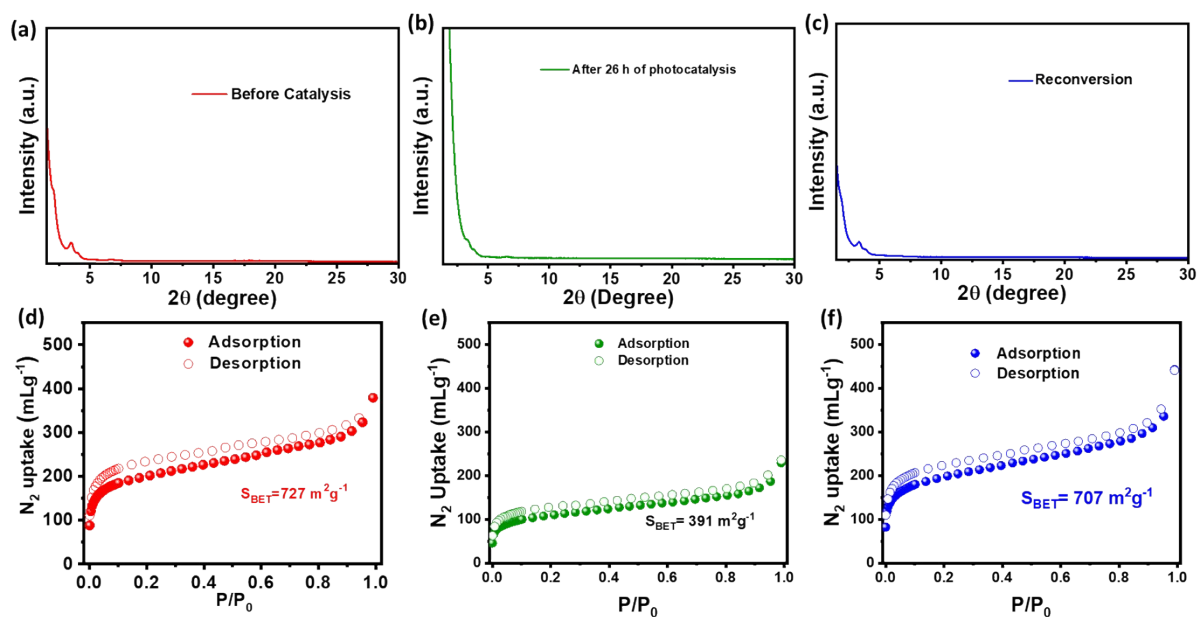

**Fig. S19.** Experimentally observed powder X-ray diffraction pattern of TT-COF for (a) before catalysis- crystalline polymer; (b) after 26 h of irradiation-less crystallinity; (d) after reconversion- crystalline polymer; BET surface area of TT-COF for (e) before catalysis; (f) after 26 h of irradiation; (g) after reconversion.

- ***In-situ* Diffuse Reflectance FTIR (DRIFT) Measurement:** *In-situ* diffuse reflectance FT-IR measurement was carried out by FT-IR spectrometer (BRUKER Vertex 70V) in the Praying Mentis chamber. One designed reaction cell containing with two ZnSe windows and one quartz window was fixed inside the Praying Mentis chamber. Then the MeCN solution of photocatalyst was drop casted over a glass slide and placed in the center of the designed reaction cell. After these 2 drops of TEA was added on top the sample. Next a high vacuum pump was used to pump out all the gases from the reaction cell. Then pure CO<sub>2</sub> (99.99%) gas and H<sub>2</sub>O vapor were passed into the reactor for 15 minutes. At last, visible light was turned on, and the IR signal was *in-situ* collected through MCT detector with 4 cm<sup>-1</sup> resolution and 64 scan after each 3 min of reaction time.

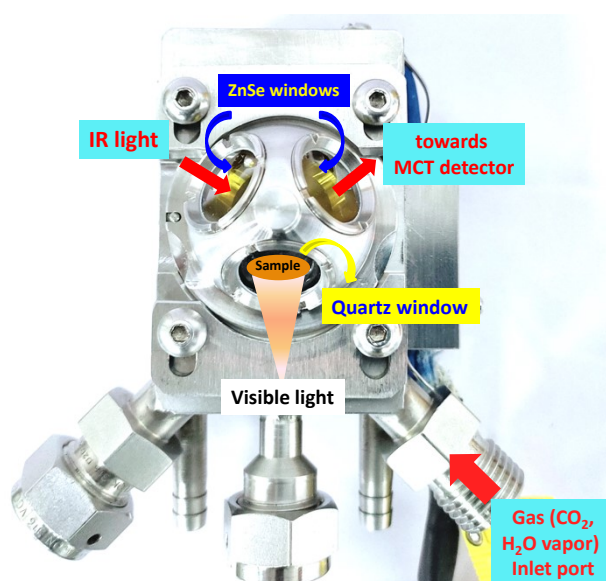



**Fig. S20.** Photograph of the set-up for *in-situ* DRIFTS.**Table S3.**

| System                          | $\lambda_{\text{ex}}$ | $\tau_1$ | $B_1$ | $\tau_2$ | $B_2$ | $\tau_3$ | $B_3$ | $\chi^2$ | $\tau_{\text{AVG}}$ |
|---------------------------------|-----------------------|----------|-------|----------|-------|----------|-------|----------|---------------------|
|                                 | nm                    | ns       | %     | ns       | %     | ns       | %     |          | ns                  |
| TT-COF @ Ar                     | 510                   | 0.377    | 3.79  | 3.289    | 88.69 | 28.36    | 7.52  | 1.122    | 5.06                |
| TT-COF@ CO <sub>2</sub>         | 510                   | 0.394    | 25.83 | 2.996    | 66.02 | 14.96    | 8.14  | 1.295    | 3.30                |
| TT-COF@<br>CO <sub>2</sub> -TEA | 510                   | 0.321    | 44.57 | 1.258    | 48.68 | 12.37    | 7.09  | 1.289    | 1.63                |

| COF           | Linkage  | Light source                               | Sacrificial agent | Photosensitizer                              | Product | Yield                                      | Ref.         |
|---------------|----------|--------------------------------------------|-------------------|----------------------------------------------|---------|--------------------------------------------|--------------|
| CTF           | Triazine | 450 W Xe lamp ( $\lambda \geq 420$ nm)     | None              | Rh[Cp*Rh(bpy)H <sub>2</sub> O] <sup>2+</sup> | HCOOH   | 204.14 $\mu\text{mol}$                     | <sup>2</sup> |
| CT-COF        | Imine    | 300 W Xe lamp ( $\lambda > 420$ nm)        | None              | None                                         | CO      | 102.7 $\mu\text{mol g}^{-1} \text{h}^{-1}$ | <sup>3</sup> |
| TFPG-DAAQ COF | Imine    | Blue LED light (445 nm)                    | TEOA              | Co(dm <sub>g</sub> ) <sub>2</sub>            | HCOOH   | 125 <sup>a</sup>                           | <sup>4</sup> |
| COF-367 NSs   | Imine    | 300 W Xe lamp ( $\lambda > 420$ nm)        | Ascorbic acid     | Ru(bpy) <sub>3</sub> Cl <sub>2</sub>         | CO      | 65 $\mu\text{mol g}^{-1} \text{h}^{-1}$    | <sup>5</sup> |
| TAPBB-COF     | Imine    | Xe lamp ( $200 \leq \lambda \leq 1000$ nm) | None              | None                                         | CO      | 24.6 $\mu\text{mol g}^{-1} \text{h}^{-1}$  | <sup>6</sup> |

|        |       |                                     |     |      |    |                                          |           |
|--------|-------|-------------------------------------|-----|------|----|------------------------------------------|-----------|
| TT-COF | Imine | 300 W Xe lamp ( $\lambda > 420$ nm) | TEA | None | CO | 248 $\mu\text{mol g}^{-1} \text{h}^{-1}$ | This work |
|--------|-------|-------------------------------------|-----|------|----|------------------------------------------|-----------|

**Table S4.** Emerging COFs Applied in the Photoreduction of  $\text{CO}_2$  as metal-free photocatalyst

<sup>a</sup>TON (calculated using calibration curve of known concentration of HCOOH).

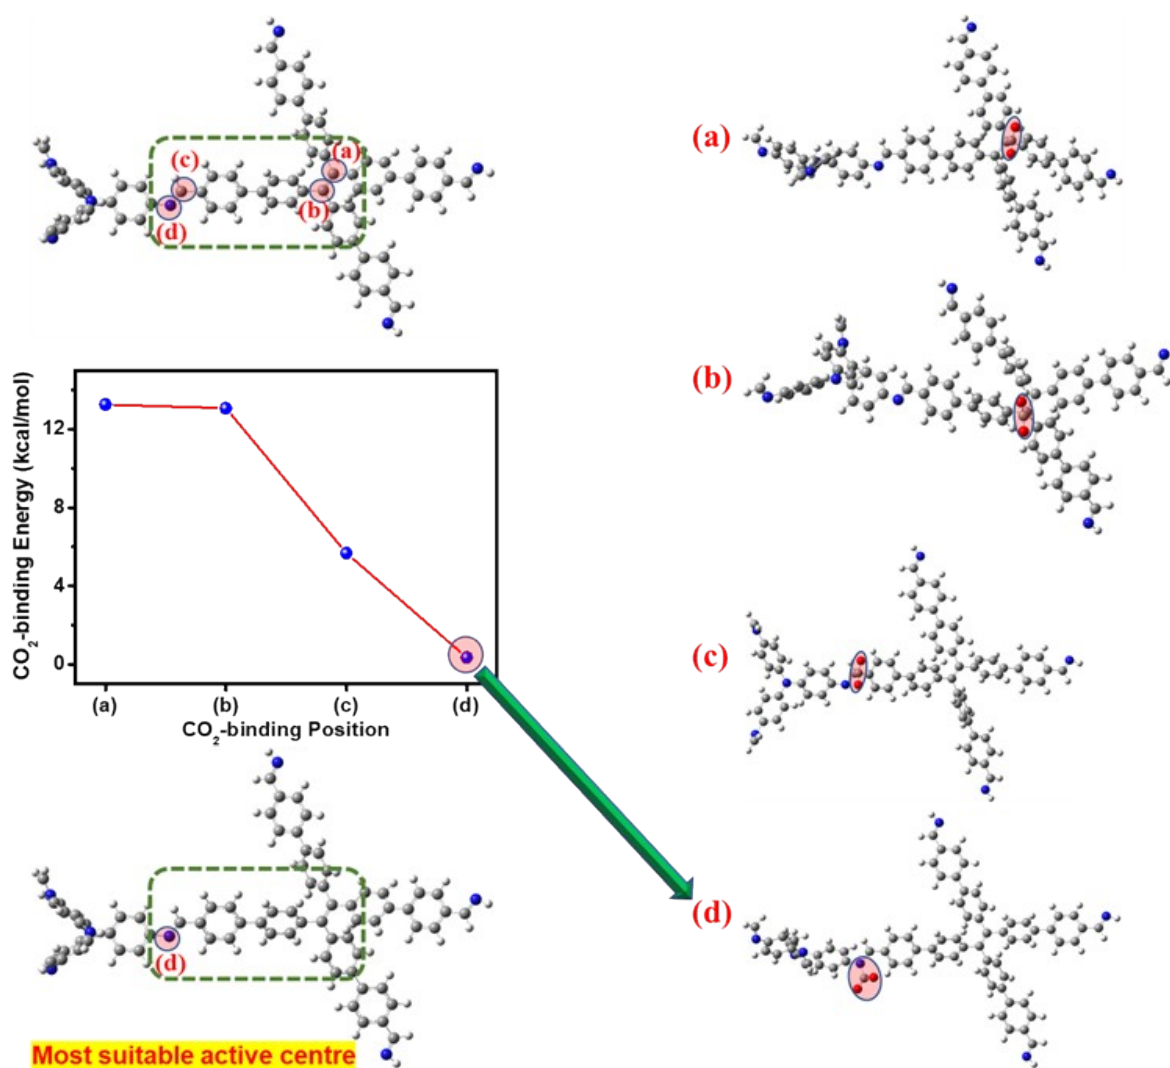

**Fig. S21.** Identification of the most suitable active centre for  $\text{CO}_2$ RR by  $\text{CO}_2$ -binding energy calculations with optimized structures of different  $\text{CO}_2$ -bound models (model-a to model-d).

### Computational Details:

All the calculations were performed using density functional theory (DFT) in Gaussian16 program package.<sup>7</sup> The geometry optimization and frequency calculations were performed utilizing B3LYP exchange-correlation functional along with 6-31+G\* basis set for all atoms.<sup>8-</sup><sup>13</sup> The implicit solvent effect of acetonitrile was incorporated into all computations by polarisable continuum model (PCM)<sup>14</sup> Grimme's d3 dispersion was also used to tackle weak interactions.<sup>9</sup> The harmonic vibrational frequency analysis of the optimized geometries was performed to confirm the nature of stationary points. All the optimized intermediates revealed the absence of any imaginary vibrational mode, indicating the optimized geometries as minima on the potential energy surface (PES). Time-dependent density functional theory (TDDFT) calculations were performed to assess the electronic absorption spectrum. For TDDFT calculations, the same level of theory to that of optimization and frequency calculations, was used. For the transition state of the CO<sub>2</sub>-binding step, the scan calculation and transition state calculation were also performed using the same level of theory. All thermochemical data were obtained with the ideal gas-rigid rotor-simple harmonic oscillator approximations at 298.15 K and 1 atm. Zero point-energy corrections were included in the Gibbs free energy values along with a concentration correction for  $c = 1 \text{ mol/ dm}^3$  condition in the solvent. The pictures of the optimized structures, molecular orbitals and spin density plots were taken from Gauss View 6.0.16.<sup>15</sup>

In **Fig. S16**, all the possible pathways for CO<sub>2</sub> photoreduction to CO on metal-free **TT-COF** catalyst were summarized.

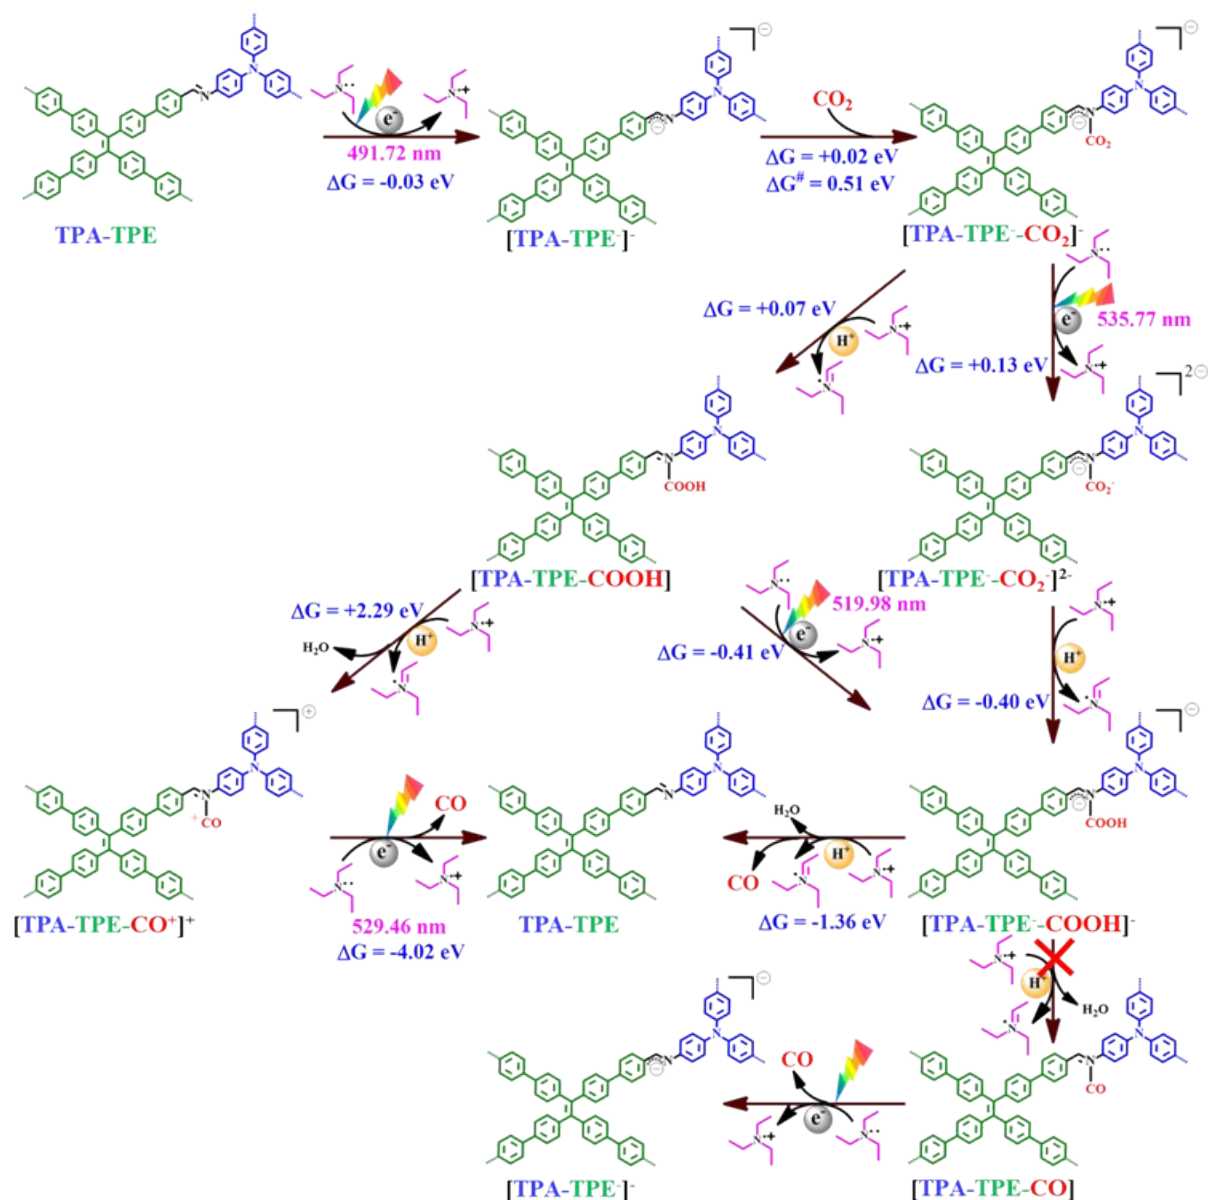

**Fig. S22.** Complete photocatalytic CO<sub>2</sub>-to-CO reduction mechanism with respective relative Gibbs free energy values in acetonitrile solvent and using TEA as the sacrificial electron donor.

### Cartesian coordinates of the computed structures

Coordinates are given in standard XYZ format

**Table-S5.** DFT-optimized geometry of TPA-TPE (singlet), computed at the B3LYP-D3/ 6-31+G\* level in acetonitrile solvent using PCM.

---

| Atom | x | y | z |
|------|---|---|---|
|------|---|---|---|

---

|   |              |             |             |
|---|--------------|-------------|-------------|
| N | -11.89753300 | -0.88601600 | 0.05730500  |
| C | -12.60443500 | -1.53400400 | 1.10322100  |
| C | -12.13995300 | -1.46893100 | 2.42736600  |
| C | -13.77137600 | -2.26930800 | 0.83028500  |
| C | -12.82958900 | -2.11012400 | 3.45419400  |
| H | -11.22849400 | -0.92212800 | 2.64914700  |
| C | -14.45652700 | -2.91262000 | 1.85660400  |
| H | -14.13249800 | -2.34153200 | -0.19100900 |
| C | -14.01087500 | -2.82506600 | 3.18603600  |
| H | -12.43794800 | -2.06652500 | 4.46655600  |
| H | -15.34950500 | -3.49154100 | 1.63707400  |
| C | -12.60797300 | -0.20867200 | -0.96720500 |
| C | -13.73355600 | 0.57382600  | -0.66005800 |
| C | -12.20881500 | -0.32271100 | -2.31058500 |
| C | -14.43479200 | 1.23511000  | -1.66599400 |
| H | -14.06521000 | 0.65423400  | 0.37068700  |
| C | -12.91292800 | 0.33545400  | -3.31442600 |
| H | -11.35016800 | -0.93685200 | -2.56393100 |
| C | -14.02148900 | 1.14190000  | -3.00726200 |
| H | -15.31673300 | 1.81431000  | -1.40747600 |
| H | -12.60817400 | 0.23166700  | -4.35226200 |
| C | -10.47933200 | -0.93589800 | 0.02349600  |
| C | -9.73135900  | 0.19949400  | -0.33028600 |
| C | -9.79732800  | -2.12760800 | 0.32549600  |
| C | -8.34016500  | 0.15023700  | -0.37102100 |
| H | -10.24574100 | 1.12069600  | -0.58715600 |
| C | -8.40762400  | -2.17516400 | 0.28433900  |
| H | -10.36294100 | -3.01730800 | 0.58516800  |
| C | -7.65111500  | -1.03449600 | -0.04245300 |
| H | -7.78841300  | 1.03479100  | -0.67615000 |
| H | -7.88679900  | -3.10251500 | 0.50711600  |
| N | -6.25086800  | -1.16474600 | -0.07201600 |
| C | -5.49915100  | -0.17243700 | 0.24963500  |
| C | -4.03643700  | -0.22359700 | 0.18293700  |
| H | -5.92211400  | 0.77460100  | 0.61355900  |
| C | -3.34112000  | -1.36437800 | -0.26366700 |
| C | -3.29182000  | 0.90185700  | 0.57851000  |
| C | -1.95236500  | -1.37423000 | -0.30690800 |
| H | -3.90386200  | -2.24251900 | -0.56508400 |
| C | -1.89939800  | 0.89079100  | 0.53154700  |
| H | -3.80935700  | 1.79695400  | 0.91666800  |
| C | -1.19996000  | -0.24757300 | 0.08975200  |
| H | -1.43862200  | -2.27499800 | -0.63091900 |

|   |             |             |             |
|---|-------------|-------------|-------------|
| H | -1.35081400 | 1.78312500  | 0.81931600  |
| C | 0.28145400  | -0.26090700 | 0.04141400  |
| C | 0.97166500  | -0.92932300 | -0.98756400 |
| C | 1.04533700  | 0.39171500  | 1.02784800  |
| C | 2.36413700  | -0.93537800 | -1.03266100 |
| H | 0.41487700  | -1.42865200 | -1.77573700 |
| C | 2.43638900  | 0.39351200  | 0.97479000  |
| H | 0.54697800  | 0.88212000  | 1.85958700  |
| C | 3.12425600  | -0.25595400 | -0.06509100 |
| H | 2.87090000  | -1.45411400 | -1.84219400 |
| H | 3.00240000  | 0.90062300  | 1.75059500  |
| C | 4.61263600  | -0.25627900 | -0.12415200 |
| C | 5.34815100  | 0.88755100  | 0.01811700  |
| C | 5.24366300  | -1.58679500 | -0.34742400 |
| C | 6.82146600  | 0.86486500  | 0.23591000  |
| C | 4.73020600  | 2.24191600  | -0.03291800 |
| C | 6.24439900  | -1.76658000 | -1.31845300 |
| C | 4.83007300  | -2.71200300 | 0.38659600  |
| C | 7.40231300  | 0.03215900  | 1.20831100  |
| C | 7.67190600  | 1.70445900  | -0.50400200 |
| C | 3.84079400  | 2.60001900  | -1.06113500 |
| C | 5.04669900  | 3.21473300  | 0.93106300  |
| C | 6.83066000  | -3.01223800 | -1.52477700 |
| H | 6.56019500  | -0.91900200 | -1.91943200 |
| C | 5.42222200  | -3.95750500 | 0.18842200  |
| H | 4.05117400  | -2.60340800 | 1.13670000  |
| C | 8.77955800  | 0.01579900  | 1.41110700  |
| H | 6.76325000  | -0.60437700 | 1.81311200  |
| C | 9.05135200  | 1.68222900  | -0.30978800 |
| H | 7.24802100  | 2.36533400  | -1.25547700 |
| C | 3.26591700  | 3.86712700  | -1.10589100 |
| H | 3.60330700  | 1.87567900  | -1.83457800 |
| C | 4.46476100  | 4.48007700  | 0.89386800  |
| H | 5.73923700  | 2.96793700  | 1.73146900  |
| C | 6.43936300  | -4.13338100 | -0.76850800 |
| H | 7.58359600  | -3.12071200 | -2.30063300 |
| H | 5.10701200  | -4.79706800 | 0.80196200  |
| C | 9.63559300  | 0.83346800  | 0.64917700  |
| H | 9.19252000  | -0.62147700 | 2.18825600  |
| H | 9.68307500  | 2.31434600  | -0.92779200 |
| C | 3.55739800  | 4.83201300  | -0.12305600 |
| H | 2.60186500  | 4.11809300  | -1.92850900 |
| H | 4.69966800  | 5.19386100  | 1.67867200  |
| C | 7.07470500  | -5.45652900 | -0.97889300 |

|   |              |              |             |
|---|--------------|--------------|-------------|
| C | 11.10372200  | 0.80464500   | 0.85516100  |
| C | 2.93147500   | 6.17568200   | -0.16141600 |
| C | 8.44751300   | -5.56203800  | -1.26705200 |
| C | 6.32105400   | -6.64686600  | -0.89539400 |
| C | 11.76967200  | -0.39902900  | 1.14917600  |
| C | 11.87461600  | 1.98309500   | 0.76091000  |
| C | 3.65453100   | 7.32658500   | 0.21881000  |
| C | 1.59740100   | 6.34027300   | -0.57609700 |
| C | 9.04234900   | -6.80702400  | -1.46669800 |
| H | 9.05976600   | -4.66596300  | -1.31328200 |
| C | 6.91368700   | -7.88857800  | -1.09353600 |
| H | 5.25436400   | -6.59319400  | -0.69649900 |
| C | 13.14999700  | -0.42317500  | 1.34351300  |
| H | 11.20823700  | -1.32734000  | 1.20408100  |
| C | 13.25103700  | 1.95959400   | 0.95371700  |
| H | 11.38318600  | 2.93040800   | 0.55747300  |
| C | 3.06917300   | 8.58697500   | 0.18607600  |
| H | 4.69384300   | 7.23164400   | 0.52070900  |
| C | 1.01001100   | 7.60418900   | -0.60996000 |
| H | 1.00684300   | 5.47141600   | -0.85227100 |
| C | 8.28681400   | -7.98795800  | -1.38390300 |
| H | 10.10748800  | -6.86344000  | -1.68061000 |
| H | 6.31779800   | -8.79417000  | -1.03459300 |
| C | 13.91170900  | 0.75299000   | 1.24941200  |
| H | 13.64335500  | -1.36769500  | 1.56238800  |
| H | 13.82734000  | 2.87716400   | 0.88608900  |
| C | 1.73435400   | 8.74563100   | -0.22958800 |
| H | 3.64206100   | 9.46312300   | 0.47378200  |
| H | -0.02587100  | 7.70481500   | -0.92658000 |
| C | 8.94941100   | -9.28519100  | -1.60303900 |
| C | 15.36787400  | 0.68794400   | 1.46256100  |
| C | 1.07982900   | 10.06448500  | -0.27635900 |
| H | 10.02465200  | -9.22260900  | -1.81923000 |
| H | 15.75677400  | -0.31571800  | 1.68205700  |
| H | 0.03589200   | 10.04899500  | -0.61807600 |
| N | 1.67193300   | 11.15425000  | 0.05366800  |
| H | 1.03755900   | 11.94933100  | -0.05274200 |
| N | 16.13373600  | 1.71588100   | 1.40069800  |
| H | 17.10389900  | 1.44692600   | 1.58040800  |
| N | 8.33010900   | -10.40798500 | -1.54961100 |
| H | 8.97658300   | -11.17921200 | -1.73194200 |
| N | -14.69566600 | 1.77491800   | -4.07906300 |
| N | -14.75126900 | -3.51149700  | 4.17834000  |
| C | -15.18608400 | 2.94364100   | -3.92456100 |

|   |              |             |             |
|---|--------------|-------------|-------------|
| H | -15.08075100 | 3.53358500  | -3.00508700 |
| H | -15.73415600 | 3.39777200  | -4.74977100 |
| C | -14.88603900 | -3.00205000 | 5.34132600  |
| H | -15.42708200 | -3.56349200 | 6.10267000  |
| H | -14.49571500 | -2.01626500 | 5.62496300  |

Sum of electronic and thermal Free Energies = -3235.524673 (Hartree/Particle).

From TDDFT calculation in acetonitrile,  $\lambda_{\text{abs}} = 491.72$  nm.

From TDDFT calculation in absence of any solvent,  $\lambda_{\text{abs}} = 493.27$  nm.

**Table-S6.** DFT-optimized geometry of [TPA-TPE]<sup>-</sup> (doublet), computed at the UB3LYP-D3/6-31+G\* level in acetonitrile solvent using PCM. The spin density plot is also shown below.

(Isovalue = 0.0004)

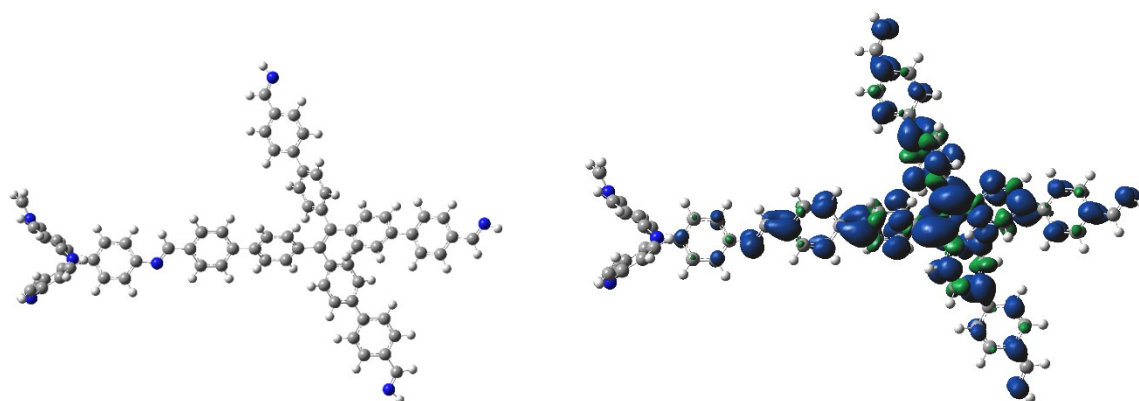

Spin Density Distribution

| Atom | x            | y           | z          |
|------|--------------|-------------|------------|
| N    | -11.91225000 | -1.00677500 | 0.29498400 |
| C    | -12.59377600 | -1.64951000 | 1.35880600 |
| C    | -12.08224600 | -1.60323500 | 2.66694000 |
| C    | -13.78046300 | -2.36684100 | 1.12265600 |
| C    | -12.74534700 | -2.24167400 | 3.71264800 |
| H    | -11.15468500 | -1.07330200 | 2.86082400 |
| C    | -14.43855700 | -3.00761900 | 2.16793400 |
| H    | -14.17828900 | -2.42765600 | 0.11439400 |
| C    | -13.94630900 | -2.93669600 | 3.48189500 |



|   |              |             |             |
|---|--------------|-------------|-------------|
| H | -12.31677800 | -2.21201400 | 4.71046300  |
| H | -15.34687800 | -3.57219800 | 1.97539100  |
| C | -12.63822900 | -0.33218300 | -0.71873700 |
| C | -13.76716600 | 0.44164000  | -0.39957400 |
| C | -12.24826200 | -0.43445200 | -2.06615100 |
| C | -14.48019000 | 1.10362900  | -1.39651400 |
| H | -14.09182900 | 0.51518100  | 0.63386500  |
| C | -12.96480200 | 0.22405300  | -3.06092300 |
| H | -11.38641000 | -1.03974800 | -2.32951900 |
| C | -14.07683300 | 1.02090600  | -2.74160800 |
| H | -15.36373900 | 1.67563300  | -1.12754500 |
| H | -12.66644900 | 0.12865800  | -4.10146200 |
| C | -10.49219900 | -1.05666500 | 0.23267700  |
| C | -9.75002900  | 0.09030000  | -0.09068000 |
| C | -9.80713500  | -2.25935700 | 0.47553400  |
| C | -8.35963900  | 0.04144900  | -0.16169200 |
| H | -10.26906500 | 1.02064700  | -0.30250900 |
| C | -8.41833000  | -2.30644300 | 0.40815100  |
| H | -10.37032700 | -3.15712100 | 0.71288500  |
| C | -7.66325400  | -1.15548400 | 0.10862600  |
| H | -7.81309300  | 0.93628300  | -0.44552300 |
| H | -7.89503200  | -3.24183200 | 0.58786700  |
| N | -6.26701000  | -1.28590700 | 0.04426800  |
| C | -5.50595500  | -0.29792600 | 0.38069300  |
| C | -4.05412300  | -0.32990700 | 0.27553500  |
| H | -5.92792500  | 0.63097300  | 0.79088300  |
| C | -3.35108300  | -1.44007600 | -0.24328100 |
| C | -3.30188200  | 0.78307000  | 0.70431700  |
| C | -1.96689600  | -1.43237400 | -0.32249200 |
| H | -3.91010100  | -2.31195600 | -0.57013400 |
| C | -1.91450400  | 0.79117200  | 0.61948700  |
| H | -3.81769900  | 1.65756800  | 1.09644400  |
| C | -1.20127400  | -0.31720700 | 0.10520400  |
| H | -1.46072300  | -2.31691100 | -0.69813500 |
| H | -1.37629400  | 1.68167800  | 0.93026900  |
| C | 0.26606000   | -0.31309700 | 0.01668900  |
| C | 0.95833700   | -1.08257600 | -0.94831000 |
| C | 1.06240200   | 0.46252700  | 0.89401200  |
| C | 2.34359800   | -1.06860600 | -1.03706300 |
| H | 0.39903600   | -1.67111900 | -1.67099200 |
| C | 2.44559000   | 0.47522500  | 0.80470400  |
| H | 0.58848700   | 1.03422600  | 1.68784400  |
| C | 3.14580800   | -0.28242600 | -0.17031500 |
| H | 2.82478300   | -1.65174800 | -1.81758900 |

|   |             |             |             |
|---|-------------|-------------|-------------|
| H | 3.01610400  | 1.07082800  | 1.51148100  |
| C | 4.60517600  | -0.22935000 | -0.28030300 |
| C | 5.32209700  | 0.96444800  | 0.00729900  |
| C | 5.31409100  | -1.44736900 | -0.70125300 |
| C | 6.68931000  | 0.91153300  | 0.54111300  |
| C | 4.72007100  | 2.28341700  | -0.22447400 |
| C | 6.47203500  | -1.38477000 | -1.51499600 |
| C | 4.89840700  | -2.74161500 | -0.30502800 |
| C | 7.09695700  | -0.11303500 | 1.43201400  |
| C | 7.68133600  | 1.85882500  | 0.18586000  |
| C | 3.82869200  | 2.51246500  | -1.30317100 |
| C | 4.97662800  | 3.39428300  | 0.61714600  |
| C | 7.17102300  | -2.52456800 | -1.88791300 |
| H | 6.81366100  | -0.41452900 | -1.86396200 |
| C | 5.59499600  | -3.88443800 | -0.67996300 |
| H | 4.02776500  | -2.84297700 | 0.33724700  |
| C | 8.39580600  | -0.19581700 | 1.91350200  |
| H | 6.36421200  | -0.84715600 | 1.75448700  |
| C | 8.98156700  | 1.77896000  | 0.66926300  |
| H | 7.42752300  | 2.65336300  | -0.51060700 |
| C | 3.22963400  | 3.74606400  | -1.51363600 |
| H | 3.62049300  | 1.69795000  | -1.99088800 |
| C | 4.37943300  | 4.63103200  | 0.40612400  |
| H | 5.63539400  | 3.26818100  | 1.47207200  |
| C | 6.75759900  | -3.81221300 | -1.47841900 |
| H | 8.03374100  | -2.41868000 | -2.54092900 |
| H | 5.25306800  | -4.84849000 | -0.31176300 |
| C | 9.38369400  | 0.74545000  | 1.54463000  |
| H | 8.64079000  | -0.98391700 | 2.62115000  |
| H | 9.71008000  | 2.51028700  | 0.32822700  |
| C | 3.48167000  | 4.84711100  | -0.66315100 |
| H | 2.58253200  | 3.87099400  | -2.37827600 |
| H | 4.58285100  | 5.43438900  | 1.10975400  |
| C | 7.50740400  | -5.02220100 | -1.86537900 |
| C | 10.76581000 | 0.65095600  | 2.04922000  |
| C | 2.83779900  | 6.15485100  | -0.88203500 |
| C | 8.90400700  | -4.98719600 | -2.06524600 |
| C | 6.85471700  | -6.26469800 | -2.05073600 |
| C | 11.34984400 | -0.59562900 | 2.36236300  |
| C | 11.56146000 | 1.80684100  | 2.23992200  |
| C | 3.47746100  | 7.36263800  | -0.51048500 |
| C | 1.55851100  | 6.25522300  | -1.47109700 |
| C | 9.60803800  | -6.13083300 | -2.43325100 |
| H | 9.44860700  | -4.06125600 | -1.90507400 |

|   |              |              |             |
|---|--------------|--------------|-------------|
| C | 7.55695400   | -7.40604400  | -2.41430800 |
| H | 5.77655500   | -6.32559800  | -1.93305100 |
| C | 12.65372000  | -0.68068100  | 2.84307100  |
| H | 10.78653700  | -1.51040800  | 2.20306700  |
| C | 12.86297900  | 1.72195300   | 2.71566800  |
| H | 11.13919100  | 2.78680100   | 2.03664600  |
| C | 2.87495900   | 8.59640500   | -0.71531500 |
| H | 4.47413300   | 7.32997300   | -0.07976700 |
| C | 0.95564900   | 7.49268600   | -1.67986400 |
| H | 1.01836200   | 5.35346600   | -1.74418200 |
| C | 8.95121100   | -7.36118800  | -2.61360400 |
| H | 10.68592400  | -6.07309600  | -2.57151900 |
| H | 7.03143500   | -8.34510600  | -2.56023400 |
| C | 13.43635900  | 0.47315100   | 3.02857400  |
| H | 13.07729300  | -1.65775400  | 3.06730500  |
| H | 13.44895100  | 2.62435200   | 2.86268300  |
| C | 1.59862800   | 8.68672100   | -1.30643000 |
| H | 3.39173400   | 9.50799300   | -0.43039500 |
| H | -0.03483000  | 7.53503400   | -2.12882600 |
| C | 9.72900900   | -8.54542900  | -2.99895000 |
| C | 14.80730500  | 0.34299500   | 3.53646200  |
| C | 0.92985800   | 9.97181900   | -1.54114000 |
| H | 10.80672300  | -8.36769600  | -3.11919900 |
| H | 15.12687500  | -0.68918800  | 3.73678300  |
| H | -0.06329100  | 9.89451700   | -2.00518500 |
| N | 1.44785800   | 11.10943300  | -1.23584000 |
| H | 0.80914500   | 11.86703100  | -1.48818600 |
| N | 15.58835400  | 1.34512700   | 3.73881200  |
| H | 16.49155000  | 1.02255800   | 4.09358900  |
| N | 9.20890000   | -9.70691100  | -3.18566000 |
| H | 9.93291400   | -10.37987500 | -3.44743300 |
| N | -14.76243000 | 1.65547000   | -3.80523900 |
| N | -14.66354900 | -3.61888600  | 4.49391700  |
| C | -15.26652800 | 2.81688200   | -3.63924400 |
| H | -15.16548300 | 3.40044700   | -2.71523300 |
| H | -15.82280200 | 3.27123300   | -4.45884200 |
| C | -14.74074200 | -3.12343800  | 5.66829400  |
| H | -15.26542600 | -3.68312400  | 6.44229500  |
| H | -14.31608600 | -2.15152200  | 5.95049700  |

---

Sum of electronic and thermal Free Energies = -3235.625227 (Hartree/Particle).

**Table-S7.** DFT-optimized geometry of [TPA-TPE<sup>-</sup>-CO<sub>2</sub>]<sup>-</sup> (doublet) **model-d**, computed at the UB3LYP-D3/ 6-31+G\* level in acetonitrile solvent using PCM. The spin density plot is also shown below. (Isovalue = 0.0004)

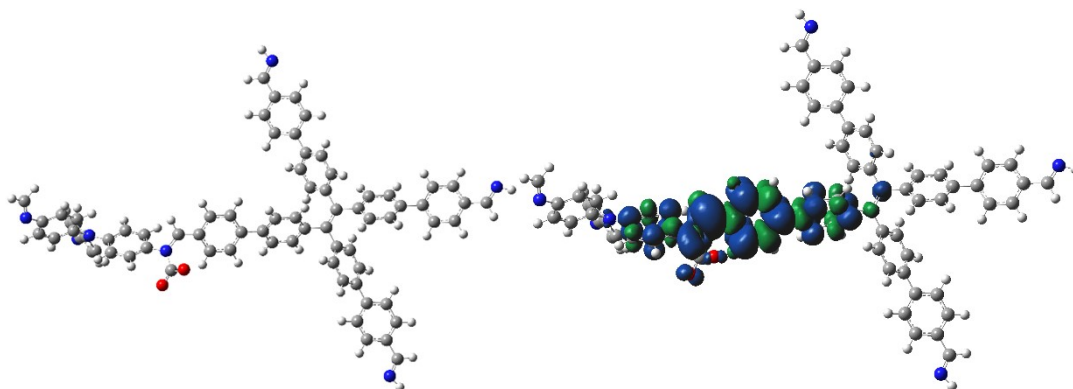

Spin Density Distribution

| Atom | x            | y           | z           |
|------|--------------|-------------|-------------|
| N    | -11.28376400 | -0.73879700 | -0.37440600 |
| C    | -12.34269000 | -0.42487100 | 0.51143100  |
| C    | -12.10985200 | 0.35940300  | 1.65492800  |
| C    | -13.64183300 | -0.91622100 | 0.28505900  |
| C    | -13.14658100 | 0.65940800  | 2.53570300  |
| H    | -11.10804100 | 0.72484000  | 1.85847700  |
| C    | -14.67420800 | -0.61920600 | 1.16920600  |
| H    | -13.83520500 | -1.54084000 | -0.58150700 |
| C    | -14.45104400 | 0.19161300  | 2.29479000  |
| H    | -12.93413700 | 1.24670000  | 3.42459600  |
| H    | -15.67122800 | -1.01485800 | 0.99489600  |
| C    | -11.49619000 | -0.78113800 | -1.77395900 |
| C    | -12.33387700 | 0.15468800  | -2.40585800 |
| C    | -10.87357200 | -1.76736400 | -2.56081200 |
| C    | -12.53564200 | 0.11307900  | -3.78354300 |
| H    | -12.83579800 | 0.91234500  | -1.81197000 |
| C    | -11.08143500 | -1.81028200 | -3.93611900 |
| H    | -10.23287800 | -2.50424600 | -2.08654800 |
| C    | -11.89580100 | -0.85933000 | -4.57340000 |
| H    | -13.20687100 | 0.83277800  | -4.24375200 |
| H    | -10.60860300 | -2.58442100 | -4.53454600 |
| C    | -9.98624900  | -1.01372700 | 0.14742700  |
| C    | -8.84901000  | -0.41528900 | -0.41061700 |

|   |              |             |             |
|---|--------------|-------------|-------------|
| C | -9.82282700  | -1.89236100 | 1.23179800  |
| C | -7.58064500  | -0.69767700 | 0.09467700  |
| H | -8.95668700  | 0.25962700  | -1.25489400 |
| C | -8.56129000  | -2.15217100 | 1.75591900  |
| H | -10.69742200 | -2.35935000 | 1.67569900  |
| C | -7.41334600  | -1.56292700 | 1.19120900  |
| H | -6.70717600  | -0.24346400 | -0.36398300 |
| H | -8.45820300  | -2.82718800 | 2.59762400  |
| N | -6.12158400  | -1.77447800 | 1.73103000  |
| C | -5.28219200  | -0.67272000 | 1.80251900  |
| C | -3.88549700  | -0.66717500 | 1.57673000  |
| H | -5.78006800  | 0.27986800  | 1.97493400  |
| C | -3.15118600  | -1.77976400 | 1.06913400  |
| C | -3.14388500  | 0.52745100  | 1.82277400  |
| C | -1.78777000  | -1.69660600 | 0.83962800  |
| H | -3.66809700  | -2.70872600 | 0.85465200  |
| C | -1.77921200  | 0.59555400  | 1.59788300  |
| H | -3.66942700  | 1.40644900  | 2.19091000  |
| C | -1.05363700  | -0.51506100 | 1.10224000  |
| H | -1.26920600  | -2.57689900 | 0.46862800  |
| H | -1.26445800  | 1.53525200  | 1.78065700  |
| C | 0.40074000   | -0.43955800 | 0.86224700  |
| C | 1.01949700   | -1.18834500 | -0.16175900 |
| C | 1.23442100   | 0.38066400  | 1.65294800  |
| C | 2.39192400   | -1.11588100 | -0.38466800 |
| H | 0.41593000   | -1.81755700 | -0.80987700 |
| C | 2.60328600   | 0.46365100  | 1.41796500  |
| H | 0.81009300   | 0.94002200  | 2.48209100  |
| C | 3.21231900   | -0.27165700 | 0.38501200  |
| H | 2.83386600   | -1.70349100 | -1.18539900 |
| H | 3.21677500   | 1.10077600  | 2.04857400  |
| C | 4.67600600   | -0.18958700 | 0.13186100  |
| C | 5.34363300   | 1.00273600  | 0.06207800  |
| C | 5.37022300   | -1.49657500 | -0.04054300 |
| C | 6.83071000   | 1.08416700  | 0.08805700  |
| C | 4.63403700   | 2.30770700  | -0.04722400 |
| C | 6.24608700   | -1.72234700 | -1.11678800 |
| C | 5.14151700   | -2.55637200 | 0.85400600  |
| C | 7.58386200   | 0.39282800  | 1.05332000  |
| C | 7.52449500   | 1.88332700  | -0.83733000 |
| C | 3.60014700   | 2.50054800  | -0.98056100 |
| C | 5.00351900   | 3.39913300  | 0.75796800  |
| C | 6.89248100   | -2.94541200 | -1.27409600 |
| H | 6.41640600   | -0.92882900 | -1.83840300 |

|   |             |             |             |
|---|-------------|-------------|-------------|
| C | 5.79490700  | -3.77771600 | 0.70448200  |
| H | 4.46065900  | -2.41221400 | 1.68870400  |
| C | 8.97387700  | 0.46938900  | 1.07187800  |
| H | 7.06970400  | -0.20749600 | 1.79803100  |
| C | 8.91583200  | 1.95428200  | -0.82641800 |
| H | 6.96672700  | 2.43644800  | -1.58843900 |
| C | 2.94100400  | 3.72236800  | -1.08211100 |
| H | 3.31549100  | 1.68132900  | -1.63411700 |
| C | 4.33906900  | 4.62028600  | 0.66447700  |
| H | 5.80601800  | 3.28134900  | 1.48137200  |
| C | 6.68888900  | -3.99702900 | -0.36050800 |
| H | 7.54398100  | -3.09348500 | -2.13107300 |
| H | 5.62659500  | -4.56117300 | 1.43828300  |
| C | 9.67129200  | 1.24385100  | 0.12542300  |
| H | 9.52281200  | -0.05887300 | 1.84676000  |
| H | 9.42150600  | 2.54836400  | -1.58277300 |
| C | 3.28909600  | 4.80669500  | -0.25410700 |
| H | 2.16289500  | 3.84328200  | -1.83090200 |
| H | 4.62315400  | 5.42981200  | 1.33130900  |
| C | 7.38970800  | -5.29415700 | -0.51836200 |
| C | 11.15241400 | 1.31133300  | 0.13465900  |
| C | 2.57471900  | 6.10232900  | -0.35027000 |
| C | 8.71634500  | -5.34811500 | -0.98309000 |
| C | 6.74707700  | -6.51106500 | -0.20491900 |
| C | 11.92592300 | 0.17932200  | 0.44954500  |
| C | 11.82820300 | 2.51135500  | -0.17411000 |
| C | 3.26132600  | 7.32555100  | -0.19388800 |
| C | 1.19067600  | 6.14833200  | -0.59776000 |
| C | 9.37365100  | -6.56887700 | -1.12916300 |
| H | 9.24654500  | -4.42762800 | -1.21008900 |
| C | 7.40212900  | -7.72850900 | -0.34951700 |
| H | 5.71482300  | -6.50078100 | 0.13355800  |
| C | 13.31852200 | 0.24460200  | 0.45703500  |
| H | 11.43592800 | -0.76535500 | 0.66741900  |
| C | 13.21669600 | 2.57690900  | -0.16773200 |
| H | 11.25533600 | 3.40680000  | -0.39846500 |
| C | 2.59355100  | 8.54156100  | -0.28127400 |
| H | 4.33451700  | 7.32006100  | -0.02496900 |
| C | 0.52043200  | 7.36755200  | -0.68620800 |
| H | 0.62929700  | 5.22386300  | -0.69844100 |
| C | 8.72908800  | -7.77645800 | -0.81493200 |
| H | 10.40231300 | -6.58409500 | -1.48286600 |
| H | 6.88987200  | -8.65573600 | -0.11200000 |
| C | 13.98522900 | 1.44165900  | 0.14897800  |

|   |              |              |             |
|---|--------------|--------------|-------------|
| H | 13.89536300  | -0.64628100  | 0.69597800  |
| H | 13.72076700  | 3.51012400   | -0.39945800 |
| C | 1.20907400   | 8.58141200   | -0.52929200 |
| H | 3.13846200   | 9.47362200   | -0.16688600 |
| H | -0.55171900  | 7.37698600   | -0.87012100 |
| C | 9.45614200   | -9.04677600  | -0.98067000 |
| C | 15.45772900  | 1.47210000   | 0.16632900  |
| C | 0.46681100   | 9.84979700   | -0.62780100 |
| H | 10.48643600  | -8.94349000  | -1.34767500 |
| H | 15.93511200  | 0.51707600   | 0.42483300  |
| H | -0.60966100  | 9.74027700   | -0.81779600 |
| N | 1.02226900   | 11.00008700  | -0.50328100 |
| H | 0.32710400   | 11.74300500  | -0.60644600 |
| N | 16.14168700  | 2.52547600   | -0.09784300 |
| H | 17.14228800  | 2.32586300   | -0.02829500 |
| N | 8.93821900   | -10.19187900 | -0.72054400 |
| H | 9.61377700   | -10.93713500 | -0.90512900 |
| N | -12.06606400 | -0.96760600  | -5.97465300 |
| N | -15.54777300 | 0.44542000   | 3.15321700  |
| C | -12.17121100 | 0.08475900   | -6.69037700 |
| H | -12.09115800 | 1.10463200   | -6.29282700 |
| H | -12.33944500 | -0.02198600  | -7.76179900 |
| C | -15.65463100 | 1.57425600   | 3.74083800  |
| H | -16.48657200 | 1.73396900   | 4.42641100  |
| H | -14.95935600 | 2.41006600   | 3.59054200  |
| C | -5.76652200  | -3.08295400  | 2.34564300  |
| O | -4.91407600  | -3.03235100  | 3.26035200  |
| O | -6.36329200  | -4.07687500  | 1.86762000  |

---

Sum of electronic and thermal Free Energies = -3424.227320 (Hartree/Particle).

From TDDFT calculation in acetonitrile,  $\lambda_{\text{abs}} = 535.77$  nm.

**Table-S8.** DFT-optimized geometry of **model-a** (doublet), computed at the UB3LYP-D3/ 6-31+G\* level in acetonitrile solvent using PCM.

---

| Atom | x            | y           | z           |
|------|--------------|-------------|-------------|
| N    | -12.49490800 | -0.93131100 | -0.21538300 |

---

|   |              |             |             |
|---|--------------|-------------|-------------|
| C | -13.29339800 | -1.35090700 | 0.87896500  |
| C | -12.92585300 | -1.03039600 | 2.19670100  |
| C | -14.45581300 | -2.11372000 | 0.66759500  |
| C | -13.70478000 | -1.44865500 | 3.27339000  |
| H | -12.01941300 | -0.46047800 | 2.37663300  |
| C | -15.23018700 | -2.53379500 | 1.74477300  |
| H | -14.74318900 | -2.38358700 | -0.34394200 |
| C | -14.88127000 | -2.18991000 | 3.06146100  |
| H | -13.38647500 | -1.21010800 | 4.28428900  |
| H | -16.11904700 | -3.13545100 | 1.57534700  |
| C | -13.10590400 | -0.47872800 | -1.41303400 |
| C | -14.23953500 | 0.35002700  | -1.37070500 |
| C | -12.59562800 | -0.86412000 | -2.66531400 |
| C | -14.84043600 | 0.79223600  | -2.54729000 |
| H | -14.65625300 | 0.63951600  | -0.41078500 |
| C | -13.19988700 | -0.42498800 | -3.83943200 |
| H | -11.72904700 | -1.51638400 | -2.71254900 |
| C | -14.31617500 | 0.42707400  | -3.80045900 |
| H | -15.73058100 | 1.41233000  | -2.48964700 |
| H | -12.80925900 | -0.73818800 | -4.80384600 |
| C | -11.07850300 | -0.98220200 | -0.12018800 |
| C | -10.29067700 | 0.06957100  | -0.61559400 |
| C | -10.43891000 | -2.09433800 | 0.45420300  |
| C | -8.90137700  | 0.01841400  | -0.53001100 |
| H | -10.77132900 | 0.92456300  | -1.08179400 |
| C | -9.05117000  | -2.14422300 | 0.53926300  |
| H | -11.03557400 | -2.92136100 | 0.82719700  |
| C | -8.25630900  | -1.08165200 | 0.07024900  |
| H | -8.31467300  | 0.83183600  | -0.94731000 |
| H | -8.56203200  | -3.01162900 | 0.97431400  |
| N | -6.86004200  | -1.20740100 | 0.18124500  |
| C | -6.13224000  | -0.16768600 | 0.39385000  |
| C | -4.67140600  | -0.21131400 | 0.45804900  |
| H | -6.58208800  | 0.82194300  | 0.55778000  |
| C | -3.93978800  | -1.39970000 | 0.26006200  |
| C | -3.95976500  | 0.97227100  | 0.72729500  |
| C | -2.55327900  | -1.39803400 | 0.33169700  |
| H | -4.47523400  | -2.32307000 | 0.06088800  |
| C | -2.56943400  | 0.97269700  | 0.79675700  |
| H | -4.50308200  | 1.90353000  | 0.87302200  |
| C | -1.83043500  | -0.21225700 | 0.60136400  |
| H | -2.01798800  | -2.33423200 | 0.20218000  |
| H | -2.05059300  | 1.90909400  | 0.97901800  |
| C | -0.35664900  | -0.21634000 | 0.67378800  |



|   |             |             |             |
|---|-------------|-------------|-------------|
| C | 0.42037400  | -1.09527900 | -0.11281800 |
| C | 0.34391700  | 0.66745800  | 1.52623400  |
| C | 1.80522100  | -1.09302500 | -0.05233800 |
| H | -0.06862500 | -1.76651200 | -0.81374200 |
| C | 1.72646200  | 0.67001300  | 1.59835900  |
| H | -0.21007200 | 1.34813900  | 2.16709900  |
| C | 2.52528000  | -0.21839600 | 0.81656800  |
| H | 2.35292600  | -1.76301300 | -0.70603200 |
| H | 2.19994800  | 1.36848300  | 2.27732400  |
| C | 3.95691300  | -0.20370200 | 0.84190500  |
| C | 4.73407100  | 0.83943100  | 1.67800600  |
| C | 4.71834800  | -1.21488600 | 0.07581800  |
| C | 6.25681000  | 0.53503100  | 1.64384700  |
| C | 4.47889500  | 2.26802300  | 1.15901000  |
| C | 5.62695100  | -0.83383500 | -0.92970200 |
| C | 4.63137700  | -2.58368200 | 0.38933500  |
| C | 6.75887500  | -0.64002700 | 2.23222700  |
| C | 7.16850500  | 1.33674700  | 0.94229300  |
| C | 3.93202000  | 2.49251400  | -0.11420700 |
| C | 4.87711300  | 3.40338600  | 1.88773100  |
| C | 6.46199000  | -1.76480600 | -1.53894600 |
| H | 5.69802400  | 0.21089800  | -1.21483700 |
| C | 5.46901800  | -3.51799900 | -0.21726300 |
| H | 3.93879100  | -2.90561500 | 1.16163200  |
| C | 8.08438800  | -1.02811500 | 2.06551900  |
| H | 6.08382100  | -1.27920400 | 2.78921200  |
| C | 8.50252800  | 0.95580300  | 0.78063800  |
| H | 6.83390400  | 2.24938100  | 0.46232600  |
| C | 3.75526400  | 3.77963800  | -0.62470500 |
| H | 3.63881400  | 1.65088900  | -0.73272900 |
| C | 4.70388200  | 4.69082600  | 1.38277000  |
| H | 5.31993300  | 3.27019700  | 2.86544200  |
| C | 6.42449300  | -3.12275900 | -1.17179600 |
| H | 7.15677200  | -1.43220300 | -2.30554200 |
| H | 5.41758300  | -4.55715200 | 0.09705000  |
| C | 8.98269700  | -0.25139700 | 1.31115400  |
| H | 8.42450200  | -1.95344400 | 2.52359800  |
| H | 9.15837900  | 1.58285000  | 0.18197400  |
| C | 4.13171200  | 4.91119600  | 0.11625600  |
| H | 3.34342900  | 3.89759300  | -1.62369800 |
| H | 5.00375700  | 5.53865900  | 1.99362100  |
| C | 7.39345500  | -4.09121900 | -1.73691900 |
| C | 10.36355100 | -0.71746900 | 1.04156400  |
| C | 3.94191200  | 6.28111400  | -0.41857000 |

|   |              |             |             |
|---|--------------|-------------|-------------|
| C | 8.72842300   | -3.71193500 | -1.96932500 |
| C | 7.02076900   | -5.41993400 | -2.03146700 |
| C | 10.62359500  | -2.07842300 | 0.79685200  |
| C | 11.44788200  | 0.18406300  | 0.99052100  |
| C | 4.88988200   | 7.29716400  | -0.17002000 |
| C | 2.81220100   | 6.60823800  | -1.19044900 |
| C | 9.65349600   | -4.62367000 | -2.47455500 |
| H | 9.05419800   | -2.70601200 | -1.72205700 |
| C | 7.94249400   | -6.32961400 | -2.53727400 |
| H | 5.99179700   | -5.73384400 | -1.87854200 |
| C | 11.91392700  | -2.52003200 | 0.50938400  |
| H | 9.80545300   | -2.79245700 | 0.79953100  |
| C | 12.73563300  | -0.25550600 | 0.70523400  |
| H | 11.27733900  | 1.23747400  | 1.19531700  |
| C | 4.71635000   | 8.58239700  | -0.67030300 |
| H | 5.78301700   | 7.06693300  | 0.40412700  |
| C | 2.63784900   | 7.89661000  | -1.69405300 |
| H | 2.05262200   | 5.85509000  | -1.37950100 |
| C | 9.27680500   | -5.94491400 | -2.76668500 |
| H | 10.68305700  | -4.30901900 | -2.63179700 |
| H | 7.63724100   | -7.34620700 | -2.76554000 |
| C | 12.98902400  | -1.61765300 | 0.45773200  |
| H | 12.08586300  | -3.57565900 | 0.30970900  |
| H | 13.56034800  | 0.45013000  | 0.67700300  |
| C | 3.58461000   | 8.90311900  | -1.44271200 |
| H | 5.46000600   | 9.34914300  | -0.47565100 |
| H | 1.75175100   | 8.12660000  | -2.28194000 |
| C | 10.28367400  | -6.87957700 | -3.29694700 |
| C | 14.33726800  | -2.12045100 | 0.14560200  |
| C | 3.36522700   | 10.25181400 | -1.99135300 |
| H | 11.28864900  | -6.45233500 | -3.41711600 |
| H | 14.39597500  | -3.20406600 | -0.02542100 |
| H | 2.43872500   | 10.36763300 | -2.57034000 |
| N | 4.18321400   | 11.22544700 | -1.81580500 |
| H | 3.83693600   | 12.06779300 | -2.28100500 |
| N | 15.37210800  | -1.36417000 | 0.07463800  |
| H | 16.20097200  | -1.91807900 | -0.15344100 |
| N | 10.02280300  | -8.09952000 | -3.59933600 |
| H | 10.86361400  | -8.56607400 | -3.94763100 |
| N | -14.88550600 | 0.82789900  | -5.03308700 |
| N | -15.71029100 | -2.65881500 | 4.10880600  |
| C | -15.36412200 | 2.00444500  | -5.16323700 |
| H | -15.32451100 | 2.77004300  | -4.37784700 |
| H | -15.83223900 | 2.28089200  | -6.10772500 |

|   |              |             |            |
|---|--------------|-------------|------------|
| C | -15.91144300 | -1.93206000 | 5.13923500 |
| H | -16.52184400 | -2.32708400 | 5.95099800 |
| H | -15.51261600 | -0.91645500 | 5.25772700 |
| C | 4.30247200   | 0.61099900  | 3.22826700 |
| O | 4.34003400   | 1.59457200  | 4.00571200 |
| O | 4.00829300   | -0.57601700 | 3.52266000 |

Sum of electronic and thermal Free Energies = -3424.206766 (Hartree/Particle).

**Table-S9.** DFT-optimized geometry of **model-b** (doublet), computed at the UB3LYP-D3/ 6-31+G\* level in acetonitrile solvent using PCM.

| Atom | x            | y           | z           |
|------|--------------|-------------|-------------|
| N    | -11.44977300 | -0.59903300 | -0.09899700 |
| C    | -12.35783700 | -0.75985900 | 0.97867100  |
| C    | -12.06647600 | -0.22733900 | 2.24574900  |
| C    | -13.55735900 | -1.47272500 | 0.80391300  |
| C    | -12.95510600 | -0.39028600 | 3.30634900  |
| H    | -11.13413200 | 0.30696500  | 2.40105300  |
| C    | -14.44160500 | -1.63790500 | 1.86562000  |
| H    | -13.78774000 | -1.90444600 | -0.16520600 |
| C    | -14.16693700 | -1.08126700 | 3.12593700  |
| H    | -12.69655300 | 0.00907200  | 4.28302300  |
| H    | -15.35975700 | -2.20247500 | 1.72759300  |
| C    | -11.93508600 | -0.32744000 | -1.40440600 |
| C    | -12.99244800 | 0.57610800  | -1.60166000 |
| C    | -11.37607700 | -0.97024400 | -2.52301800 |
| C    | -13.47070800 | 0.84085400  | -2.88317800 |
| H    | -13.44684500 | 1.06457200  | -0.74500300 |
| C    | -11.85809600 | -0.70801400 | -3.80191300 |
| H    | -10.56854600 | -1.68231300 | -2.38320200 |
| C    | -12.89558000 | 0.21720000  | -4.00512000 |
| H    | -14.30531700 | 1.52477700  | -3.00908800 |
| H    | -11.43178300 | -1.21903300 | -4.66092400 |
| C    | -10.05311900 | -0.72559800 | 0.12420900  |
| C    | -9.14838100  | 0.15737600  | -0.48780800 |
| C    | -9.54892300  | -1.74871600 | 0.94595800  |
| C    | -7.77754200  | 0.02988300  | -0.27661300 |

|   |              |             |             |
|---|--------------|-------------|-------------|
| H | -9.52275900  | 0.93854000  | -1.14271400 |
| C | -8.17947700  | -1.87478000 | 1.15612300  |
| H | -10.23606300 | -2.44800500 | 1.41270100  |
| C | -7.26921800  | -0.97681800 | 0.56845000  |
| H | -7.09787100  | 0.70740700  | -0.78561600 |
| H | -7.79513900  | -2.67486800 | 1.78303500  |
| N | -5.89871200  | -1.17339400 | 0.81728500  |
| C | -5.10503700  | -0.16456300 | 0.89534800  |
| C | -3.65871700  | -0.29472800 | 1.08514900  |
| H | -5.48178700  | 0.86662600  | 0.83738100  |
| C | -3.01654800  | -1.54638900 | 1.16419900  |
| C | -2.87410700  | 0.86775400  | 1.18884400  |
| C | -1.64014300  | -1.62573800 | 1.33859200  |
| H | -3.61202800  | -2.45138400 | 1.09238400  |
| C | -1.49477600  | 0.78538100  | 1.36377100  |
| H | -3.34698000  | 1.84491600  | 1.11674100  |
| C | -0.84763900  | -0.46222600 | 1.44011700  |
| H | -1.16883200  | -2.60186600 | 1.41390200  |
| H | -0.90993600  | 1.69921500  | 1.40785500  |
| C | 0.62494500   | -0.53838000 | 1.58420700  |
| C | 1.37658400   | -1.51004700 | 0.90535600  |
| C | 1.33165200   | 0.39560500  | 2.36387100  |
| C | 2.77240100   | -1.50540300 | 0.94965900  |
| H | 0.87431700   | -2.24587000 | 0.28246600  |
| C | 2.72197300   | 0.39094500  | 2.41251500  |
| H | 0.78713200   | 1.14274000  | 2.93568800  |
| C | 3.48045800   | -0.53669500 | 1.67566700  |
| H | 3.30656900   | -2.24067600 | 0.35861400  |
| H | 3.23577100   | 1.14749100  | 2.99388400  |
| C | 5.02400600   | -0.39114900 | 1.58052700  |
| C | 5.39689700   | 0.88398700  | 0.78925600  |
| C | 5.62110600   | -1.65008900 | 0.92250800  |
| C | 6.75856100   | 1.31105700  | 0.66525800  |
| C | 4.31460900   | 1.69106900  | 0.18424300  |
| C | 6.09649100   | -1.62624300 | -0.39797100 |
| C | 5.61727800   | -2.89713600 | 1.57338600  |
| C | 7.84354100   | 0.63887400  | 1.30488600  |
| C | 7.11938500   | 2.41387800  | -0.16631800 |
| C | 3.45394200   | 1.14635900  | -0.78725200 |
| C | 4.05054000   | 2.99990700  | 0.62751900  |
| C | 6.57942900   | -2.77407100 | -1.02879400 |
| H | 6.08862800   | -0.69752800 | -0.95862200 |
| C | 6.09761400   | -4.04647700 | 0.94840500  |
| H | 5.23896900   | -2.96011200 | 2.58474800  |

|   |             |             |             |
|---|-------------|-------------|-------------|
| C | 9.15662900  | 1.04632500  | 1.13994900  |
| H | 7.65037800  | -0.21144800 | 1.94734200  |
| C | 8.43577200  | 2.82075900  | -0.31988600 |
| H | 6.34712700  | 2.94042200  | -0.71637900 |
| C | 2.33889100  | 1.84594600  | -1.23738500 |
| H | 3.64771600  | 0.15001500  | -1.17136700 |
| C | 2.93276900  | 3.70198600  | 0.18017700  |
| H | 4.70112300  | 3.44382000  | 1.37542100  |
| C | 6.59793300  | -4.01181000 | -0.36639400 |
| H | 6.91957500  | -2.70474400 | -2.05883500 |
| H | 6.09844000  | -4.98271300 | 1.50095900  |
| C | 9.49719100  | 2.15217900  | 0.32850600  |
| H | 9.93714200  | 0.51265700  | 1.67570700  |
| H | 8.64966300  | 3.65198300  | -0.98655700 |
| C | 2.03531100  | 3.12616900  | -0.73833900 |
| H | 1.69196100  | 1.38992100  | -1.98207400 |
| H | 2.72593200  | 4.68607300  | 0.59264400  |
| C | 7.11483200  | -5.23326900 | -1.02945000 |
| C | 10.89950100 | 2.58218200  | 0.15929300  |
| C | 0.78708100  | 3.82079400  | -1.13296400 |
| C | 8.22014300  | -5.17448000 | -1.89775400 |
| C | 6.51226700  | -6.49095200 | -0.81031500 |
| C | 11.95737900 | 1.65117000  | 0.17974200  |
| C | 11.22788400 | 3.94478000  | -0.02834000 |
| C | 0.74899400  | 5.21930200  | -1.31708700 |
| C | -0.40741800 | 3.09807200  | -1.30861800 |
| C | 8.70234700  | -6.32418100 | -2.52189000 |
| H | 8.72081900  | -4.22580600 | -2.06887500 |
| C | 6.99318400  | -7.63812700 | -1.43074200 |
| H | 5.64299800  | -6.56247700 | -0.16254000 |
| C | 13.27888700 | 2.06278700  | 0.02143400  |
| H | 11.74343200 | 0.59269700  | 0.29480500  |
| C | 12.54546800 | 4.35519800  | -0.18676600 |
| H | 10.43935600 | 4.69181600  | -0.02215100 |
| C | -0.43184600 | 5.86685700  | -1.66222300 |
| H | 1.66136600  | 5.79886800  | -1.20598700 |
| C | -1.59210600 | 3.74664500  | -1.65244700 |
| H | -0.41828700 | 2.02514900  | -1.14222300 |
| C | 8.09881900  | -7.57260400 | -2.29884100 |
| H | 9.56343100  | -6.25354700 | -3.18309500 |
| H | 6.51200300  | -8.59575900 | -1.25674100 |
| C | 13.59657900 | 3.41885400  | -0.16461500 |
| H | 14.07467000 | 1.32088700  | 0.03225900  |
| H | 12.77637300 | 5.40790500  | -0.31865200 |

|   |              |              |             |
|---|--------------|--------------|-------------|
| C | -1.62403400  | 5.13894100   | -1.83487200 |
| H | -0.44237300  | 6.94267300   | -1.80781200 |
| H | -2.50517600  | 3.16629700   | -1.76772100 |
| C | 8.63715000   | -8.76487800  | -2.97480000 |
| C | 15.00422100  | 3.81439900   | -0.32709800 |
| C | -2.89511500  | 5.78929100   | -2.19517900 |
| H | 9.50379100   | -8.57471400  | -3.62273100 |
| H | 15.72306700  | 2.98459300   | -0.28450900 |
| H | -3.75046000  | 5.10636000   | -2.28995400 |
| N | -3.00985600  | 7.05343900   | -2.38643300 |
| H | -3.97555100  | 7.28971600   | -2.62620800 |
| N | 15.37945900  | 5.02980100   | -0.50481200 |
| H | 16.39726800  | 5.07725000   | -0.59215700 |
| N | 8.14274700   | -9.94045100  | -2.82826000 |
| H | 8.66732600   | -10.61816600 | -3.38625800 |
| N | -13.34201800 | 0.42992000   | -5.33155100 |
| N | -15.10672700 | -1.29617100  | 4.16256400  |
| C | -13.70014000 | 1.59709700   | -5.70527600 |
| H | -13.64196400 | 2.48740200   | -5.06606400 |
| H | -14.07682100 | 1.73296200   | -6.71880600 |
| C | -15.33020700 | -0.37951100  | 5.02285400  |
| H | -16.02901200 | -0.57881100  | 5.83498000  |
| H | -14.86575800 | 0.61437900   | 4.99082800  |
| C | 5.51656200   | -0.14836000  | 3.11035900  |
| O | 5.48287800   | 1.05059100   | 3.48957000  |
| O | 5.83948400   | -1.14846600  | 3.79493300  |

-----

Sum of electronic and thermal Free Energies = -3424.207059 (Hartree/Particle).

**Table-S10.** DFT-optimized geometry of **model-c** (doublet), computed at the UB3LYP-D3/ 6-31+G\* level in acetonitrile solvent using PCM.

| Atom | x            | y           | z           |
|------|--------------|-------------|-------------|
| N    | -11.54908400 | -0.79763100 | -0.33020000 |
| C    | -12.27870300 | -2.01113600 | -0.47982600 |
| C    | -12.07346600 | -3.07979900 | 0.40564200  |
| C    | -13.21057100 | -2.15241800 | -1.52101500 |
| C    | -12.79037000 | -4.26543400 | 0.25890700  |

|   |              |             |             |
|---|--------------|-------------|-------------|
| H | -11.34559800 | -2.98111800 | 1.20531300  |
| C | -13.92158200 | -3.33922000 | -1.67021600 |
| H | -13.36605100 | -1.33294800 | -2.21607300 |
| C | -13.73827400 | -4.40330100 | -0.77112000 |
| H | -12.60260200 | -5.09135500 | 0.93892000  |
| H | -14.63062700 | -3.45317000 | -2.48541900 |
| C | -12.24819700 | 0.43806100  | -0.43458400 |
| C | -13.48124000 | 0.61070600  | 0.21190700  |
| C | -11.72857100 | 1.48723600  | -1.21083000 |
| C | -14.17416800 | 1.81441600  | 0.10046800  |
| H | -13.89958200 | -0.20365700 | 0.79569100  |
| C | -12.42445600 | 2.68649000  | -1.32647000 |
| H | -10.78507000 | 1.35246800  | -1.73077700 |
| C | -13.64376800 | 2.87607500  | -0.65441700 |
| H | -15.13815200 | 1.92387400  | 0.58899600  |
| H | -12.02855400 | 3.49128400  | -1.93949500 |
| C | -10.16516400 | -0.81706300 | -0.10195200 |
| C | -9.54770500  | 0.18645400  | 0.68422100  |
| C | -9.35078900  | -1.84083800 | -0.64940200 |
| C | -8.18535400  | 0.18467100  | 0.90757700  |
| H | -10.16263500 | 0.96256700  | 1.12969700  |
| C | -7.99183000  | -1.85208200 | -0.42288300 |
| H | -9.80478500  | -2.61464300 | -1.26034500 |
| C | -7.33604200  | -0.83940200 | 0.35784700  |
| H | -7.76201200  | 0.95933500  | 1.53779300  |
| H | -7.37239400  | -2.63267900 | -0.85641500 |
| N | -6.00741600  | -0.93990300 | 0.50363200  |
| C | -5.31644300  | 0.09177400  | 1.24125700  |
| C | -3.81562300  | 0.01508300  | 1.01839400  |
| H | -5.65285400  | 1.09448600  | 0.94296900  |
| C | -3.16226900  | -1.20430200 | 0.78867200  |
| C | -3.03446600  | 1.17835200  | 1.08886500  |
| C | -1.77603500  | -1.25781600 | 0.63290600  |
| H | -3.75034000  | -2.11475300 | 0.73179000  |
| C | -1.64795900  | 1.12713900  | 0.94247000  |
| H | -3.51976700  | 2.13698200  | 1.25603200  |
| C | -0.98926500  | -0.09424500 | 0.70954900  |
| H | -1.29583400  | -2.22009100 | 0.47199900  |
| H | -1.07316800  | 2.04929500  | 0.98004900  |
| C | 0.48380800   | -0.14712600 | 0.54144500  |
| C | 1.07896900   | -0.98347100 | -0.42119000 |
| C | 1.33538800   | 0.63672500  | 1.34294700  |
| C | 2.46264700   | -1.02277300 | -0.58441100 |
| H | 0.45024100   | -1.59230800 | -1.06565200 |

|   |             |             |             |
|---|-------------|-------------|-------------|
| C | 2.71709200  | 0.60168400  | 1.17439800  |
| H | 0.91111200  | 1.26373100  | 2.12280100  |
| C | 3.30957600  | -0.21456900 | 0.19433000  |
| H | 2.89305000  | -1.67238200 | -1.34210800 |
| H | 3.35001500  | 1.21213500  | 1.81166400  |
| C | 4.78583700  | -0.25157800 | 0.00283000  |
| C | 5.55025800  | 0.88140900  | -0.05231300 |
| C | 5.38094500  | -1.61116300 | -0.13088800 |
| C | 7.03704800  | 0.84101700  | 0.03329700  |
| C | 4.95688100  | 2.23996500  | -0.19783000 |
| C | 6.26619200  | -1.91775100 | -1.17890200 |
| C | 5.04587200  | -2.63787000 | 0.76851500  |
| C | 7.69055800  | 0.10325700  | 1.03595200  |
| C | 7.83106300  | 1.57051900  | -0.86857700 |
| C | 3.98216600  | 2.51131600  | -1.17396300 |
| C | 5.37968500  | 3.30085700  | 0.62161100  |
| C | 6.81849900  | -3.18944500 | -1.30517200 |
| H | 6.51761900  | -1.14900300 | -1.90363800 |
| C | 5.60559000  | -3.90831100 | 0.65044300  |
| H | 4.35556800  | -2.43044400 | 1.58191300  |
| C | 9.08013400  | 0.06915500  | 1.11412600  |
| H | 7.09893900  | -0.44469400 | 1.76327300  |
| C | 9.22197300  | 1.53052500  | -0.79794000 |
| H | 7.35186500  | 2.15751700  | -1.64768700 |
| C | 3.42719800  | 3.78159400  | -1.30236600 |
| H | 3.65920300  | 1.71471900  | -1.83772000 |
| C | 4.81885000  | 4.57053800  | 0.50125900  |
| H | 6.13922600  | 3.12134800  | 1.37795900  |
| C | 6.50799200  | -4.21026900 | -0.38691600 |
| H | 7.47902900  | -3.39893400 | -2.14210600 |
| H | 5.35647800  | -4.66700600 | 1.38728600  |
| C | 9.87688100  | 0.77439100  | 0.19240900  |
| H | 9.55152900  | -0.49146300 | 1.91674900  |
| H | 9.80523200  | 2.07355000  | -1.53662500 |
| C | 3.82523400  | 4.83669100  | -0.45938800 |
| H | 2.69220900  | 3.96186900  | -2.08215000 |
| H | 5.13821300  | 5.35675700  | 1.17987300  |
| C | 7.10797900  | -5.56027000 | -0.51447800 |
| C | 11.35692700 | 0.72601600  | 0.26759500  |
| C | 3.21796000  | 6.18394300  | -0.58033800 |
| C | 8.43759600  | -5.72299500 | -0.94412600 |
| C | 6.36306100  | -6.71969100 | -0.20979900 |
| C | 12.02474500 | -0.45862000 | 0.62744600  |
| C | 12.13745000 | 1.86620300  | -0.01994200 |



|   |              |              |             |
|---|--------------|--------------|-------------|
| C | 3.99128900   | 7.35003200   | -0.39544500 |
| C | 1.85163700   | 6.33699300   | -0.87781400 |
| C | 8.99882300   | -6.99318300  | -1.06731100 |
| H | 9.04500800   | -4.84931800  | -1.16251900 |
| C | 6.92237500   | -7.98648800  | -0.33139700 |
| H | 5.32685100   | -6.62473900  | 0.10249900  |
| C | 13.41643900  | -0.50121500  | 0.69855500  |
| H | 11.45343600  | -1.35980800  | 0.83111800  |
| C | 13.52513500  | 1.82425300   | 0.04998200  |
| H | 11.64671800  | 2.80056600   | -0.27765500 |
| C | 3.42310000   | 8.61411900   | -0.50258600 |
| H | 5.05397800   | 7.26125300   | -0.18769400 |
| C | 1.28121800   | 7.60454700   | -0.98583100 |
| H | 1.22464900   | 5.45864400   | -1.00149200 |
| C | 8.25194100   | -8.14329500  | -0.76432000 |
| H | 10.03145700  | -7.09283700  | -1.39477500 |
| H | 6.33246800   | -8.86839000  | -0.10132200 |
| C | 14.18776000  | 0.63682800   | 0.41156500  |
| H | 13.91037200  | -1.43131100  | 0.97147100  |
| H | 14.10990100  | 2.71319300   | -0.16567800 |
| C | 2.05570800   | 8.76121700   | -0.79966400 |
| H | 4.03363900   | 9.50126200   | -0.36538600 |
| H | 0.22017400   | 7.69712900   | -1.20750900 |
| C | 8.87813800   | -9.46868100  | -0.90904600 |
| C | 15.65584000  | 0.55330400   | 0.49782200  |
| C | 1.41777100   | 10.08347300  | -0.91892400 |
| H | 9.92262800   | -9.44992600  | -1.24888700 |
| H | 16.04463100  | -0.43190800  | 0.78925900  |
| H | 0.34396600   | 10.05760700  | -1.14916400 |
| N | 2.05495600   | 11.18729300  | -0.76775500 |
| H | 1.42309300   | 11.98176100  | -0.89246800 |
| N | 16.43174600  | 1.54632300   | 0.25490200  |
| H | 17.40927400  | 1.27052600   | 0.37441400  |
| N | 8.26251800   | -10.56738700 | -0.66208300 |
| H | 8.88011000   | -11.36555800 | -0.82770600 |
| N | -14.30712700 | 4.11475300   | -0.82186100 |
| N | -14.48409100 | -5.58680500  | -0.98466600 |
| C | -14.90634000 | 4.65291600   | 0.16843800  |
| H | -14.90435100 | 4.23358900   | 1.18266300  |
| H | -15.44500100 | 5.58745900   | 0.01362800  |
| C | -14.94951300 | -6.23331100  | 0.01270100  |
| H | -15.48798700 | -7.16340800  | -0.16747300 |
| H | -14.84949100 | -5.90180400  | 1.05412800  |
| C | -5.56738600  | 0.02287400   | 2.82077400  |

|   |             |             |            |
|---|-------------|-------------|------------|
| O | -5.51515000 | 1.13478900  | 3.41095900 |
| O | -5.76455100 | -1.11026900 | 3.32542200 |

Sum of electronic and thermal Free Energies = -3424.218842 (Hartree/Particle).

**Table-S11.** DFT-optimized geometry of TS (doublet), computed at the UB3LYP-D3/ 6-31+G\* level in acetonitrile solvent using PCM.

| Atom | x           | y           | z           |
|------|-------------|-------------|-------------|
| N    | 11.71334000 | -0.63381900 | 0.08741300  |
| C    | 12.54517400 | -0.95854200 | -1.00673000 |
| C    | 12.10657900 | -0.73572300 | -2.32572000 |
| C    | 13.80674900 | -1.55507300 | -0.81329500 |
| C    | 12.91110300 | -1.07093600 | -3.41195400 |
| H    | 11.12329800 | -0.30872200 | -2.49610900 |
| C    | 14.60395100 | -1.89556700 | -1.90127100 |
| H    | 14.15380500 | -1.76237500 | 0.19403500  |
| C    | 14.18411000 | -1.63746700 | -3.21718700 |
| H    | 12.53517300 | -0.90825000 | -4.41823600 |
| H    | 15.56923000 | -2.36856600 | -1.74084100 |
| C    | 12.24373200 | -0.17068100 | 1.31264100  |
| C    | 13.35811000 | 0.68885500  | 1.34701600  |
| C    | 11.65553300 | -0.55364700 | 2.53320400  |
| C    | 13.86358600 | 1.15323000  | 2.55852600  |
| H    | 13.83432600 | 0.98753300  | 0.41833200  |
| C    | 12.16862900 | -0.09420200 | 3.74236100  |
| H    | 10.79883300 | -1.22008000 | 2.52642700  |
| C    | 13.26519800 | 0.78323100  | 3.77727900  |
| H    | 14.73942100 | 1.79613000  | 2.55455300  |
| H    | 11.71707800 | -0.40906400 | 4.67948000  |
| C    | 10.29738800 | -0.79660000 | -0.03935400 |
| C    | 9.42603400  | 0.26473100  | 0.23899300  |
| C    | 9.74918400  | -2.02832900 | -0.43231300 |
| C    | 8.04721800  | 0.10672100  | 0.12689500  |
| H    | 9.83585200  | 1.21703300  | 0.56737700  |
| C    | 8.37516900  | -2.18776400 | -0.56559200 |
| H    | 10.41362600 | -2.86230500 | -0.64436100 |
| C    | 7.47201000  | -1.12336400 | -0.30128200 |

|   |             |             |             |
|---|-------------|-------------|-------------|
| H | 7.40003300  | 0.93662500  | 0.39379100  |
| H | 7.98510300  | -3.15252300 | -0.87292900 |
| N | 6.10893100  | -1.31799800 | -0.43137600 |
| C | 5.30420700  | -0.27167700 | -0.67556700 |
| C | 3.88925300  | -0.29730200 | -0.54747100 |
| H | 5.74301800  | 0.66409600  | -1.04027700 |
| C | 3.16778400  | -1.37282000 | 0.05808700  |
| C | 3.10384900  | 0.79688500  | -1.02414800 |
| C | 1.78628800  | -1.35592500 | 0.14976000  |
| H | 3.71635300  | -2.21483300 | 0.46823900  |
| C | 1.72456300  | 0.80252200  | -0.93031600 |
| H | 3.61062400  | 1.65117400  | -1.47077100 |
| C | 1.00734400  | -0.27744800 | -0.34427800 |
| H | 1.29044000  | -2.21197700 | 0.60068500  |
| H | 1.18362500  | 1.67401600  | -1.29002400 |
| C | -0.45822900 | -0.26830900 | -0.24780000 |
| C | -1.14809400 | -1.00553800 | 0.74484400  |
| C | -1.25778200 | 0.47631700  | -1.14956200 |
| C | -2.53603800 | -0.99135200 | 0.83323100  |
| H | -0.58795200 | -1.57824300 | 1.47841600  |
| C | -2.64313600 | 0.50232100  | -1.04754600 |
| H | -0.78769100 | 1.01950900  | -1.96437900 |
| C | -3.32148100 | -0.21862100 | -0.04484900 |
| H | -3.02343700 | -1.56667500 | 1.61658800  |
| H | -3.21872400 | 1.08113800  | -1.76443000 |
| C | -4.79984100 | -0.18948200 | 0.06998400  |
| C | -5.52761200 | 0.96907000  | -0.03094600 |
| C | -5.45617900 | -1.50673300 | 0.30464700  |
| C | -7.00351400 | 0.96417900  | -0.22405600 |
| C | -4.89709500 | 2.31509500  | 0.04888900  |
| C | -6.42116300 | -1.67140200 | 1.31388300  |
| C | -5.10595400 | -2.63427100 | -0.45818800 |
| C | -7.61170500 | 0.14600000  | -1.19332800 |
| C | -7.83576600 | 1.80292700  | 0.53889800  |
| C | -3.97068700 | 2.62877000  | 1.06015300  |
| C | -5.23766300 | 3.32963200  | -0.86335900 |
| C | -7.03423000 | -2.90245100 | 1.53045800  |
| H | -6.68791000 | -0.82231300 | 1.93630900  |
| C | -5.72468900 | -3.86515300 | -0.25007100 |
| H | -4.35566900 | -2.53697100 | -1.23831400 |
| C | -8.99258600 | 0.14071500  | -1.36913200 |
| H | -6.98965900 | -0.48861500 | -1.81758000 |
| C | -9.21851000 | 1.79372900  | 0.37034000  |
| H | -7.39350200 | 2.45260500  | 1.28957900  |

|   |              |             |             |
|---|--------------|-------------|-------------|
| C | -3.38693000  | 3.88962800  | 1.13706700  |
| H | -3.71061000  | 1.87151700  | 1.79382800  |
| C | -4.64823500  | 4.59025800  | -0.79357000 |
| H | -5.95670600  | 3.11938600  | -1.65076400 |
| C | -6.70654900  | -4.02461700 | 0.74597500  |
| H | -7.75767100  | -2.99964400 | 2.33544600  |
| H | -5.45927200  | -4.70544000 | -0.88590000 |
| C | -9.82861900  | 0.95771700  | -0.58421700 |
| H | -9.42452100  | -0.48636200 | -2.14438400 |
| H | -9.83300400  | 2.42475600  | 1.00672400  |
| C | -3.70506700  | 4.89684800  | 0.20520800  |
| H | -2.69431900  | 4.10310700  | 1.94670400  |
| H | -4.90495800  | 5.33603200  | -1.54105300 |
| C | -7.37056900  | -5.33178200 | 0.96685200  |
| C | -11.30021000 | 0.94092500  | -0.76171900 |
| C | -3.06920100  | 6.23387400  | 0.27640000  |
| C | -8.73271100  | -5.40243600 | 1.31124800  |
| C | -6.65582800  | -6.54194900 | 0.83753400  |
| C | -11.97981400 | -0.25379500 | -1.06242000 |
| C | -12.06268100 | 2.12197700  | -0.63324200 |
| C | -3.79317300  | 7.40292100  | -0.04328300 |
| C | -1.72359400  | 6.37595900  | 0.66234100  |
| C | -9.35444100  | -6.63263500 | 1.52030600  |
| H | -9.31630000  | -4.49001100 | 1.39425200  |
| C | -7.27533700  | -7.76893900 | 1.04482100  |
| H | -5.59714300  | -6.51581000 | 0.59512400  |
| C | -13.36366200 | -0.26679200 | -1.23023500 |
| H | -11.42558800 | -1.18452600 | -1.14320900 |
| C | -13.44270100 | 2.10953300  | -0.79906100 |
| H | -11.56192100 | 3.06320700  | -0.42445200 |
| C | -3.19828800  | 8.65758100  | 0.01905000  |
| H | -4.84059100  | 7.32559900  | -0.32119000 |
| C | -1.12666300  | 7.63413300  | 0.72620800  |
| H | -1.13176100  | 5.49435000  | 0.89120600  |
| C | -8.63761300  | -7.83341500 | 1.39103600  |
| H | -10.41096100 | -6.66170800 | 1.77805000  |
| H | -6.70849100  | -8.69001400 | 0.95009300  |
| C | -14.11661900 | 0.91186100  | -1.10161800 |
| H | -13.86678600 | -1.20479800 | -1.45495800 |
| H | -14.01196100 | 3.02922500  | -0.70507400 |
| C | -1.85206700  | 8.79326600  | 0.40551100  |
| H | -3.77212800  | 9.54698200  | -0.22249400 |
| H | -0.08219700  | 7.71679800  | 1.01907600  |
| C | -9.32802300  | -9.11402100 | 1.62091300  |

|   |              |              |             |
|---|--------------|--------------|-------------|
| C | -15.57673700 | 0.85858100   | -1.28671700 |
| C | -1.18702400  | 10.10495500  | 0.48177200  |
| H | -10.39042300 | -9.02357400  | 1.88556400  |
| H | -15.97578200 | -0.13901800  | -1.51566300 |
| H | -0.13422200  | 10.07012600  | 0.79360300  |
| N | -1.77922500  | 11.21041200  | 0.20788000  |
| H | -1.13552700  | 11.99638600  | 0.32538500  |
| N | -16.33574200 | 1.88932200   | -1.19192100 |
| H | -17.31065900 | 1.62827000   | -1.35690300 |
| N | -8.74557200  | -10.25357200 | 1.52378100  |
| H | -9.40615700  | -11.00822400 | 1.72381400  |
| N | 13.73270800  | 1.20449600   | 5.04529200  |
| N | 15.05027700  | -2.01544500  | -4.27094400 |
| C | 14.21902800  | 2.37599900   | 5.19639300  |
| H | 14.26308900  | 3.12815500   | 4.39837400  |
| H | 14.60660400  | 2.66258000   | 6.17380900  |
| C | 15.09559500  | -1.32748900  | -5.34643100 |
| H | 15.74317300  | -1.66083700  | -6.15711200 |
| H | 14.52552200  | -0.40347200  | -5.50682700 |
| C | 5.43617800   | -3.25821000  | -1.18831000 |
| O | 5.10361300   | -2.97634800  | -2.29462900 |
| O | 5.61233000   | -3.99441200  | -0.26949800 |

Sum of electronic and thermal Free Energies = -3424.209184 (Hartree/Particle).

**Table-S12.** DFT-optimized geometry of [TPA-TPE-CO<sub>2</sub>]<sup>2-</sup> (singlet), computed at the B3LYP-D3/ 6-31+G\* level in acetonitrile solvent using PCM.

| Atom | x            | y           | z           |
|------|--------------|-------------|-------------|
| N    | -10.26024000 | -0.51541700 | -0.75681400 |
| C    | -11.49317600 | -0.32156500 | -0.09570200 |
| C    | -11.53358700 | -0.14909400 | 1.30068800  |
| C    | -12.71135100 | -0.34159600 | -0.80279400 |
| C    | -12.74581700 | 0.02479500  | 1.96384100  |
| H    | -10.60794900 | -0.16500700 | 1.86740500  |
| C    | -13.92077100 | -0.17544100 | -0.13565600 |
| H    | -12.70611600 | -0.50114000 | -1.87642500 |
| C    | -13.95978700 | 0.03656100  | 1.25277600  |

|   |              |             |             |
|---|--------------|-------------|-------------|
| H | -12.74636500 | 0.13194800  | 3.04499400  |
| H | -14.85570100 | -0.20766000 | -0.68892800 |
| C | -10.02652100 | -0.01037600 | -2.05570400 |
| C | -10.54696700 | 1.23362600  | -2.45941400 |
| C | -9.25299600  | -0.74317100 | -2.97604700 |
| C | -10.29828300 | 1.73040700  | -3.73633000 |
| H | -11.15568600 | 1.81008500  | -1.76979100 |
| C | -9.01347500  | -0.24735100 | -4.25405900 |
| H | -8.84808900  | -1.70710100 | -2.68469200 |
| C | -9.51112600  | 1.00523900  | -4.64986000 |
| H | -10.73284900 | 2.68265100  | -4.02753700 |
| H | -8.42821300  | -0.82859100 | -4.96174500 |
| C | -9.22403400  | -1.25579100 | -0.10287900 |
| C | -7.94498700  | -0.70630400 | 0.05522400  |
| C | -9.46915300  | -2.54297000 | 0.39526000  |
| C | -6.93489300  | -1.43083500 | 0.68510400  |
| H | -7.73984600  | 0.28927100  | -0.33028500 |
| C | -8.46664400  | -3.26174700 | 1.04209400  |
| H | -10.46169900 | -2.97397000 | 0.28968400  |
| C | -7.16821900  | -2.72704900 | 1.19212200  |
| H | -5.94841400  | -0.99366300 | 0.80172900  |
| H | -8.67730400  | -4.25427400 | 1.42192700  |
| N | -6.14400600  | -3.40686000 | 1.88420400  |
| C | -5.28517500  | -2.61179800 | 2.70130400  |
| C | -3.97098400  | -2.33837500 | 2.38599300  |
| H | -5.74541200  | -2.16569300 | 3.58450700  |
| C | -3.31169700  | -2.81958800 | 1.18804800  |
| C | -3.13146500  | -1.52516300 | 3.24453700  |
| C | -2.00045300  | -2.51352900 | 0.89986500  |
| H | -3.88450400  | -3.42838800 | 0.49232800  |
| C | -1.82811000  | -1.22269000 | 2.92978700  |
| H | -3.55707900  | -1.14596100 | 4.17357700  |
| C | -1.18088900  | -1.69807700 | 1.74234400  |
| H | -1.59174200  | -2.89480800 | -0.03331200 |
| H | -1.26924000  | -0.61466400 | 3.63732200  |
| C | 0.19230200   | -1.36842200 | 1.41559800  |
| C | 0.92161600   | -2.03713500 | 0.38594900  |
| C | 0.92304100   | -0.35252900 | 2.10507000  |
| C | 2.23261800   | -1.71136900 | 0.07237800  |
| H | 0.45392900   | -2.84637500 | -0.16681000 |
| C | 2.22705700   | -0.02202800 | 1.77616900  |
| H | 0.44942800   | 0.19997500  | 2.91096100  |
| C | 2.93083100   | -0.67624900 | 0.73788300  |
| H | 2.73339200   | -2.26261100 | -0.72061800 |

|   |             |             |             |
|---|-------------|-------------|-------------|
| H | 2.72495300  | 0.76643100  | 2.33440100  |
| C | 4.30724200  | -0.31063900 | 0.37110400  |
| C | 4.76720800  | 0.99251000  | 0.35409500  |
| C | 5.20925300  | -1.43883100 | -0.00073900 |
| C | 6.21718000  | 1.31388600  | 0.35002200  |
| C | 3.84641500  | 2.15812700  | 0.32717900  |
| C | 5.99475500  | -1.38911700 | -1.16600600 |
| C | 5.28524000  | -2.59901500 | 0.78935400  |
| C | 7.12097600  | 0.65175700  | 1.20445400  |
| C | 6.74233300  | 2.30954600  | -0.49715100 |
| C | 2.72531500  | 2.18628100  | -0.52608500 |
| C | 4.08231000  | 3.29681500  | 1.12094400  |
| C | 6.84271700  | -2.43823900 | -1.51091000 |
| H | 5.93374000  | -0.51457900 | -1.80736500 |
| C | 6.13884400  | -3.64729400 | 0.45233900  |
| H | 4.68278500  | -2.66595200 | 1.69125900  |
| C | 8.48188100  | 0.94157400  | 1.18670900  |
| H | 6.74385300  | -0.09687700 | 1.89482900  |
| C | 8.10391900  | 2.59969900  | -0.51912300 |
| H | 6.07352500  | 2.84460300  | -1.16618600 |
| C | 1.87020300  | 3.28197400  | -0.56316200 |
| H | 2.52922500  | 1.33215700  | -1.16749300 |
| C | 3.22446100  | 4.39449800  | 1.08939500  |
| H | 4.94004000  | 3.31120000  | 1.78832300  |
| C | 6.94104100  | -3.58720300 | -0.70302000 |
| H | 7.41653900  | -2.37584000 | -2.43174500 |
| H | 6.20277900  | -4.51074500 | 1.10913500  |
| C | 9.00867000  | 1.91716600  | 0.31777300  |
| H | 9.14046300  | 0.42430900  | 1.87947500  |
| H | 8.47300100  | 3.34542800  | -1.21826600 |
| C | 2.09404300  | 4.41140700  | 0.25084900  |
| H | 1.03182900  | 3.27391200  | -1.25471100 |
| H | 3.42072600  | 5.23638900  | 1.74814300  |
| C | 7.85713000  | -4.69711600 | -1.05915900 |
| C | 10.45909300 | 2.21572600  | 0.28944000  |
| C | 1.17285600  | 5.57054200  | 0.22291800  |
| C | 9.11433900  | -4.44148400 | -1.63665200 |
| C | 7.49603700  | -6.04187400 | -0.82727700 |
| C | 11.41313200 | 1.19885000  | 0.48343000  |
| C | 10.93035700 | 3.52832600  | 0.06582300  |
| C | 1.65340900  | 6.88963700  | 0.37895000  |
| C | -0.21180700 | 5.39267500  | 0.04098600  |
| C | 9.97485100  | -5.48680700 | -1.96885500 |
| H | 9.43167600  | -3.41648200 | -1.80595600 |

|   |              |             |             |
|---|--------------|-------------|-------------|
| C | 8.35395800   | -7.08465000 | -1.15713100 |
| H | 6.52130300   | -6.26966700 | -0.40502700 |
| C | 12.77758100  | 1.48206100  | 0.45778500  |
| H | 11.08633100  | 0.17368400  | 0.63229600  |
| C | 12.29078900  | 3.81109900  | 0.03762100  |
| H | 10.21819200  | 4.33856400  | -0.06286800 |
| C | 0.79085200   | 7.97901400  | 0.35465700  |
| H | 2.71980500   | 7.06071000  | 0.49654400  |
| C | -1.07721800  | 6.48487900  | 0.01478900  |
| H | -0.61882000  | 4.39034600  | -0.05608100 |
| C | 9.61035500   | -6.82279000 | -1.73413300 |
| H | 10.94528100  | -5.26296500 | -2.40679800 |
| H | 8.05581000   | -8.11337900 | -0.97979600 |
| C | 13.23913900  | 2.78984100  | 0.23399700  |
| H | 13.49414900  | 0.67637500  | 0.60312600  |
| H | 12.63379400  | 4.82809000  | -0.12700800 |
| C | -0.59241100  | 7.79406000  | 0.17132300  |
| H | 1.18034400   | 8.98622600  | 0.46730000  |
| H | -2.14410400  | 6.31903100  | -0.11886100 |
| C | 10.54747900  | -7.89970200 | -2.09597800 |
| C | 14.68774200  | 3.04964200  | 0.21197200  |
| C | -1.53776500  | 8.92160300  | 0.13940300  |
| H | 11.49220700  | -7.55742500 | -2.54014800 |
| H | 15.31673300  | 2.16449000  | 0.37860000  |
| H | -2.58871300  | 8.63678900  | -0.00739100 |
| N | -1.17804200  | 10.14729600 | 0.27116900  |
| H | -1.99249600  | 10.76348100 | 0.21774600  |
| N | 15.19164000  | 4.21408500  | 0.01514700  |
| H | 16.21289400  | 4.16731000  | 0.04077400  |
| N | 10.29408700  | -9.14459600 | -1.91257600 |
| H | 11.07815900  | -9.71719800 | -2.23391300 |
| N | -9.22895900  | 1.44140700  | -5.96680500 |
| N | -15.22889500 | 0.19594100  | 1.85911300  |
| C | -9.04975800  | 2.68253400  | -6.20969200 |
| H | -9.05294800  | 3.46377400  | -5.43885500 |
| H | -8.87089800  | 2.99691000  | -7.23773800 |
| C | -15.36798500 | 0.96358500  | 2.87068300  |
| H | -16.34764600 | 1.04031000  | 3.34193100  |
| H | -14.55715500 | 1.56833100  | 3.29653500  |
| C | -5.98467200  | -4.84245000 | 1.79827500  |
| O | -5.25089000  | -5.38096300 | 2.67324400  |
| O | -6.57627700  | -5.42775000 | 0.84409800  |

---



Sum of electronic and thermal Free Energies = -3424.329812 (Hartree/Particle).

**Table-S13.** DFT-optimized geometry of [TPA-TPE-COOH] (doublet), computed at the UB3LYP-D3/ 6-31+G\* level in acetonitrile solvent using PCM. The spin density plot is also shown below. (Isovalue = 0.0004)

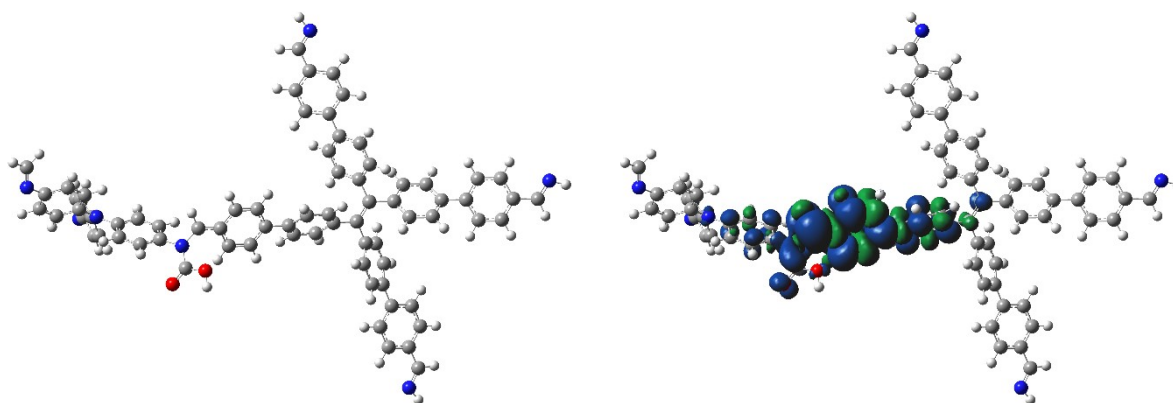

Spin Density Distribution

| Atom | x           | y           | z           |
|------|-------------|-------------|-------------|
| N    | 10.82356600 | -0.81991500 | 0.58360400  |
| C    | 11.99454700 | -0.26082900 | 0.00569800  |
| C    | 11.90839000 | 0.83341500  | -0.86997500 |
| C    | 13.25892800 | -0.80422500 | 0.29091500  |
| C    | 13.05742300 | 1.37867200  | -1.43919000 |
| H    | 10.93567300 | 1.25041700  | -1.11289000 |
| C    | 14.40541100 | -0.26072100 | -0.28092000 |
| H    | 13.33676600 | -1.65934400 | 0.95535300  |
| C    | 14.32546400 | 0.85116300  | -1.13590500 |
| H    | 12.96554400 | 2.20865700  | -2.13398700 |
| H    | 15.37910900 | -0.69370200 | -0.06858100 |
| C    | 10.82561300 | -1.19573500 | 1.95343000  |
| C    | 11.42820000 | -0.37227600 | 2.91790500  |
| C    | 10.24501200 | -2.40845200 | 2.36327300  |
| C    | 11.43886600 | -0.74331500 | 4.26103200  |
| H    | 11.89898000 | 0.55675500  | 2.61087600  |
| C    | 10.25955700 | -2.77935100 | 3.70449100  |
| H    | 9.79107100  | -3.06191900 | 1.62456600  |
| C    | 10.83546200 | -1.94392100 | 4.67614600  |
| H    | 11.93228300 | -0.10326200 | 4.98693100  |

|   |             |             |             |
|---|-------------|-------------|-------------|
| H | 9.82193400  | -3.72447400 | 4.01412000  |
| C | 9.66162200  | -1.01065700 | -0.20310400 |
| C | 8.38592000  | -0.76760600 | 0.33398800  |
| C | 9.76345300  | -1.44645500 | -1.53720100 |
| C | 7.24455300  | -0.96952800 | -0.43820000 |
| H | 8.28939700  | -0.42805900 | 1.36024100  |
| C | 8.62386200  | -1.62213600 | -2.31592400 |
| H | 10.74207000 | -1.63732000 | -1.96590300 |
| C | 7.35593700  | -1.39620100 | -1.76641700 |
| H | 6.26188200  | -0.78375500 | -0.01453500 |
| H | 8.71691100  | -1.95420700 | -3.34454000 |
| N | 6.16260400  | -1.53322900 | -2.55418900 |
| C | 5.30329500  | -0.41116000 | -2.58946500 |
| C | 3.92873000  | -0.43790600 | -2.27025900 |
| H | 5.80463900  | 0.53374800  | -2.77773100 |
| C | 3.25089000  | -1.59259200 | -1.78212800 |
| C | 3.15958700  | 0.75545600  | -2.40969200 |
| C | 1.90319200  | -1.54930500 | -1.46662500 |
| H | 3.79806500  | -2.51991000 | -1.64632200 |
| C | 1.81174500  | 0.78310400  | -2.09698900 |
| H | 3.64868900  | 1.66050000  | -2.76232700 |
| C | 1.14034000  | -0.36772500 | -1.61930600 |
| H | 1.42087300  | -2.45622000 | -1.11283200 |
| H | 1.26910700  | 1.71906500  | -2.19584400 |
| C | -0.29808400 | -0.32999200 | -1.28409700 |
| C | -0.83151300 | -1.12202600 | -0.24653400 |
| C | -1.19160100 | 0.49935500  | -1.99317900 |
| C | -2.18649900 | -1.07787600 | 0.07139500  |
| H | -0.17521700 | -1.76034700 | 0.33824400  |
| C | -2.54271000 | 0.55143700  | -1.66479500 |
| H | -0.83101700 | 1.09161300  | -2.82951600 |
| C | -3.06710200 | -0.22318700 | -0.61486500 |
| H | -2.56544000 | -1.69560100 | 0.88146800  |
| H | -3.20732600 | 1.19701700  | -2.23143600 |
| C | -4.51161500 | -0.16783200 | -0.25922200 |
| C | -5.17607100 | 1.01558000  | -0.08940900 |
| C | -5.18305700 | -1.48800600 | -0.10174800 |
| C | -6.66119700 | 1.09205900  | -0.00684700 |
| C | -4.46202300 | 2.31771700  | 0.02802200  |
| C | -5.98947200 | -1.76945200 | 1.01499200  |
| C | -5.00102800 | -2.50548200 | -1.05437500 |
| C | -7.48030600 | 0.43485100  | -0.94172600 |
| C | -7.28763400 | 1.85589900  | 0.99330900  |
| C | -3.37080700 | 2.47522100  | 0.90046200  |

|   |              |             |             |
|---|--------------|-------------|-------------|
| C | -4.88364700  | 3.43960200  | -0.70642700 |
| C | -6.61538900  | -3.00486100 | 1.15712400  |
| H | -6.12160000  | -1.01001600 | 1.77992900  |
| C | -5.63403600  | -3.73917700 | -0.91898600 |
| H | -4.37443100  | -2.31808200 | -1.92233900 |
| C | -8.86810500  | 0.51144900  | -0.86159700 |
| H | -7.02012500  | -0.13768000 | -1.74157800 |
| C | -8.67623500  | 1.92653800  | 1.08077300  |
| H | -6.67845500  | 2.38210400  | 1.72347100  |
| C | -2.70849500  | 3.69471900  | 1.01108600  |
| H | -3.04428100  | 1.63098000  | 1.50044900  |
| C | -4.21625300  | 4.65836700  | -0.60459400 |
| H | -5.73067200  | 3.34841000  | -1.38125700 |
| C | -6.45952100  | -4.01365400 | 0.18754000  |
| H | -7.21235100  | -3.19698400 | 2.04452200  |
| H | -5.50472200  | -4.48853500 | -1.69510900 |
| C | -9.49686100  | 1.25165000  | 0.15760300  |
| H | -9.47022000  | 0.01132600  | -1.61533800 |
| H | -9.12752900  | 2.49286700  | 1.89083200  |
| C | -3.11087600  | 4.81095000  | 0.25336100  |
| H | -1.88486800  | 3.78783600  | 1.71373000  |
| H | -4.54335000  | 5.49396200  | -1.21731300 |
| C | -7.13955300  | -5.32349400 | 0.33037200  |
| C | -10.97491800 | 1.32206000  | 0.25169900  |
| C | -2.39643300  | 6.10575200  | 0.36107400  |
| C | -8.43763200  | -5.41005700 | 0.86531200  |
| C | -6.50529400  | -6.51955000 | -0.06833200 |
| C | -11.77323200 | 0.20343600  | -0.04833300 |
| C | -11.62227300 | 2.51241000  | 0.64655800  |
| C | -3.09679500  | 7.32977400  | 0.30415100  |
| C | -0.99974700  | 6.15014000  | 0.52235500  |
| C | -9.07569100  | -6.64264200 | 0.99697100  |
| H | -8.96170200  | -4.50505700 | 1.15907400  |
| C | -7.14106700  | -7.74876500 | 0.06221500  |
| H | -5.49371900  | -6.48425900 | -0.46299800 |
| C | -13.16283000 | 0.27211900  | 0.04187300  |
| H | -11.30363600 | -0.73414800 | -0.33184400 |
| C | -13.00763100 | 2.58141900  | 0.73714500  |
| H | -11.03116200 | 3.39831700  | 0.86130900  |
| C | -2.43000000  | 8.54523500  | 0.40561100  |
| H | -4.17850300  | 7.32430500  | 0.20317300  |
| C | -0.33043700  | 7.36882800  | 0.62469000  |
| H | -0.42930100  | 5.22600400  | 0.54494600  |
| C | -8.43954000  | -7.82951100 | 0.59812400  |

|   |              |              |             |
|---|--------------|--------------|-------------|
| H | -10.08300900 | -6.68316600  | 1.40579000  |
| H | -6.63520000  | -8.66008400  | -0.24139400 |
| C | -13.80128500 | 1.45939400   | 0.43575400  |
| H | -13.75853200 | -0.60892600  | -0.18708400 |
| H | -13.49028900 | 3.50759600   | 1.03351300  |
| C | -1.03292400  | 8.58355400   | 0.56829800  |
| H | -2.98502500  | 9.47759700   | 0.36928400  |
| H | 0.75116700   | 7.37762700   | 0.74056200  |
| C | -9.14569900  | -9.11316800  | 0.75170600  |
| C | -15.27145800 | 1.49420600   | 0.52121400  |
| C | -0.29174800  | 9.85155300   | 0.68086200  |
| H | -10.15420200 | -9.03576600  | 1.18031900  |
| H | -15.77067300 | 0.55165000   | 0.25832400  |
| H | 0.79438700   | 9.74131600   | 0.80356000  |
| N | -0.85895300  | 11.00207500  | 0.64092600  |
| H | -0.16268300  | 11.74484400  | 0.73747300  |
| N | -15.92989600 | 2.53786700   | 0.87383600  |
| H | -16.93399800 | 2.34392800   | 0.86516100  |
| N | -8.63416500  | -10.24111500 | 0.41532000  |
| H | -9.29205500  | -11.00034100 | 0.60666000  |
| N | 10.82411100  | -2.38710400  | 6.02058600  |
| N | 15.52975800  | 1.34708800   | -1.69074500 |
| C | 10.65258200  | -1.54761500  | 6.96703700  |
| H | 10.46137700  | -0.47871800  | 6.80732200  |
| H | 10.68489300  | -1.90160800  | 7.99718900  |
| C | 15.68764900  | 2.60358800   | -1.85262000 |
| H | 16.60581300  | 2.96345000   | -2.31636400 |
| H | 14.95236100  | 3.35639100   | -1.54078300 |
| C | 5.96624200   | -2.68296100  | -3.28991500 |
| O | 4.94266100   | -2.55859000  | -4.16663300 |
| O | 6.63405000   | -3.70460300  | -3.18340700 |
| H | 4.84254200   | -3.41854200  | -4.61357900 |

-----

Sum of electronic and thermal Free Energies = -3424.669977 (Hartree/Particle).

From TDDFT calculation in acetonitrile,  $\lambda_{\text{abs}} = 519.98$  nm.

**Table-S14.** DFT-optimized geometry of [TPA-TPE-COOH]<sup>-</sup> (singlet), computed at the B3LYP-D3/ 6-31+G\* level in acetonitrile solvent using PCM.

---

| Atom | x           | y           | z           |
|------|-------------|-------------|-------------|
| N    | 10.09758000 | -0.94505200 | 0.90224000  |
| C    | 11.34598100 | -0.31045200 | 0.68949200  |
| C    | 11.43512100 | 0.83929600  | -0.11434700 |
| C    | 12.52494800 | -0.83271400 | 1.25219200  |
| C    | 12.66269700 | 1.45951700  | -0.33565500 |
| H    | 10.53808000 | 1.23990200  | -0.57646500 |
| C    | 13.75070600 | -0.21441800 | 1.02522900  |
| H    | 12.47666500 | -1.73149100 | 1.85914100  |
| C    | 13.83786900 | 0.95321600  | 0.24880800  |
| H    | 12.70762600 | 2.33240100  | -0.98088600 |
| H    | 14.65888800 | -0.63257900 | 1.45102200  |
| C    | 9.77096600  | -1.49424300 | 2.16639400  |
| C    | 10.13190400 | -0.83402400 | 3.35391700  |
| C    | 9.08278100  | -2.71780500 | 2.25766300  |
| C    | 9.80640300  | -1.37462800 | 4.59576300  |
| H    | 10.67832700 | 0.10268800  | 3.30180800  |
| C    | 8.76363800  | -3.25852900 | 3.49961200  |
| H    | 8.80731600  | -3.24598500 | 1.35017600  |
| C    | 9.09895300  | -2.58716900 | 4.68706700  |
| H    | 10.11797400 | -0.85678900 | 5.49858200  |
| H    | 8.24479300  | -4.21133300 | 3.56179400  |
| C    | 9.16752700  | -1.05243400 | -0.17152100 |
| C    | 7.81216700  | -0.74177500 | 0.02668200  |
| C    | 9.58897700  | -1.46589300 | -1.44347800 |
| C    | 6.90133300  | -0.85266400 | -1.02069900 |
| H    | 7.47459700  | -0.41968400 | 1.00746700  |
| C    | 8.67937600  | -1.55986200 | -2.49638000 |
| H    | 10.63597700 | -1.70179600 | -1.61027900 |
| C    | 7.32445700  | -1.26456900 | -2.29262700 |
| H    | 5.85671600  | -0.60257800 | -0.86555900 |
| H    | 9.01826400  | -1.88046600 | -3.47573200 |
| N    | 6.37473500  | -1.30759800 | -3.36658000 |
| C    | 5.49966700  | -0.17885900 | -3.53539000 |
| C    | 4.17685900  | -0.20197400 | -3.12161200 |
| H    | 5.96241100  | 0.70826000  | -3.95968900 |
| C    | 3.54585200  | -1.34153700 | -2.49608400 |
| C    | 3.31212300  | 0.94474100  | -3.28906300 |
| C    | 2.22723600  | -1.31687000 | -2.08519800 |
| H    | 4.12851000  | -2.24801600 | -2.34790300 |
| C    | 1.99573900  | 0.94110100  | -2.88160500 |
| H    | 3.72707800  | 1.84416400  | -3.74308100 |

---

|   |             |             |             |
|---|-------------|-------------|-------------|
| C | 1.38192400  | -0.18505900 | -2.25545000 |
| H | 1.82256100  | -2.22266800 | -1.63828700 |
| H | 1.42039300  | 1.85401600  | -3.02078300 |
| C | -0.01003100 | -0.17179800 | -1.81882300 |
| C | -0.51484900 | -1.08942100 | -0.85719700 |
| C | -0.95663500 | 0.75795300  | -2.33310100 |
| C | -1.84077000 | -1.07043800 | -0.44280300 |
| H | 0.15333100  | -1.81671100 | -0.40493600 |
| C | -2.27474300 | 0.78624000  | -1.90057600 |
| H | -0.65817900 | 1.45297400  | -3.11270400 |
| C | -2.75971700 | -0.11687900 | -0.93057400 |
| H | -2.16937800 | -1.79108400 | 0.30264300  |
| H | -2.95691900 | 1.51334600  | -2.33288000 |
| C | -4.15949300 | -0.08345500 | -0.45772500 |
| C | -4.84010100 | 1.08434800  | -0.20401000 |
| C | -4.81034100 | -1.41078400 | -0.26044500 |
| C | -6.31936000 | 1.11821700  | -0.04764300 |
| C | -4.15099100 | 2.39517200  | -0.05927300 |
| C | -5.49714900 | -1.71542100 | 0.92774500  |
| C | -4.73126000 | -2.40957600 | -1.24611400 |
| C | -7.16881600 | 0.45522200  | -0.95307800 |
| C | -6.92173300 | 1.83871700  | 1.00045900  |
| C | -2.99673500 | 2.53129100  | 0.73485000  |
| C | -4.65603700 | 3.55362400  | -0.67708400 |
| C | -6.10644800 | -2.95396500 | 1.11128000  |
| H | -5.54853800 | -0.96959000 | 1.71568300  |
| C | -5.34847900 | -3.64619700 | -1.07010300 |
| H | -4.19816600 | -2.20260900 | -2.17018800 |
| C | -8.55188000 | 0.47939800  | -0.79765500 |
| H | -6.73414700 | -0.08154700 | -1.79107900 |
| C | -8.30504900 | 1.86051400  | 1.16136000  |
| H | -6.29371100 | 2.36849400  | 1.71192000  |
| C | -2.36048100 | 3.75997100  | 0.87974200  |
| H | -2.59894600 | 1.65797900  | 1.24325400  |
| C | -4.01714300 | 4.78432500  | -0.53899200 |
| H | -5.54989300 | 3.48309700  | -1.29134700 |
| C | -6.05390600 | -3.94355600 | 0.11136000  |
| H | -6.60736600 | -3.16412400 | 2.05251300  |
| H | -5.30303800 | -4.37978200 | -1.87051200 |
| C | -9.15213900 | 1.17523100  | 0.26927500  |
| H | -9.17496600 | -0.02556000 | -1.53105000 |
| H | -8.73033200 | 2.39378000  | 2.00735800  |
| C | -2.85107500 | 4.91459200  | 0.23811200  |
| H | -1.48599800 | 3.83023500  | 1.52116100  |

|   |              |              |             |
|---|--------------|--------------|-------------|
| H | -4.41474800  | 5.64824800   | -1.06489100 |
| C | -6.71538200  | -5.25708300  | 0.29967200  |
| C | -10.62381800 | 1.18907900   | 0.44321500  |
| C | -2.16350500  | 6.21968200   | 0.37860600  |
| C | -7.94795800  | -5.35756300  | 0.97028900  |
| C | -6.12814200  | -6.44399800  | -0.18883600 |
| C | -11.39979300 | 0.05467100   | 0.14127600  |
| C | -11.29078400 | 2.33924500   | 0.91820800  |
| C | -2.89530200  | 7.42517000   | 0.44854800  |
| C | -0.75985500  | 6.29586900   | 0.44384000  |
| C | -8.56724300  | -6.59404900  | 1.14700300  |
| H | -8.43754200  | -4.45966800  | 1.33647200  |
| C | -6.74551400  | -7.67710000  | -0.01399500 |
| H | -5.16533500  | -6.39868800  | -0.69010400 |
| C | -12.78408200 | 0.07007700   | 0.30493100  |
| H | -10.91502200 | -0.85472300  | -0.20206800 |
| C | -12.67079500 | 2.35483200   | 1.08321200  |
| H | -10.72028400 | 3.23752700   | 1.13705400  |
| C | -2.25302300  | 8.65106400   | 0.57663300  |
| H | -3.98108400  | 7.39492100   | 0.42530700  |
| C | -0.11503700  | 7.52499800   | 0.57334800  |
| H | -0.16627400  | 5.38931800   | 0.36806300  |
| C | -7.97778500  | -7.77167200  | 0.65869700  |
| H | -9.52419300  | -6.64487200  | 1.66198600  |
| H | -6.27488500  | -8.58094500  | -0.38841900 |
| C | -13.44144300 | 1.21766400   | 0.77793500  |
| H | -13.36053200 | -0.82259100  | 0.07163900  |
| H | -13.16799400 | 3.25121200   | 1.44103700  |
| C | -0.84893600  | 8.72072600   | 0.64064900  |
| H | -2.83218700  | 9.56734600   | 0.63783500  |
| H | 0.97168900   | 7.55781800   | 0.61234900  |
| C | -8.66234300  | -9.05948200  | 0.86447300  |
| C | -14.90508400 | 1.19666600   | 0.93801400  |
| C | -0.13290300  | 10.00038700  | 0.77362000  |
| H | -9.61689700  | -8.99231100  | 1.40406500  |
| H | -15.38467300 | 0.24653100   | 0.66567300  |
| H | 0.96162900   | 9.91393700   | 0.81118100  |
| N | -0.72809300  | 11.13588300  | 0.84084900  |
| H | -0.04364200  | 11.89051400  | 0.92987100  |
| N | -15.58071100 | 2.20294000   | 1.36084700  |
| H | -16.57658400 | 1.97288100   | 1.39462200  |
| N | -8.19197400  | -10.18004900 | 0.45161800  |
| H | -8.82489700  | -10.94375700 | 0.70056300  |
| N | 8.74834000   | -3.19969200  | 5.91432000  |

|   |             |             |             |
|---|-------------|-------------|-------------|
| N | 15.11929000 | 1.52300100  | 0.05538100  |
| C | 8.38636200  | -2.48301000 | 6.90727400  |
| H | 8.27890700  | -1.39154100 | 6.86606900  |
| H | 8.15713100  | -2.97222500 | 7.85372900  |
| C | 15.25305300 | 2.79104700  | -0.01517100 |
| H | 16.24318700 | 3.20621400  | -0.20201800 |
| H | 14.42589300 | 3.50096800  | 0.11255200  |
| C | 6.31706800  | -2.42339600 | -4.15018500 |
| O | 5.45780600  | -2.29063000 | -5.19856300 |
| O | 6.94332600  | -3.47109700 | -3.96745700 |
| H | 5.47960800  | -3.14252500 | -5.66999200 |

Sum of electronic and thermal Free Energies = -3424.789558 (Hartree/Particle).

**Table-S15.** DFT-optimized geometry of [TPA-TPE-CO]<sup>+</sup> (doublet), computed at the UB3LYP-D3/ 6-31+G\* level in acetonitrile solvent using PCM. The spin density plot is also shown below. (Isovalue = 0.0004)

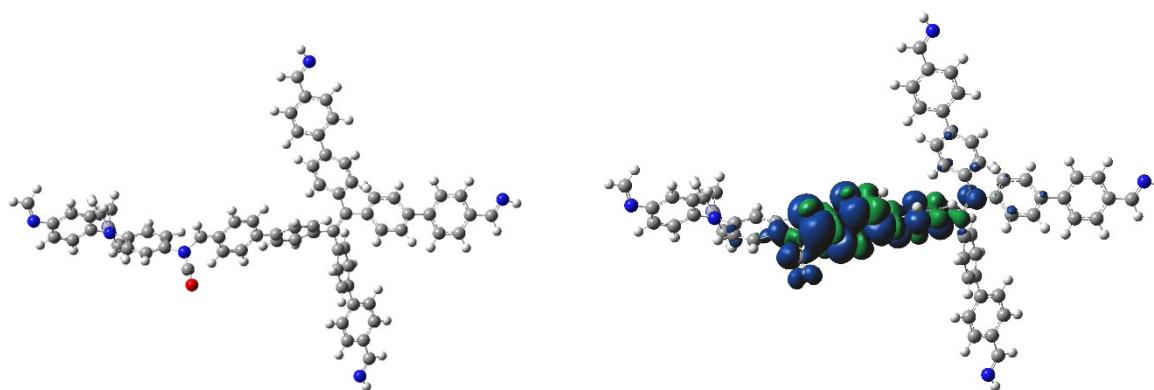

Spin Density Distribution

| Atom | x           | y           | z           |
|------|-------------|-------------|-------------|
| N    | 10.35221400 | -1.00782200 | 0.64201100  |
| C    | 11.71966800 | -0.68880900 | 0.38356000  |
| C    | 12.06884500 | 0.53825700  | -0.19691000 |
| C    | 12.72908300 | -1.60336900 | 0.71942400  |
| C    | 13.40615300 | 0.84955400  | -0.43639400 |
| H    | 11.29008400 | 1.24525100  | -0.46770200 |
| C    | 14.06463400 | -1.29390600 | 0.47712700  |



|   |             |             |             |
|---|-------------|-------------|-------------|
| H | 12.46127900 | -2.55736600 | 1.16365600  |
| C | 14.42219200 | -0.05681100 | -0.08416900 |
| H | 13.66054000 | 1.79370500  | -0.90931300 |
| H | 14.84559300 | -2.00752700 | 0.72406000  |
| C | 10.00877400 | -1.49300000 | 1.93950700  |
| C | 10.48043000 | -0.83425300 | 3.08294500  |
| C | 9.23614300  | -2.65582500 | 2.08539800  |
| C | 10.17112700 | -1.31758900 | 4.35342500  |
| H | 11.10003300 | 0.05097400  | 2.97440700  |
| C | 8.92995400  | -3.13987900 | 3.35381900  |
| H | 8.88711900  | -3.18265800 | 1.20228700  |
| C | 9.37358400  | -2.46575400 | 4.50401000  |
| H | 10.56466100 | -0.81088400 | 5.22984800  |
| H | 8.34421100  | -4.04781500 | 3.46647900  |
| C | 9.37751300  | -0.86084700 | -0.35134000 |
| C | 8.03429000  | -0.58917600 | -0.00681000 |
| C | 9.71597900  | -0.97447800 | -1.71730500 |
| C | 7.06080200  | -0.45240500 | -0.98762300 |
| H | 7.75464100  | -0.48433100 | 1.03522300  |
| C | 8.75098100  | -0.81559700 | -2.70509000 |
| H | 10.74010300 | -1.18088300 | -2.00621000 |
| C | 7.43162800  | -0.56733100 | -2.32773000 |
| H | 6.03215900  | -0.24292000 | -0.71284300 |
| H | 9.02917700  | -0.88753700 | -3.75262700 |
| N | 6.39394000  | -0.40095500 | -3.34212100 |
| C | 5.44631900  | 0.70313900  | -3.34997100 |
| C | 4.11614300  | 0.52371900  | -2.95554500 |
| H | 5.87654600  | 1.64321900  | -3.67227800 |
| C | 3.58487000  | -0.71625200 | -2.48116700 |
| C | 3.23274800  | 1.64841900  | -3.00591200 |
| C | 2.26610000  | -0.81198300 | -2.08741500 |
| H | 4.21770100  | -1.59703300 | -2.42771400 |
| C | 1.91741500  | 1.53246500  | -2.60985600 |
| H | 3.61359900  | 2.60570300  | -3.35034300 |
| C | 1.38918800  | 0.30209100  | -2.13943300 |
| H | 1.89197500  | -1.77453100 | -1.75406600 |
| H | 1.28466300  | 2.41366900  | -2.63631200 |
| C | -0.01598500 | 0.18988300  | -1.71774800 |
| C | -0.41262200 | -0.73241100 | -0.72554500 |
| C | -1.01756600 | 1.00052600  | -2.29497900 |
| C | -1.74034100 | -0.82795900 | -0.32318900 |
| H | 0.32828500  | -1.35897500 | -0.23826300 |
| C | -2.34184600 | 0.90614600  | -1.88595600 |
| H | -0.76496900 | 1.68929300  | -3.09554200 |

|   |              |             |             |
|---|--------------|-------------|-------------|
| C | -2.73067300  | 0.00372300  | -0.87798600 |
| H | -2.01378800  | -1.54019700 | 0.45035300  |
| H | -3.09270400  | 1.53444300  | -2.35496100 |
| C | -4.14747900  | -0.10093900 | -0.43789200 |
| C | -4.90597200  | 1.00081100  | -0.14890200 |
| C | -4.68319200  | -1.48660200 | -0.32946700 |
| C | -6.38270500  | 0.92732700  | 0.02351400  |
| C | -4.30733800  | 2.35325500  | 0.02114200  |
| C | -5.37449500  | -1.91276800 | 0.81799700  |
| C | -4.48470500  | -2.41830700 | -1.36291300 |
| C | -7.19370800  | 0.25183700  | -0.90548700 |
| C | -7.01275900  | 1.56413800  | 1.10684100  |
| C | -3.18218300  | 2.55428800  | 0.83976800  |
| C | -4.87180300  | 3.47537000  | -0.61000600 |
| C | -5.87548400  | -3.20790500 | 0.91512200  |
| H | -5.51526500  | -1.21948700 | 1.64195400  |
| C | -4.99364900  | -3.71207700 | -1.27164600 |
| H | -3.94646800  | -2.11721200 | -2.25785100 |
| C | -8.57459300  | 0.18887500  | -0.74169500 |
| H | -6.73373300  | -0.22242000 | -1.76728000 |
| C | -8.39342400  | 1.49287100  | 1.27826200  |
| H | -6.41047800  | 2.10133100  | 1.83462900  |
| C | -2.62280700  | 3.81965300  | 0.99413400  |
| H | -2.74793500  | 1.70797000  | 1.36377200  |
| C | -4.30691600  | 4.74045000  | -0.46541500 |
| H | -5.74836800  | 3.34924200  | -1.23989400 |
| C | -5.70522200  | -4.13290800 | -0.13246300 |
| H | -6.38428700  | -3.51172900 | 1.82582500  |
| H | -4.85857000  | -4.39414700 | -2.10658500 |
| C | -9.20386100  | 0.79927700  | 0.35994200  |
| H | -9.17388900  | -0.31929100 | -1.49214300 |
| H | -8.84343900  | 1.96150100  | 2.14906700  |
| C | -3.16639100  | 4.93887200  | 0.33567100  |
| H | -1.76876700  | 3.94394400  | 1.65418900  |
| H | -4.74274000  | 5.57905900  | -1.00137200 |
| C | -6.25584900  | -5.50634300 | -0.03595300 |
| C | -10.67313000 | 0.71867900  | 0.54265400  |
| C | -2.55883000  | 6.28321800  | 0.48494500  |
| C | -7.49530500  | -5.74597100 | 0.58441800  |
| C | -5.55413700  | -6.61056500 | -0.56505700 |
| C | -11.38083000 | -0.45036200 | 0.20928500  |
| C | -11.40242600 | 1.81191900  | 1.05713200  |
| C | -3.36194100  | 7.44225300  | 0.54346800  |
| C | -1.16357300  | 6.44031400  | 0.56974700  |

|   |              |              |             |
|---|--------------|--------------|-------------|
| C | -8.01225700  | -7.03768500  | 0.67287500  |
| H | -8.07077600  | -4.91404800  | 0.98016300  |
| C | -6.06939900  | -7.89871000  | -0.47791200 |
| H | -4.58366700  | -6.45696400  | -1.02858800 |
| C | -12.76234600 | -0.52307600  | 0.38233100  |
| H | -10.84509000 | -1.31748600  | -0.16627900 |
| C | -12.77978400 | 1.73996100   | 1.23006500  |
| H | -10.88425900 | 2.73506600   | 1.30111600  |
| C | -2.79442600  | 8.70387900   | 0.67992900  |
| H | -4.44353600  | 7.34783200   | 0.50467100  |
| C | -0.59384600  | 7.70530600   | 0.70690500  |
| H | -0.51726800  | 5.56968900   | 0.50458600  |
| C | -7.30970300  | -8.13256000  | 0.14389100  |
| H | -8.97671500  | -7.19674000  | 1.15026800  |
| H | -5.51283800  | -8.73839600  | -0.88276100 |
| C | -13.48277400 | 0.56826400   | 0.89449500  |
| H | -13.28651800 | -1.44090600  | 0.12490600  |
| H | -13.32663400 | 2.59372300   | 1.61811500  |
| C | -1.39806000  | 8.85520000   | 0.76290100  |
| H | -3.42669400  | 9.58485100   | 0.73247500  |
| H | 0.48826000   | 7.80212400   | 0.76183300  |
| C | -7.88882600  | -9.48250500  | 0.25515300  |
| C | -14.94180000 | 0.45400300   | 1.06351700  |
| C | -0.76023200  | 10.17558300  | 0.90473200  |
| H | -8.86329500  | -9.52521200  | 0.76040300  |
| H | -15.36584100 | -0.51400300  | 0.76379600  |
| H | 0.33681300   | 10.15423100  | 0.95861700  |
| N | -1.42337900  | 11.27274700  | 0.96149000  |
| H | -0.78740100  | 12.06756800  | 1.06009200  |
| N | -15.67207000 | 1.40366900   | 1.52366900  |
| H | -16.65218200 | 1.11357700   | 1.55716900  |
| N | -7.31041200  | -10.53446500 | -0.19835200 |
| H | -7.88339000  | -11.36159400 | -0.01526500 |
| N | 9.04203500   | -3.01730800  | 5.76453000  |
| N | 15.79540000  | 0.19307500   | -0.31889700 |
| C | 8.72688300   | -2.24557300  | 6.73092500  |
| H | 8.64760100   | -1.15485300  | 6.63827800  |
| H | 8.51173300   | -2.68277300  | 7.70560700  |
| C | 16.27465700  | 1.35497800   | -0.09762600 |
| H | 17.32490600  | 1.54271000   | -0.31941900 |
| H | 15.68995000  | 2.18571300   | 0.31769800  |
| C | 6.29324900   | -1.14694600  | -4.36719600 |
| O | 6.16910200   | -1.79668100  | -5.31073000 |

---

Sum of electronic and thermal Free Energies = -3348.603140 (Hartree/Particle).

From TDDFT calculation in acetonitrile,  $\lambda_{\text{abs}} = 529.46$  nm.

**Table-S16.** DFT-optimized geometry of [TPA-TPE-CO] (singlet), computed at the B3LYP-D3/ 6-31+G\* level in acetonitrile solvent using PCM.

| Atom | x          | y           | z           |
|------|------------|-------------|-------------|
| N    | 6.08291000 | -1.08656900 | 1.86146500  |
| C    | 6.77543700 | -1.81309300 | 2.86427700  |
| C    | 8.16433300 | -1.66562900 | 3.01379700  |
| C    | 6.09509300 | -2.71110600 | 3.70535300  |
| C    | 8.85423000 | -2.38428200 | 3.98774100  |
| H    | 8.70506300 | -0.99211000 | 2.35557000  |
| C    | 6.78665800 | -3.43141300 | 4.67474400  |
| H    | 5.02461500 | -2.84903800 | 3.58912400  |
| C    | 8.17060400 | -3.26299800 | 4.84736600  |
| H    | 9.93180700 | -2.27270600 | 4.06863700  |
| H    | 6.25773900 | -4.13481500 | 5.31210800  |
| C    | 4.78875200 | -0.56252100 | 2.11423200  |
| C    | 4.48705100 | 0.02448400  | 3.35492800  |
| C    | 3.77819800 | -0.63457400 | 1.13743100  |
| C    | 3.21293000 | 0.52496900  | 3.61428700  |
| H    | 5.25196800 | 0.07504700  | 4.12381300  |
| C    | 2.50557600 | -0.13642900 | 1.39992400  |
| H    | 3.98950900 | -1.09054900 | 0.17504000  |
| C    | 2.20671000 | 0.46360900  | 2.63389900  |
| H    | 2.99529300 | 0.94832800  | 4.59091000  |
| H    | 1.72767500 | -0.20922200 | 0.64575800  |
| C    | 6.63855300 | -0.97763500 | 0.55868400  |
| C    | 6.58200200 | 0.24453700  | -0.13107500 |
| C    | 7.22450200 | -2.08913200 | -0.06816900 |
| C    | 7.05658200 | 0.34217800  | -1.43493900 |
| H    | 6.14234300 | 1.11161700  | 0.35211000  |
| C    | 7.70584000 | -1.99581000 | -1.37303500 |
| H    | 7.27879800 | -3.03630600 | 0.45947600  |
| C    | 7.60117400 | -0.78328600 | -2.06611500 |
| H    | 6.98610100 | 1.28075300  | -1.97589800 |

|   |             |             |             |
|---|-------------|-------------|-------------|
| H | 8.12476000  | -2.86827100 | -1.86505000 |
| N | 7.96819500  | -0.68055800 | -3.43122300 |
| C | 7.01053300  | -0.36391300 | -4.62655700 |
| C | 5.55151600  | -0.42113600 | -4.34016300 |
| H | 7.36246800  | 0.48736900  | -5.20492200 |
| C | 4.91863600  | -1.61187900 | -3.94778100 |
| C | 4.81449400  | 0.77174300  | -4.30756500 |
| C | 3.59838800  | -1.60186800 | -3.50538800 |
| H | 5.45958400  | -2.55372400 | -3.97948600 |
| C | 3.49524700  | 0.78134000  | -3.85865900 |
| H | 5.29035800  | 1.70624600  | -4.59503700 |
| C | 2.86494600  | -0.40239700 | -3.43046600 |
| H | 3.13170400  | -2.54008300 | -3.22006600 |
| H | 2.96681400  | 1.72819900  | -3.79789900 |
| C | 1.48661400  | -0.37494000 | -2.88301300 |
| C | 1.09906600  | -1.24893200 | -1.84959700 |
| C | 0.53100000  | 0.54456400  | -3.35476000 |
| C | -0.17696500 | -1.18704900 | -1.29377400 |
| H | 1.81371900  | -1.96104600 | -1.44664300 |
| C | -0.73803500 | 0.61573300  | -2.78749500 |
| H | 0.77615100  | 1.20380000  | -4.18275500 |
| C | -1.10946100 | -0.23104900 | -1.72903100 |
| H | -0.44127700 | -1.86208300 | -0.48396700 |
| H | -1.45413300 | 1.34056700  | -3.16325500 |
| C | -2.45505400 | -0.12519800 | -1.09815200 |
| C | -2.94969900 | 1.07569700  | -0.67080100 |
| C | -3.20472300 | -1.40315900 | -0.96028800 |
| C | -4.37506700 | 1.27251100  | -0.29217100 |
| C | -2.07666800 | 2.27735000  | -0.54810500 |
| C | -3.82919800 | -1.75670000 | 0.24908100  |
| C | -3.27477900 | -2.31556700 | -2.02750500 |
| C | -5.42034600 | 0.79766800  | -1.10418600 |
| C | -4.71776700 | 1.97387100  | 0.87713500  |
| C | -0.86258900 | 2.21257900  | 0.15594300  |
| C | -2.45158900 | 3.51118200  | -1.10627100 |
| C | -4.52212400 | -2.95725900 | 0.37637600  |
| H | -3.76242000 | -1.08316500 | 1.09829300  |
| C | -3.97538000 | -3.51361900 | -1.90490500 |
| H | -2.79233900 | -2.07234900 | -2.97049200 |
| C | -6.75205100 | 0.98805500  | -0.74640100 |
| H | -5.18193600 | 0.27953200  | -2.02830300 |
| C | -6.04984900 | 2.15712400  | 1.24170900  |
| H | -3.92971700 | 2.35984400  | 1.51828500  |
| C | -0.03425300 | 3.32542700  | 0.26062900  |

|   |              |             |             |
|---|--------------|-------------|-------------|
| H | -0.56957400  | 1.28629500  | 0.63956600  |
| C | -1.61841700  | 4.62444300  | -1.01025400 |
| H | -3.39319300  | 3.59079100  | -1.64359500 |
| C | -4.61845900  | -3.85819700 | -0.70129600 |
| H | -4.97134100  | -3.21032700 | 1.33285900  |
| H | -4.04317400  | -4.17724600 | -2.76261300 |
| C | -7.09622400  | 1.66370400  | 0.43997700  |
| H | -7.53459100  | 0.63014800  | -1.40989400 |
| H | -6.27806600  | 2.66829100  | 2.17294800  |
| C | -0.38659500  | 4.55231200  | -0.33179300 |
| H | 0.88434900   | 3.24411400  | 0.83463200  |
| H | -1.91701900  | 5.55219500  | -1.49069600 |
| C | -5.36782600  | -5.13075500 | -0.56921000 |
| C | -8.51464100  | 1.85349700  | 0.82800900  |
| C | 0.51087500   | 5.72845200  | -0.23457600 |
| C | -6.55692000  | -5.19582700 | 0.17944800  |
| C | -4.91029400  | -6.31192700 | -1.19157300 |
| C | -9.47192700  | 0.85224000  | 0.58334600  |
| C | -8.94429400  | 3.04275100  | 1.45494200  |
| C | -0.00790200  | 7.03335000  | -0.09363500 |
| C | 1.90864500   | 5.57413400  | -0.27788500 |
| C | -7.26010600  | -6.39349400 | 0.30138600  |
| H | -6.94768600  | -4.29861300 | 0.65093900  |
| C | -5.61110400  | -7.50627800 | -1.07070500 |
| H | -3.98212200  | -6.29562100 | -1.75595200 |
| C | -10.80476600 | 1.03268100  | 0.95024600  |
| H | -9.16836600  | -0.08408500 | 0.12389300  |
| C | -10.27295100 | 3.22306400  | 1.82154200  |
| H | -8.23090500  | 3.84224600  | 1.63429100  |
| C | 0.83392300   | 8.13549300  | 0.00222200  |
| H | -1.08280600  | 7.17960700  | -0.03479800 |
| C | 2.75340300   | 6.67869100  | -0.18054200 |
| H | 2.33853300   | 4.58541800  | -0.41039600 |
| C | -6.80004800  | -7.56561400 | -0.32059900 |
| H | -8.18156900  | -6.41670300 | 0.87916000  |
| H | -5.24045700  | -8.40781100 | -1.54875700 |
| C | -11.22624400 | 2.21811500  | 1.57435800  |
| H | -11.52499700 | 0.24040200  | 0.75790800  |
| H | -10.58788100 | 4.14782900  | 2.29507300  |
| C | 2.23119000   | 7.97467900  | -0.03872100 |
| H | 0.41860200   | 9.13176400  | 0.11954200  |
| H | 3.83074900   | 6.53420500  | -0.22357900 |
| C | -7.56997900  | -8.81242800 | -0.17000200 |
| C | -12.64280700 | 2.37175200  | 1.94819000  |

|   |              |              |             |
|---|--------------|--------------|-------------|
| C | 3.15498600   | 9.11742200   | 0.06289800  |
| H | -8.48159800  | -8.72074100  | 0.43603600  |
| H | -13.27961300 | 1.51078500   | 1.70323400  |
| H | 4.22063100   | 8.85424300   | 0.01707300  |
| N | 2.75905300   | 10.33095900  | 0.19589500  |
| H | 3.56160600   | 10.96274600  | 0.24727900  |
| N | -13.10982500 | 3.42387100   | 2.51568500  |
| H | -14.11296600 | 3.32005400   | 2.68545000  |
| N | -7.21421000  | -9.92578800  | -0.70003100 |
| H | -7.88811900  | -10.65987500 | -0.47023100 |
| N | 0.88456700   | 0.92271000   | 2.84082300  |
| N | 8.81110600   | -4.03307100  | 5.84771200  |
| C | 0.67454400   | 1.99930700   | 3.49276300  |
| H | 1.47380400   | 2.64284700   | 3.88257000  |
| H | -0.35313900  | 2.31857000   | 3.66396600  |
| C | 9.76935600   | -3.52961300  | 6.52481100  |
| H | 10.27491300  | -4.15060400  | 7.26398000  |
| H | 10.11465400  | -2.49343900  | 6.41669700  |
| C | 7.86075900   | -1.56376300  | -4.44019200 |
| O | 8.18158200   | -2.68570400  | -4.77752000 |

Sum of electronic and thermal Free Energies = -3348.815213 (Hartree/Particle).

**Table-S17.** DFT-optimized geometry of **CO<sub>2</sub>** (singlet), computed at the B3LYP-D3/ 6-31+G\* level in acetonitrile solvent using PCM.

| Atom | x          | y          | z           |
|------|------------|------------|-------------|
| C    | 0.00000000 | 0.00000000 | 0.00000000  |
| O    | 0.00000000 | 0.00000000 | 1.16929200  |
| O    | 0.00000000 | 0.00000000 | -1.16929200 |

Sum of electronic and thermal Free Energies = -188.602658 (Hartree/Particle).

**Table-S18.** DFT-optimized geometry of **CO** (singlet), computed at the B3LYP-D3/ 6-31+G\* level in acetonitrile solvent using PCM.

| Atom | x          | y          | z           |
|------|------------|------------|-------------|
| C    | 0.00000000 | 0.00000000 | -0.64984200 |
| O    | 0.00000000 | 0.00000000 | 0.48738100  |

Sum of electronic and thermal Free Energies = -113.332229 (Hartree/Particle).

**Table-S19.** DFT-optimized geometry of **H<sub>2</sub>O** (singlet), computed at the B3LYP-D3/ 6-31+G\* level in acetonitrile solvent using PCM.

| Atom | x          | y           | z           |
|------|------------|-------------|-------------|
| O    | 0.00000000 | 0.00000000  | 0.11854000  |
| H    | 0.00000000 | 0.76855000  | -0.47415900 |
| H    | 0.00000000 | -0.76855000 | -0.47415900 |

Sum of electronic and thermal Free Energies = -76.427699 (Hartree/Particle).

**Table-S20.** DFT-optimized geometry of **TEA** (singlet), computed at the B3LYP-D3/ 6-31+G\* level in acetonitrile solvent using PCM.

| Atom | x           | y          | z           |
|------|-------------|------------|-------------|
| N    | -0.00023300 | 0.00003900 | -0.00909700 |
| C    | 1.13109000  | 0.83164500 | 0.43556200  |
| C    | 1.33749400  | 2.08095400 | -0.42377700 |
| H    | 2.04065900  | 0.22556900 | 0.38408900  |
| H    | 1.00815300  | 1.11610700 | 1.49966700  |
| H    | 2.19525500  | 2.65579400 | -0.05348200 |
| H    | 1.53227500  | 1.79936100 | -1.46515700 |
| H    | 0.46449000  | 2.74308500 | -0.40964800 |
| C    | -1.28637800 | 0.56426300 | 0.43447900  |
| C    | -2.47174800 | 0.11632700 | -0.42360900 |
| H    | -1.21667000 | 1.65495800 | 0.38073400  |



|   |             |             |             |
|---|-------------|-------------|-------------|
| H | -1.47107000 | 0.31763100  | 1.49910500  |
| H | -3.39821600 | 0.57298900  | -0.05427900 |
| H | -2.32557600 | 0.42313400  | -1.46584600 |
| H | -2.60905900 | -0.97069500 | -0.40667200 |
| C | 0.15390000  | -1.39587500 | 0.43429300  |
| C | 1.13579000  | -2.19738100 | -0.42324800 |
| H | -0.82531000 | -1.88108800 | 0.37911100  |
| H | 0.45853900  | -1.43286900 | 1.49926900  |
| H | 1.20202900  | -3.22891900 | -0.05603300 |
| H | 0.79911200  | -2.22133700 | -1.46623100 |
| H | 2.14613300  | -1.77359800 | -0.40315000 |

Sum of electronic and thermal Free Energies = -292.271473 (Hartree/Particle).

**Table-S21.** DFT-optimized geometry of TEA<sup>+</sup> (doublet), computed at the UB3LYP-D3/ 6-31+G\* level in acetonitrile solvent using PCM.

| Atom | x           | y           | z           |
|------|-------------|-------------|-------------|
| N    | -0.00186100 | 0.00201400  | -0.62214400 |
| C    | 0.59329800  | -1.32717100 | -0.61226200 |
| H    | 1.66445300  | -1.22192400 | -0.78892500 |
| H    | 0.14952500  | -1.87841400 | -1.45113600 |
| C    | 0.85234000  | 1.18179600  | -0.60790100 |
| H    | 0.22592900  | 2.05924300  | -0.77506500 |
| H    | 1.54822600  | 1.07833800  | -1.45032100 |
| C    | -1.45041200 | 0.15189600  | -0.61005100 |
| H    | -1.89667600 | -0.82718700 | -0.78945000 |
| H    | -1.70656100 | 0.81563800  | -1.44552600 |
| C    | 1.64255300  | 1.30680700  | 0.70997900  |
| H    | 2.30272600  | 0.44981600  | 0.86874100  |
| H    | 2.25844100  | 2.20826700  | 0.64325300  |
| H    | 0.96620600  | 1.40322400  | 1.56314400  |
| C    | 0.31881900  | -2.07355700 | 0.70878300  |
| H    | -0.75166500 | -2.22046600 | 0.87483600  |
| H    | 0.79420900  | -3.05617900 | 0.63989600  |
| H    | 0.74470600  | -1.53422200 | 1.55864200  |
| C    | -1.95598400 | 0.75907600  | 0.71403300  |
| H    | -1.54115700 | 1.75585200  | 0.88512200  |

|   |             |            |            |
|---|-------------|------------|------------|
| H | -3.04423100 | 0.84548600 | 0.64567500 |
| H | -1.70479700 | 0.11535100 | 1.56063600 |

Sum of electronic and thermal Free Energies = -292.079251 (Hartree/Particle).

**Table-S22.** DFT-optimized geometry of  $[\text{Et}_2\text{N}=\text{CHCH}_3]\cdot$  (doublet), computed at the UB3LYP-D3/ 6-31+G\* level in acetonitrile solvent using PCM.

| Atom | x           | y           | z           |
|------|-------------|-------------|-------------|
| N    | -0.04867700 | -0.09736800 | -0.20868800 |
| C    | 1.28759600  | -0.56254200 | -0.60277300 |
| H    | 1.87125100  | 0.30317500  | -0.93006100 |
| H    | 1.20141900  | -1.23082000 | -1.47494500 |
| C    | -0.34019500 | 1.31340300  | -0.48082500 |
| H    | -1.41355700 | 1.47340200  | -0.36218500 |
| H    | -0.09978200 | 1.54724200  | -1.53290300 |
| C    | -1.06970300 | -1.04461300 | -0.26117600 |
| C    | 0.41250500  | 2.26450800  | 0.45379600  |
| H    | 1.49860100  | 2.14241700  | 0.37215700  |
| H    | 0.17319500  | 3.30510600  | 0.20271900  |
| H    | 0.12771000  | 2.08286000  | 1.49649700  |
| C    | 2.02619100  | -1.27467900 | 0.53385600  |
| H    | 1.45953500  | -2.14278200 | 0.88934500  |
| H    | 3.00672100  | -1.62658700 | 0.18994100  |
| H    | 2.17676500  | -0.59550400 | 1.38089500  |
| C    | -2.41647900 | -0.76405000 | 0.34249100  |
| H    | -2.98969200 | 0.00262500  | -0.19672200 |
| H    | -3.01820500 | -1.67933000 | 0.33113100  |
| H    | -2.34634800 | -0.42417000 | 1.39294500  |
| H    | -0.70636500 | -2.06821000 | -0.21021100 |

Sum of electronic and thermal Free Energies = -291.634151 (Hartree/Particle).

## References:

1. J. Dong, X. Li, S. B. Peh, Y. D. Yuan, Y. Wang, D. Ji, S. Peng, G. Liu, S. Ying, D. Yuan, J. Jiang, S. Ramakrishna and D. Zhao, *Chem. Mater.*, 2019, **31**, 146-160.
2. R. K. Yadav, A. Kumar, N.-J. Park, K.-J. Kong and J.-O. Baeg, *J. Mater. Chem. A*, 2016, **4**, 9413-9418.
3. K. Lei, D. Wang, L. Ye, M. Kou, Y. Deng, Z. Ma, L. Wang and Y. Kong, *ChemSusChem*, 2020, **13**, 1725-1729.
4. P. Sarkar, S. Riyajuddin, A. Das, A. Hazra Chowdhury, K. Ghosh and S. M. Islam, *Mol. Catal.*, 2020, **484**, 110730.
5. W. Liu, X. Li, C. Wang, H. Pan, W. Liu, K. Wang, Q. Zeng, R. Wang and J. Jiang, *J. Am. Chem. Soc.*, 2019, **141**, 17431-17440.
6. L.-j. Wang, R.-l. Wang, X. Zhang, J.-l. Mu, Z.-y. Zhou and Z.-m. Su, *ChemSusChem*, 2020, **13**, 2973-2980.
7. M. J. Frisch, G. W. Trucks, H. B. Schlegel, G. E. Scuseria, M. A. Robb, J. R. Cheeseman, G. Scalmani, V. Barone, B. Mennucci, G. A. Petersson, H. Nakatsuji, M. Caricato, H. P. H. X. Li, A. F. Izmaylov, J. Bloino, G. Zheng, J. L. Sonnenberg, M. Hada, M. Ehara, K. Toyota, R. Fukuda, J. Hasegawa, M. Ishida, T. Nakajima, Y. Honda, O. Kitao, H. Nakai, T. Vreven, J. J. A. Montgomery, J. E. Peralta, F. Ogliaro, M. Bearpark, J. J. Heyd, E. Brothers, K. N. Kudin, V. N. Staroverov, R. Kobayashi, J. Normand, K. Raghavachari, A. Rendell, J. C. Burant, S. S. Iyengar, J. Tomasi, N. R. M. Cossi, J. M. Millam, M. Klene, J. E. Knox, J. B. Cross, V. Bakken, C. Adamo, J. Jaramillo, R. Gomperts, R. E. Stratmann, O. Yazyev, A. J. Austin, R. Cammi, C. Pomelli, J. W. Ochterski, R. L. Martin, K. Morokuma, V. G. Zakrzewski, G. A. Voth, P. Salvador, J. J. Dannenberg, S. Dapprich, A. D. Daniels, O. Farkas, J. B. Foresman, J. V. Ortiz, J. Cioslowski and D. J. Fox, *Gaussian 16, Revision C.01*, Gaussian, Inc., Wallingford CT, 2016.
8. B. Miehlich, A. Savin, H. Stoll and H. Preuss, *Chem. Phys. Lett.*, 1989, **157**, 200-206.
9. S. Grimme, J. Antony, S. Ehrlich and H. Krieg, *J. Chem. Phys.*, 2010, **132**, 154104.
10. S. Grimme, *J. Comput. Chem.*, 2004, **25**, 1463-1473.
11. S. Grimme, *J. Comput. Chem.*, 2006, **27**, 1787-1799.
12. A. D. Becke, *J. Chem. Phys.*, 1993, **98**, 1372-1377.
13. C. Lee, W. Yang and R. G. Parr, *Phys. Rev. B*, 1988, **37**, 785-789.
14. J. Tomasi, B. Mennucci and R. Cammi, *Chem. Rev.*, 2005, **105**, 2999-3094.
15. R. Dennington, T. A. Keith and J. M. Millam, *Semichem Inc Shawnee Mission KS*, 2016.
